# Supplementary material for: Forecasting the effects of smoking prevalence scenarios on years of life lost and life expectancy from 2022 to 2050: a systematic analysis for the Global Burden of Disease Study 2021
Source: PubMed Central journal article supplement (PMC11447278; doi:10.1016/s2468-2667(24)00166-x), 2024-10-02

# THE LANCET

## Public Health

### Supplementary appendix 2

This appendix formed part of the original submission and has been peer reviewed. We post it as supplied by the authors.

Supplement to: GBD 2021 Tobacco Forecasting Collaborators. Forecasting the effects of smoking prevalence scenarios on years of life lost and life expectancy from 2022 to 2050: a systematic analysis for the Global Burden of Disease Study 2021. *Lancet Public Health* 2024; **9**: e729–44.

Appendix 2: supplementary results appendix to “Forecasting the impacts of smoking prevalence scenarios on years of life lost and life expectancy from 2022 to 2050 - a systematic analysis for the Global Burden of Disease Study 2021”

This supplement provides additional figures and tables containing more detailed results for “Forecasting the impacts of smoking prevalence scenarios on years of life lost and life expectancy from 2022 to 2050 - a systematic analysis for the Global Burden of Disease Study 2021”.

## Table of Contents:

|                                                                                                                                                                                                  |    |
|--------------------------------------------------------------------------------------------------------------------------------------------------------------------------------------------------|----|
| Supplementary Results Table S1. Global all-age and age-standardised prevalence of current and former smokers by location, sex, and scenario, 2022 to 2050 .....                                  | 3  |
| Supplementary Results Table S2. Cumulative all-age counts and age-standardised rates of years of life lost (YLLs) between 2022 and 2050 by location, sex, and scenario .....                     | 10 |
| Supplementary Results Table S3. Life expectancy at birth by location, sex, and scenario .....                                                                                                    | 17 |
| Supplementary Results Figure S1. Years of Life Lost (YLLs) by scenario, all causes .....                                                                                                         | 27 |
| Supplementary Results Figure S2. Years of Life Lost (YLLs) by scenario, IHD .....                                                                                                                | 28 |
| Supplementary Results Figure S3. Years of Life Lost (YLLs) by scenario, lung cancer .....                                                                                                        | 29 |
| Supplementary Results Figure S4. Years of Life Lost (YLLs) by scenario, COPD .....                                                                                                               | 30 |
| Supplementary Results Figure S5. Life expectancy at birth by super-region, sex, and scenario.....                                                                                                | 31 |
| Supplementary Results Figure S6. Global YLLs under Reference scenario.....                                                                                                                       | 32 |
| Supplementary Results Figure S7. Difference in cumulative age-standardised rate of YLLs under Elimination-2023 scenario compared to Reference scenario, 2022 to 2050 (per 100,000), Males.....   | 33 |
| Supplementary Results Figure S8. Difference in cumulative age-standardised rate of YLLs under Elimination-2023 scenario compared to Reference scenario, 2022 to 2050 (per 100,000), Females..... | 34 |















Supplementary Results Table S1. Global all-age and age-standardised prevalence of current and former smokers by location, sex, and scenario, 2022 and 2050

| Location              | Sex    | Current Smoking Prevalence | Current Smoking Prevalence | Former Smoking Prevalence | Former Smoking Prevalence | Current Smokers (millions) | Current Smokers (millions) | Former Smokers (millions) | Former Smokers (millions) |
|-----------------------|--------|----------------------------|----------------------------|---------------------------|---------------------------|----------------------------|----------------------------|---------------------------|---------------------------|
|                       |        | 2022                       | 2050                       | 2022                      | 2050                      | 2022                       | 2050                       | 2022                      | 2050                      |
| Côte d'Ivoire         | Female | 2.5% (1.91% - 3.18%)       | 1.77% (1.27% - 2.5%)       | 1.23% (1.01% - 1.44%)     | 1.12% (0.92% - 1.33%)     | 0.36 (0.265 - 0.493)       | 0.433 (0.3 - 0.655)        | 0.163 (0.128 - 0.202)     | 0.269 (0.206 - 0.336)     |
| Côte d'Ivoire         | Male   | 16.7% (15.3% - 18%)        | 12.6% (10.6% - 16.5%)      | 9.78% (8.99% - 10.7%)     | 9.17% (8.37% - 10%)       | 2.53 (2.17 - 2.9)          | 3.19 (2.5 - 4.32)          | 1.16 (1 - 1.34)           | 2.09 (1.73 - 2.47)        |
| Gambia                | Female | 0.93% (0.71% - 1.19%)      | 0.63% (0.48% - 0.8%)       | 1.49% (1.25% - 1.78%)     | 1.51% (1.25% - 1.8%)      | 0.0124 (0.009 - 0.0172)    | 0.0119 (0.0089 - 0.0162)   | 0.0166 (0.0132 - 0.0207)  | 0.0282 (0.0223 - 0.036)   |
| Gambia                | Male   | 17.9% (16.7% - 19.3%)      | 12.7% (11.8% - 13.8%)      | 15.3% (14.2% - 16.6%)     | 15.4% (14.3% - 16.7%)     | 0.203 (0.175 - 0.231)      | 0.236 (0.196 - 0.279)      | 0.154 (0.132 - 0.176)     | 0.263 (0.217 - 0.312)     |
| Ghana                 | Female | 2.66% (2.1% - 3.35%)       | 3.06% (2.41% - 3.88%)      | 1.2% (1.02% - 1.39%)      | 1.19% (1.01% - 1.38%)     | 0.494 (0.373 - 0.653)      | 0.817 (0.601 - 1.07)       | 0.192 (0.152 - 0.235)     | 0.333 (0.253 - 0.415)     |
| Ghana                 | Male   | 10.5% (9.56% - 11.6%)      | 12.3% (10.2% - 13.8%)      | 10.4% (9.67% - 11.2%)     | 10.2% (9.48% - 11.1%)     | 1.64 (1.39 - 1.91)         | 3.33 (2.54 - 4.04)         | 1.37 (1.17 - 1.57)        | 2.53 (2.05 - 3.03)        |
| Guinea                | Female | 1.93% (1.42% - 2.6%)       | 1.67% (1.23% - 2.22%)      | 1.19% (0.99% - 1.41%)     | 1.06% (0.88% - 1.27%)     | 0.148 (0.0961 - 0.222)     | 0.23 (0.157 - 0.335)       | 0.0799 (0.0641 - 0.1)     | 0.14 (0.108 - 0.175)      |
| Guinea                | Male   | 15.2% (14% - 16.7%)        | 11.4% (10.2% - 13%)        | 9.15% (8.53% - 9.96%)     | 9.2% (8.56% - 9.97%)      | 0.952 (0.814 - 1.11)       | 1.49 (1.24 - 1.77)         | 0.5 (0.429 - 0.565)       | 0.996 (0.842 - 1.16)      |
| Guinea-Bissau         | Female | 1.37% (1.07% - 1.83%)      | 1.86% (1.26% - 2.55%)      | 1.34% (1.12% - 1.6%)      | 1.18% (0.97% - 1.42%)     | 0.0153 (0.0109 - 0.022)    | 0.0359 (0.023 - 0.0513)    | 0.0138 (0.0107 - 0.0173)  | 0.0225 (0.0174 - 0.0289)  |
| Guinea-Bissau         | Male   | 9.92% (8.8% - 11.1%)       | 13.8% (10.3% - 16.2%)      | 9.86% (8.99% - 10.7%)     | 9.01% (8.18% - 9.83%)     | 0.0969 (0.0807 - 0.114)    | 0.262 (0.189 - 0.331)      | 0.0773 (0.0652 - 0.0907)  | 0.142 (0.113 - 0.171)     |
| Liberia               | Female | 2.14% (1.68% - 2.67%)      | 1.78% (1.31% - 2.43%)      | 2.35% (1.93% - 2.82%)     | 2.28% (1.86% - 2.72%)     | 0.0583 (0.0417 - 0.0759)   | 0.0807 (0.0559 - 0.114)    | 0.0537 (0.041 - 0.0678)   | 0.101 (0.0745 - 0.129)    |
| Liberia               | Male   | 11.2% (10.2% - 12.3%)      | 9.28% (8.24% - 10.6%)      | 13.2% (12.2% - 14.3%)     | 13.1% (12.2% - 14.2%)     | 0.285 (0.232 - 0.335)      | 0.431 (0.335 - 0.555)      | 0.309 (0.257 - 0.372)     | 0.572 (0.459 - 0.7)       |
| Mali                  | Female | 2.82% (2.11% - 3.65%)      | 3.4% (2.51% - 4.5%)        | 1.33% (1.11% - 1.57%)     | 1.18% (0.97% - 1.39%)     | 0.335 (0.232 - 0.48)       | 0.968 (0.676 - 1.37)       | 0.156 (0.122 - 0.192)     | 0.331 (0.257 - 0.414)     |
| Mali                  | Male   | 19.1% (17.8% - 20.6%)      | 19.1% (16.5% - 22.8%)      | 10.1% (9.29% - 11%)       | 10.1% (9.22% - 11%)       | 2.27 (1.89 - 2.68)         | 5.57 (4.41 - 7.01)         | 1.06 (0.892 - 1.23)       | 2.55 (2.12 - 3.04)        |
| Mauritania            | Female | 8.86% (7.29% - 10.6%)      | 7.24% (5.9% - 8.86%)       | 1.44% (1.2% - 1.69%)      | 1.29% (1.07% - 1.56%)     | 0.232 (0.183 - 0.286)      | 0.288 (0.215 - 0.375)      | 0.0324 (0.0255 - 0.04)    | 0.0501 (0.039 - 0.0631)   |
| Mauritania            | Male   | 26.8% (24.6% - 29.4%)      | 21.9% (19.8% - 24.1%)      | 9.24% (8.52% - 10%)       | 8.64% (7.88% - 9.48%)     | 0.594 (0.504 - 0.694)      | 0.867 (0.703 - 1.05)       | 0.171 (0.148 - 0.198)     | 0.305 (0.254 - 0.37)      |
| Niger                 | Female | 1.44% (1.09% - 1.85%)      | 1.07% (0.77% - 1.54%)      | 1.32% (1.12% - 1.6%)      | 1.27% (1.07% - 1.53%)     | 0.212 (0.148 - 0.286)      | 0.433 (0.293 - 0.654)      | 0.166 (0.131 - 0.211)     | 0.448 (0.345 - 0.582)     |
| Niger                 | Male   | 12.5% (11.3% - 13.6%)      | 9.78% (8.52% - 12%)        | 11% (10.2% - 11.9%)       | 10.9% (10.1% - 11.8%)     | 1.67 (1.39 - 2)            | 3.86 (3.09 - 4.86)         | 1.22 (1.03 - 1.42)        | 3.38 (2.78 - 4.06)        |
| Nigeria               | Female | 1% (0.74% - 1.31%)         | 0.5% (0.36% - 0.68%)       | 1% (0.85% - 1.18%)        | 0.97% (0.82% - 1.15%)     | 1.22 (0.852 - 1.78)        | 1.11 (0.762 - 1.61)        | 1.12 (0.908 - 1.38)       | 2.11 (1.68 - 2.68)        |
| Nigeria               | Male   | 5.87% (5.19% - 6.52%)      | 3.38% (2.91% - 3.97%)      | 5.56% (5.14% - 6.03%)     | 5.25% (4.76% - 5.81%)     | 6.14 (5.18 - 7.19)         | 7.39 (5.71 - 9.36)         | 4.79 (4.21 - 5.52)        | 9.72 (8 - 11.6)           |
| Sao Tome and Principe | Female | 1.87% (1.36% - 2.51%)      | 1.61% (1.16% - 2.27%)      | 2.94% (2.5% - 3.46%)      | 2.87% (2.42% - 3.36%)     | 0.002 (0.0014 - 0.0029)    | 0.002 (0.0014 - 0.0028)    | 0.0029 (0.0023 - 0.0035)  | 0.0036 (0.0027 - 0.0047)  |
| Sao Tome and Principe | Male   | 7.44% (6.6% - 8.23%)       | 6.85% (5.9% - 8.28%)       | 18.6% (17.3% - 20.2%)     | 20% (18.6% - 21.7%)       | 0.0078 (0.0064 - 0.0091)   | 0.0085 (0.0065 - 0.011)    | 0.0189 (0.0161 - 0.0217)  | 0.0251 (0.0193 - 0.0313)  |
| Senegal               | Female | 1.5% (1.1% - 2.04%)        | 0.78% (0.54% - 1.17%)      | 0.65% (0.54% - 0.77%)     | 0.65% (0.54% - 0.78%)     | 0.138 (0.0941 - 0.195)     | 0.106 (0.0721 - 0.165)     | 0.0524 (0.0417 - 0.0648)  | 0.0879 (0.0694 - 0.109)   |
| Senegal               | Male   | 12.3% (11.4% - 13.3%)      | 5.75% (5.17% - 6.73%)      | 16% (14.8% - 17.1%)       | 16.9% (15.7% - 18.1%)     | 0.992 (0.844 - 1.13)       | 0.809 (0.666 - 0.985)      | 1.1 (0.954 - 1.25)        | 2.2 (1.84 - 2.57)         |
| Sierra Leone          | Female | 7.08% (5.73% - 8.58%)      | 4.69% (3.53% - 6.33%)      | 2.74% (2.29% - 3.3%)      | 2.33% (1.87% - 2.93%)     | 0.351 (0.269 - 0.464)      | 0.375 (0.269 - 0.523)      | 0.104 (0.0855 - 0.13)     | 0.177 (0.137 - 0.23)      |
| Sierra Leone          | Male   | 24.1% (22.7% - 25.5%)      | 18.1% (16.2% - 20.5%)      | 6.87% (6.29% - 7.5%)      | 6.47% (5.88% - 7.18%)     | 1.02 (0.9 - 1.15)          | 1.4 (1.18 - 1.67)          | 0.213 (0.186 - 0.243)     | 0.43 (0.354 - 0.515)      |
| Togo                  | Female | 2.11% (1.62% - 2.74%)      | 1.37% (1.04% - 1.79%)      | 1.54% (1.26% - 1.85%)     | 1.52% (1.24% - 1.84%)     | 0.0881 (0.0635 - 0.124)    | 0.0899 (0.0661 - 0.126)    | 0.0667 (0.0521 - 0.0849)  | 0.101 (0.0786 - 0.128)    |
| Togo                  | Male   | 12.4% (11.2% - 13.4%)      | 8.32% (7.47% - 9.25%)      | 11.8% (10.8% - 12.7%)     | 11.8% (10.8% - 12.8%)     | 0.481 (0.397 - 0.562)      | 0.545 (0.438 - 0.659)      | 0.429 (0.355 - 0.501)     | 0.733 (0.58 - 0.876)      |















Supplementary Results Table S2. Cumulative all-age counts and age-standardised rates of years of life lost (YLLs) between 2022 to 2050 by location, sex, and scenario

| Location              | Sex    | All-Age Count (Millions) |                                                     |                                                     |                                                                            | Age-Standardized Rate (per 100,000) |                                                     |                                                     |                                                                            |
|-----------------------|--------|--------------------------|-----------------------------------------------------|-----------------------------------------------------|----------------------------------------------------------------------------|-------------------------------------|-----------------------------------------------------|-----------------------------------------------------|----------------------------------------------------------------------------|
|                       |        | Reference                | Difference between Reference and Elimination - 2023 | Difference between Reference and Elimination - 2050 | Difference between Reference and Elimination - 2050 and Elimination - 2023 | Reference                           | Difference between Reference and Elimination - 2023 | Difference between Reference and Elimination - 2050 | Difference between Reference and Elimination - 2050 and Elimination - 2023 |
|                       |        |                          |                                                     |                                                     |                                                                            |                                     |                                                     |                                                     |                                                                            |
| Cabo Verde            | Female | 1.08<br>(0.849-1.32)     | 0.00625<br>(0.00478-0.00795)                        | 0.00194<br>(0.00146-0.00253)                        | 0.00431<br>(0.00332-0.0054)                                                | 10300<br>(8260-12600)               | 60.7<br>(47.6-75.7)                                 | 17.8<br>(13.6-22.7)                                 | 42.9<br>(33.9-53.2)                                                        |
| Cabo Verde            | Male   | 1.91<br>(1.49-2.35)      | 0.0506<br>(0.0395-0.0614)                           | 0.0177<br>(0.0136-0.0223)                           | 0.0329<br>(0.0261-0.0392)                                                  | 21100<br>(17200-25200)              | 57.2<br>(45.7-68.6)                                 | 17.7<br>(14.0-21.6)                                 | 39.6<br>(31.8-46.9)                                                        |
| Cameroon              | Female | 136<br>(99.5-199)        | 0.117<br>(0.0789-0.16)                              | 0.0247<br>(0.0183-0.0326)                           | 0.0919<br>(0.0601-0.128)                                                   | 24200<br>(18600-34800)              | 40.7<br>(29.3-55.6)                                 | 13.7<br>(10.8-17.2)                                 | 27.1<br>(18.7-38.1)                                                        |
| Cameroon              | Male   | 176<br>(128-239)         | 1.92<br>(1.25-2.69)                                 | 0.747<br>(0.459-1.06)                               | 1.17<br>(0.779-1.6)                                                        | 31900<br>(24900-42500)              | 52.1<br>(34.0-71.9)                                 | 17.0<br>(10.4-24.1)                                 | 35.2<br>(23.8-47.9)                                                        |
| Chad                  | Female | 153<br>(113-201)         | 0.138<br>(0.0987-0.186)                             | 0.0172<br>(0.0123-0.0234)                           | 0.121<br>(0.0863-0.162)                                                    | 30900<br>(24400-39700)              | 94.1<br>(68.3-126)                                  | 12<br>(8.68-16)                                     | 82.1<br>(59.5-110)                                                         |
| Chad                  | Male   | 187<br>(134-248)         | 1.02<br>(0.733-1.31)                                | 0.358<br>(0.248-0.475)                              | 0.661<br>(0.477-0.837)                                                     | 38100<br>(29200-48900)              | 65.7<br>(47.5-86.1)                                 | 188<br>(136-246)                                    | 469<br>(342-616)                                                           |
| Côte d'Ivoire         | Female | 112<br>(79.8-185)        | 0.279<br>(0.18-0.398)                               | 0.0732<br>(0.045-0.105)                             | 0.206<br>(0.134-0.293)                                                     | 22500<br>(16800-29900)              | 87.5<br>(57-126)                                    | 21.8<br>(13.7-31.8)                                 | 65.8<br>(42.9-94)                                                          |
| Côte d'Ivoire         | Male   | 153<br>(116-202)         | 2.3<br>(1.47-3.09)                                  | 0.643<br>(0.406-0.897)                              | 1.66<br>(1.12-2.2)                                                         | 30300<br>(23400-40600)              | 66.9<br>(44.7-92.5)                                 | 177<br>(119-245)                                    | 491<br>(327-679)                                                           |
| Gambia                | Female | 8.21<br>(6.46-10.2)      | 0.00894<br>(0.00646-0.0121)                         | 0.00384<br>(0.00267-0.00524)                        | 0.00511<br>(0.00378-0.00677)                                               | 21900<br>(17700-26700)              | 38.3<br>(27.9-50.5)                                 | 14.2<br>(10.1-19.2)                                 | 24.1<br>(17.3-31.3)                                                        |
| Gambia                | Male   | 10.5<br>(8.41-13)        | 0.193<br>(0.148-0.251)                              | 0.0694<br>(0.0508-0.0942)                           | 0.123<br>(0.0966-0.157)                                                    | 29500<br>(24300-35400)              | 79.7<br>(60.6-101)                                  | 23.5<br>(17.8-30.5)                                 | 56.2<br>(41.7-70.5)                                                        |
| Ghana                 | Female | 128<br>(94.4-186)        | 0.347<br>(0.249-0.461)                              | 0.0878<br>(0.0624-0.118)                            | 0.259<br>(0.181-0.346)                                                     | 21800<br>(17100-28000)              | 82.4<br>(60-110)                                    | 22.2<br>(16.3-29.4)                                 | 60.2<br>(43.6-81.2)                                                        |
| Ghana                 | Male   | 168<br>(126-225)         | 2.42<br>(1.83-3.03)                                 | 1.4<br>(1.04-1.79)                                  | 1.82<br>(1.38-2.25)                                                        | 31700<br>(25200-40300)              | 716<br>(570-897)                                    | 409<br>(321-512)                                    | 307<br>(242-386)                                                           |
| Guinea                | Female | 79.9<br>(56.9-134)       | 0.145<br>(0.106-0.191)                              | 0.0464<br>(0.0334-0.0625)                           | 0.0985<br>(0.0724-0.129)                                                   | 29300<br>(21500-44900)              | 108<br>(78.7-145)                                   | 32.8<br>(23.7-44.7)                                 | 74.8<br>(55.1-101)                                                         |
| Guinea                | Male   | 90.2<br>(65.8-159)       | 1.25<br>(0.927-1.6)                                 | 0.466<br>(0.334-0.612)                              | 0.786<br>(0.586-0.987)                                                     | 33900<br>(25300-51800)              | 98.8<br>(72.8-130)                                  | 329<br>(241-435)                                    | 659<br>(486-860)                                                           |
| Guinea-Bissau         | Female | 10.4<br>(8.14-13.7)      | 0.0228<br>(0.0163-0.0302)                           | 0.011<br>(0.00771-0.0146)                           | 0.0118<br>(0.00848-0.0156)                                                 | 29800<br>(23900-39400)              | 101<br>(74.3-135)                                   | 43.2<br>(31.1-59.2)                                 | 57.6<br>(43.1-76.4)                                                        |
| Guinea-Bissau         | Male   | 13.7<br>(10.8-17.9)      | 0.199<br>(0.15-0.259)                               | 0.118<br>(0.0868-0.156)                             | 0.0813<br>(0.0601-0.102)                                                   | 42900<br>(34800-57500)              | 107<br>(83.0-140)                                   | 56.1<br>(43.2-75.6)                                 | 50.5<br>(39.7-64.9)                                                        |
| Liberia               | Female | 23.9<br>(16.2-33.5)      | 0.0637<br>(0.0403-0.0883)                           | 0.0257<br>(0.016-0.0364)                            | 0.038<br>(0.0244-0.0522)                                                   | 26800<br>(19200-38600)              | 95.1<br>(64.2-136)                                  | 34.5<br>(22.6-50.4)                                 | 60.6<br>(41.3-85.7)                                                        |
| Liberia               | Male   | 27.5<br>(18.7-42)        | 0.364<br>(0.242-0.484)                              | 0.18<br>(0.111-0.244)                               | 0.185<br>(0.123-0.24)                                                      | 29500<br>(21200-43200)              | 518<br>(362-707)                                    | 220<br>(142-310)                                    | 297<br>(211-404)                                                           |
| Mali                  | Female | 161<br>(115-247)         | 0.273<br>(0.194-0.366)                              | 0.142<br>(0.0981-0.197)                             | 0.131<br>(0.093-0.174)                                                     | 28300<br>(22500-37400)              | 123<br>(88.3-167)                                   | 55.2<br>(38.8-75.2)                                 | 67.8<br>(49.1-91.4)                                                        |
| Mali                  | Male   | 195<br>(144-260)         | 1.7<br>(1.31-2.12)                                  | 0.84<br>(0.649-1.06)                                | 0.857<br>(0.667-1.06)                                                      | 31800<br>(25600-39700)              | 84.7<br>(67.4-108)                                  | 41.7<br>(33.2-53.3)                                 | 430<br>(339-549)                                                           |
| Mauritania            | Female | 13.6<br>(10.8-17.5)      | 0.0565<br>(0.0413-0.0787)                           | 0.00987<br>(0.00697-0.014)                          | 0.0466<br>(0.0343-0.0647)                                                  | 18700<br>(15000-23800)              | 88.5<br>(63.8-123)                                  | 14<br>(9.87-20.1)                                   | 74.5<br>(53.9-104)                                                         |
| Mauritania            | Male   | 15.4<br>(12.2-19.5)      | 0.232<br>(0.171-0.307)                              | 0.062<br>(0.042-0.087)                              | 0.17<br>(0.128-0.222)                                                      | 20900<br>(16600-26500)              | 436<br>(321-588)                                    | 94.5<br>(67.5-132)                                  | 341<br>(253-458)                                                           |
| Niger                 | Female | 203<br>(141-347)         | 0.094<br>(0.0642-0.13)                              | 0.0217<br>(0.0142-0.0307)                           | 0.0723<br>(0.0505-0.0998)                                                  | 30400<br>(22200-45800)              | 38.6<br>(26.4-54.3)                                 | 8.59<br>(5.82-12)                                   | 30<br>(20.8-42.4)                                                          |
| Niger                 | Male   | 227<br>(153-394)         | 0.784<br>(0.509-1.08)                               | 0.207<br>(0.121-0.293)                              | 0.577<br>(0.355-0.778)                                                     | 33500<br>(24000-48800)              | 379<br>(273-500)                                    | 111<br>(82.9-141)                                   | 268<br>(188-360)                                                           |
| Nigeria               | Female | 1220<br>(880-1800)       | 0.755<br>(0.514-1.04)                               | 0.244<br>(0.16-0.342)                               | 0.511<br>(0.35-0.696)                                                      | 25200<br>(19000-36100)              | 27.7<br>(18.5-39.4)                                 | 8.57<br>(5.66-12.4)                                 | 19.1<br>(12.8-27)                                                          |
| Nigeria               | Male   | 1380<br>(1020-2120)      | 5.48<br>(3.71-7.36)                                 | 1.11<br>(0.727-1.53)                                | 4.37<br>(3-5.82)                                                           | 29800<br>(22700-40100)              | 224<br>(151-310)                                    | 36.1<br>(24-50.1)                                   | 188<br>(130-260)                                                           |
| Sao Tome and Principe | Female | 0.468<br>(0.373-0.594)   | 0.00213<br>(0.00166-0.00275)                        | 0.00118<br>(0.00098-0.00154)                        | 0.000988<br>(0.00075-0.00124)                                              | 15600<br>(12600-19000)              | 79.7<br>(62.5-99.7)                                 | 40.9<br>(31.9-51.7)                                 | 38.8<br>(30.7-48.5)                                                        |
| Sao Tome and Principe | Male   | 0.591<br>(0.477-0.737)   | 0.0158<br>(0.0129-0.0192)                           | 0.00807<br>(0.00647-0.0101)                         | 0.00773<br>(0.00648-0.00922)                                               | 19900<br>(16800-23600)              | 605<br>(516-705)                                    | 276<br>(226-331)                                    | 329<br>(287-380)                                                           |
| Senegal               | Female | 48.7<br>(39.4-60.2)      | 0.0496<br>(0.0362-0.0652)                           | 0.00533<br>(0.00384-0.00714)                        | 0.0443<br>(0.0324-0.0581)                                                  | 18100<br>(14900-22300)              | 23.9<br>(17.4-32.3)                                 | 2.45<br>(1.76-3.35)                                 | 21.4<br>(15.6-29)                                                          |
| Senegal               | Male   | 60.3<br>(49.2-74.2)      | 0.788<br>(0.6-1)                                    | 0.253<br>(0.186-0.331)                              | 0.535<br>(0.415-0.67)                                                      | 23200<br>(19000-28600)              | 398<br>(300-512)                                    | 106<br>(78.9-138)                                   | 293<br>(223-373)                                                           |
| Sierra Leone          | Female | 48<br>(34.5-69.2)        | 0.149<br>(0.0843-0.215)                             | 0.0285<br>(0.0163-0.0415)                           | 0.12<br>(0.07-0.174)                                                       | 29500<br>(22100-42700)              | 126<br>(76.5-186)                                   | 22.7<br>(13.6-34.2)                                 | 103<br>(62.9-151)                                                          |
| Sierra Leone          | Male   | 55<br>(39.3-75.5)        | 0.736<br>(0.5-0.965)                                | 0.319<br>(0.205-0.438)                              | 0.417<br>(0.297-0.533)                                                     | 33100<br>(24300-47100)              | 684<br>(476-929)                                    | 247<br>(163-343)                                    | 437<br>(307-585)                                                           |
| Togo                  | Female | 32.7<br>(24.2-46.9)      | 0.132<br>(0.094-0.175)                              | 0.0753<br>(0.0531-0.101)                            | 0.0566<br>(0.0406-0.0726)                                                  | 22800<br>(16800-32600)              | 124<br>(85.5-170)                                   | 64.9<br>(43.9-90.4)                                 | 59<br>(41.7-81)                                                            |
| Togo                  | Male   | 41.3<br>(30.4-59.8)      | 0.712<br>(0.479-0.925)                              | 0.347<br>(0.221-0.46)                               | 0.365<br>(0.255-0.465)                                                     | 32100<br>(23800-43300)              | 849<br>(561-1150)                                   | 378<br>(242-517)                                    | 471<br>(318-632)                                                           |

Supplementary Results Table S3. Life expectancy at birth by location, sex, and scenario

| Location                                         | Sex    | 2050                |                                |                                | Change between 2022 and 2050 |                     |                     |
|--------------------------------------------------|--------|---------------------|--------------------------------|--------------------------------|------------------------------|---------------------|---------------------|
|                                                  |        | Reference           | Difference between             |                                | Reference                    | Elimination - 2023  | Elimination - 2050  |
|                                                  |        |                     | Elimination-2023 and Reference | Elimination-2050 and Reference |                              |                     |                     |
| Global                                           | Male   | 76.1<br>(73.6-78)   | 1.51<br>(1.45-1.58)            | 0.957<br>(0.912-1)             | 5.07<br>(2.79-6.67)          | 6.58<br>(4.27-8.23) | 6.03<br>(3.73-7.66) |
| Global                                           | Female | 80.6<br>(78.1-82.6) | 0.414<br>(0.395-0.435)         | 0.213<br>(0.197-0.23)          | 4.39<br>(1.82-6.16)          | 4.81<br>(2.22-6.58) | 4.61<br>(2.02-6.38) |
| Central Europe, Eastern Europe, and Central Asia | Male   | 75.6<br>(73.5-77.2) | 1.87<br>(1.81-1.95)            | 1.08<br>(1.04-1.12)            | 6.06<br>(4.04-7.53)          | 7.93<br>(5.92-9.42) | 7.13<br>(5.14-8.61) |
| Central Europe, Eastern Europe, and Central Asia | Female | 82.1<br>(79.9-84.1) | 0.326<br>(0.309-0.343)         | 0.118<br>(0.11-0.127)          | 4.72<br>(2.61-6.4)           | 5.04<br>(2.94-6.73) | 4.84<br>(2.73-6.52) |
| Central Asia                                     | Male   | 75.9<br>(72-78.8)   | 1.94<br>(1.85-2.04)            | 1.28<br>(1.22-1.35)            | 6.95<br>(3.23-9.75)          | 8.88<br>(5.16-11.7) | 8.23<br>(4.5-11.1)  |
| Central Asia                                     | Female | 81.6<br>(77.7-84.8) | 0.144<br>(0.126-0.166)         | 0.0389<br>(0.0298-0.0476)      | 6.25<br>(2.56-9.4)           | 6.4<br>(2.72-9.54)  | 6.29<br>(2.6-9.44)  |
| Armenia                                          | Male   | 79.8<br>(77.6-81.7) | 3.38<br>(3.06-3.76)            | 2.34<br>(2.12-2.6)             | 7.05<br>(4.59-10.1)          | 10.4<br>(7.81-13.6) | 9.39<br>(6.8-12.5)  |
| Armenia                                          | Female | 84.8<br>(82.9-86.6) | 0.104<br>(0.094-0.114)         | 0.0198<br>(0.0175-0.0223)      | 5.34<br>(3.14-8.14)          | 5.45<br>(3.24-8.24) | 5.36<br>(3.16-8.16) |
| Azerbaijan                                       | Male   | 76.7<br>(73.2-79.6) | 2.75<br>(2.52-3.04)            | 2.06<br>(1.87-2.29)            | 6.95<br>(3.78-9.66)          | 9.7<br>(6.36-12.5)  | 9.01<br>(5.67-11.8) |
| Azerbaijan                                       | Female | 81.8<br>(78-85.2)   | 0.0492<br>(0.0415-0.0614)      | 0.00714<br>(0.00599-0.00901)   | 6.52<br>(3.01-9.64)          | 6.57<br>(3.06-9.68) | 6.52<br>(3.02-9.64) |
| Georgia                                          | Male   | 73.3<br>(71.7-74.8) | 3.1<br>(2.87-3.4)              | 2.11<br>(1.96-2.29)            | 4<br>(2.43-5.24)             | 7.1<br>(5.4-8.53)   | 6.11<br>(4.47-7.45) |
| Georgia                                          | Female | 84.4<br>(82.4-86.3) | 0.303<br>(0.285-0.319)         | 0.0632<br>(0.0583-0.0693)      | 5.81<br>(3.84-7.49)          | 6.11<br>(4.14-7.79) | 5.87<br>(3.91-7.55) |
| Kazakhstan                                       | Male   | 75.1<br>(72.4-77)   | 1.59<br>(1.47-1.71)            | 0.785<br>(0.725-0.847)         | 9.05<br>(6.43-11.6)          | 10.6<br>(8.05-13.1) | 9.83<br>(7.24-12.3) |
| Kazakhstan                                       | Female | 81.7<br>(79.1-83.9) | 0.124<br>(0.11-0.146)          | 0.0197<br>(0.0167-0.0243)      | 7.68<br>(5.05-10.3)          | 7.8<br>(5.19-10.5)  | 7.69<br>(5.08-10.4) |
| Kyrgyzstan                                       | Male   | 74.9<br>(71.3-78.2) | 3.12<br>(2.92-3.34)            | 2.27<br>(2.12-2.44)            | 7.48<br>(3.74-10.6)          | 10.6<br>(6.82-13.8) | 9.75<br>(5.99-12.9) |
| Kyrgyzstan                                       | Female | 81.6<br>(78.3-84.9) | 0.3<br>(0.258-0.349)           | 0.0668<br>(0.0555-0.0816)      | 6.72<br>(3.11-10)            | 7.02<br>(3.45-10.3) | 6.78<br>(3.19-10.1) |
| Mongolia                                         | Male   | 70.3<br>(66.3-73.8) | 2.86<br>(2.63-3.11)            | 2.07<br>(1.91-2.25)            | 3.18<br>(-0.527-5.97)        | 6.04<br>(2.28-8.89) | 5.25<br>(1.54-8.09) |
| Mongolia                                         | Female | 80.4<br>(76.9-83.3) | 0.456<br>(0.421-0.494)         | 0.219<br>(0.199-0.241)         | 4.39<br>(1.08-6.93)          | 4.85<br>(1.55-7.37) | 4.61<br>(1.31-7.14) |
| Tajikistan                                       | Male   | 77.8<br>(74-81.4)   | 1.04<br>(0.926-1.16)           | 0.632<br>(0.56-0.709)          | 6.46<br>(2.44-10.1)          | 7.5<br>(3.56-11.1)  | 7.1<br>(3.09-10.8)  |
| Tajikistan                                       | Female | 80.3<br>(75.3-84.4) | 0.133<br>(0.11-0.166)          | 0.0461<br>(0.0366-0.0613)      | 5.49<br>(1.22-9.63)          | 5.62<br>(1.38-9.74) | 5.53<br>(1.28-9.66) |
| Turkmenistan                                     | Male   | 73.9<br>(67.8-78.9) | 1.08<br>(0.988-1.21)           | 0.545<br>(0.506-0.606)         | 7.21<br>(2.26-11.3)          | 8.29<br>(3.4-12.4)  | 7.75<br>(2.82-11.9) |
| Turkmenistan                                     | Female | 80.8<br>(74.3-86.3) | 0.143<br>(0.11-0.189)          | 0.03<br>(0.0206-0.0464)        | 7.29<br>(2.09-12.4)          | 7.43<br>(2.43-12.5) | 7.32<br>(2.13-12.4) |
| Uzbekistan                                       | Male   | 76.5<br>(71.3-80.5) | 1.64<br>(1.51-1.83)            | 1.12<br>(1.04-1.25)            | 5.61<br>(1.3-9.18)           | 7.25<br>(3.01-10.8) | 6.73<br>(2.48-10.3) |
| Uzbekistan                                       | Female | 81.3<br>(76.6-85.6) | 0.111<br>(0.0937-0.141)        | 0.0317<br>(0.0262-0.0414)      | 5.48<br>(1.03-9.34)          | 5.59<br>(1.16-9.44) | 5.51<br>(1.07-9.36) |
| Central Europe                                   | Male   | 77.7<br>(76.7-78.5) | 1.69<br>(1.59-1.82)            | 0.95<br>(0.893-1.02)           | 4.52<br>(3.83-5.09)          | 6.21<br>(5.41-6.86) | 5.47<br>(4.73-6.08) |
| Central Europe                                   | Female | 83.7<br>(82.6-84.6) | 0.701<br>(0.654-0.758)         | 0.295<br>(0.274-0.32)          | 3.81<br>(2.84-4.58)          | 4.51<br>(3.51-5.32) | 4.1<br>(3.13-4.89)  |
| Albania                                          | Male   | 79.7<br>(77.6-81.4) | 2.88<br>(2.56-3.29)            | 2.21<br>(1.96-2.53)            | 4.29<br>(2.39-5.79)          | 7.16<br>(5.15-8.78) | 6.49<br>(4.48-8.06) |
| Albania                                          | Female | 83.1<br>(81.2-84.9) | 0.666<br>(0.587-0.756)         | 0.283<br>(0.248-0.327)         | 3.39<br>(1.55-4.94)          | 4.06<br>(2.19-5.69) | 3.68<br>(1.82-5.26) |
| Bosnia and Herzegovina                           | Male   | 80<br>(77.7-82.8)   | 2.93<br>(2.52-3.34)            | 1.91<br>(1.63-2.18)            | 5.28<br>(3.42-7.19)          | 8.21<br>(6.1-10.2)  | 7.19<br>(5.16-9.19) |
| Bosnia and Herzegovina                           | Female | 84.4<br>(81.7-87)   | 1.15<br>(1.02-1.31)            | 0.477<br>(0.414-0.555)         | 4.63<br>(2.22-6.43)          | 5.79<br>(3.25-7.62) | 5.11<br>(2.63-6.93) |
| Bulgaria                                         | Male   | 74<br>(72.2-75.6)   | 1.52<br>(1.39-1.67)            | 0.78<br>(0.701-0.869)          | 5.08<br>(3.92-6.18)          | 6.59<br>(5.49-7.71) | 5.86<br>(4.76-6.95) |
| Bulgaria                                         | Female | 80.4<br>(78.9-81.9) | 0.619<br>(0.547-0.695)         | 0.275<br>(0.239-0.318)         | 4.41<br>(3.31-5.63)          | 5.03<br>(3.94-6.25) | 4.69<br>(3.59-5.9)  |
| Croatia                                          | Male   | 79.3<br>(78.3-80.4) | 1.92<br>(1.72-2.15)            | 1.16<br>(1.05-1.29)            | 4.5<br>(3.73-5.29)           | 6.43<br>(5.56-7.24) | 5.67<br>(4.83-6.47) |
| Croatia                                          | Female | 84.1<br>(83-85.1)   | 0.711<br>(0.636-0.805)         | 0.294<br>(0.256-0.34)          | 3.35<br>(2.47-4.22)          | 4.06<br>(3.14-4.97) | 3.65<br>(2.74-4.54) |
| Czechia                                          | Male   | 80.4<br>(79.2-81.6) | 1.5<br>(1.37-1.64)             | 0.817<br>(0.752-0.894)         | 3.66<br>(2.89-4.32)          | 5.16<br>(4.3-5.87)  | 4.48<br>(3.66-5.13) |
| Czechia                                          | Female | 85.4<br>(84.1-86.8) | 0.596<br>(0.539-0.663)         | 0.204<br>(0.182-0.231)         | 2.92<br>(1.88-3.89)          | 3.51<br>(2.44-4.53) | 3.12<br>(2.07-4.11) |
| Hungary                                          | Male   | 78<br>(76.7-79.2)   | 1.54<br>(1.39-1.7)             | 0.76<br>(0.689-0.84)           | 4.82<br>(4-5.53)             | 6.36<br>(5.49-7.08) | 5.58<br>(4.73-6.29) |
| Hungary                                          | Female | 82.9<br>(81.5-84.2) | 0.716<br>(0.632-0.799)         | 0.255<br>(0.223-0.288)         | 3.21<br>(2.13-4.09)          | 3.92<br>(2.83-4.83) | 3.46<br>(2.38-4.35) |
| Montenegro                                       | Male   | 76.7<br>(75.4-78)   | 2.01<br>(1.76-2.28)            | 1.29<br>(1.13-1.46)            | 4.4<br>(3.6-5.34)            | 6.41<br>(5.52-7.34) | 5.69<br>(4.84-6.61) |
| Montenegro                                       | Female | 81.1<br>(80-82.3)   | 0.807<br>(0.721-0.898)         | 0.406<br>(0.363-0.463)         | 3.34<br>(2.36-4.43)          | 4.15<br>(3.13-5.23) | 3.75<br>(2.76-4.81) |
| North Macedonia                                  | Male   | 77.3<br>(75.7-78.9) | 1.9<br>(1.67-2.18)             | 1.15<br>(1.01-1.31)            | 6.34<br>(4.71-8.71)          | 8.24<br>(6.55-10.6) | 7.49<br>(5.8-9.83)  |
| North Macedonia                                  | Female | 80<br>(78.5-81.4)   | 0.729<br>(0.646-0.82)          | 0.301<br>(0.264-0.343)         | 5.19<br>(3.66-7.08)          | 5.92<br>(4.41-7.76) | 5.49<br>(3.97-7.36) |
| Poland                                           | Male   | 77.5<br>(76.4-78.7) | 1.63<br>(1.49-1.82)            | 0.883<br>(0.805-0.978)         | 4.07<br>(3.44-4.85)          | 5.7<br>(5.02-6.48)  | 4.95<br>(4.32-5.73) |
| Poland                                           | Female | 84.8<br>(83.9-85.9) | 0.744<br>(0.663-0.837)         | 0.309<br>(0.272-0.353)         | 3.68<br>(2.9-4.47)           | 4.43<br>(3.6-5.21)  | 3.99<br>(3.19-4.78) |
| Romania                                          | Male   | 76.2<br>(74.6-77.8) | 1.64<br>(1.51-1.79)            | 0.877<br>(0.807-0.953)         | 4.49<br>(3.21-5.45)          | 6.13<br>(4.76-7.1)  | 5.37<br>(4.05-6.31) |
| Romania                                          | Female | 83<br>(81.2-84.6)   | 0.541<br>(0.491-0.59)          | 0.221<br>(0.196-0.246)         | 4.02<br>(2.55-5.29)          | 4.56<br>(3.1-5.82)  | 4.24<br>(2.79-5.51) |
| Serbia                                           | Male   | 77.3<br>(75.8-78.7) | 1.8<br>(1.6-2.03)              | 1.01<br>(0.889-1.13)           | 4.27<br>(3.42-5.2)           | 6.07<br>(5.13-7.01) | 5.28<br>(4.4-6.23)  |
| Serbia                                           | Female | 81.5<br>(80.2-82.7) | 1.09<br>(0.977-1.22)           | 0.549<br>(0.489-0.625)         | 3.68<br>(2.55-4.78)          | 4.76<br>(3.65-5.95) | 4.23<br>(3.13-5.38) |
| Slovakia                                         | Male   | 78.2<br>(76.8-79.6) | 1.66<br>(1.48-1.84)            | 1.06<br>(0.946-1.17)           | 4.49<br>(3.4-5.4)            | 6.15<br>(4.97-7.15) | 5.55<br>(4.38-6.51) |
| Slovakia                                         | Female | 83.8<br>(82.3-85.2) | 0.321<br>(0.282-0.364)         | 0.127<br>(0.11-0.147)          | 3.56<br>(2.24-4.73)          | 3.88<br>(2.55-5.06) | 3.68<br>(2.37-4.87) |

Supplementary Results Table S3. Life expectancy at birth by location, sex, and scenario

| Location                  | Sex    | 2050                |                                |                                | Change between 2022 and 2050 |                      |                      |
|---------------------------|--------|---------------------|--------------------------------|--------------------------------|------------------------------|----------------------|----------------------|
|                           |        | Reference           | Difference between             |                                | Reference                    | Elimination - 2023   | Elimination - 2050   |
|                           |        |                     | Elimination-2023 and Reference | Elimination-2050 and Reference |                              |                      |                      |
| Slovenia                  | Male   | 82.2<br>(81.3-83.1) | 0.99<br>(0.88-1.1)             | 0.395<br>(0.348-0.446)         | 3.66<br>(3.24-4.07)          | 4.65<br>(4.15-5.07)  | 4.05<br>(3.6-4.46)   |
| Slovenia                  | Female | 87.5<br>(86.4-88.5) | 0.461<br>(0.394-0.532)         | 0.17<br>(0.14-0.203)           | 2.7<br>(2.1-3.23)            | 3.16<br>(2.53-3.69)  | 2.87<br>(2.26-3.4)   |
| Eastern Europe            | Male   | 74.7<br>(72.4-76.7) | 1.95<br>(1.86-2.05)            | 1.06<br>(1.01-1.12)            | 6.48<br>(4.65-7.97)          | 8.43<br>(6.62-9.98)  | 7.54<br>(5.76-9.05)  |
| Eastern Europe            | Female | 81.9<br>(79.6-84)   | 0.226<br>(0.202-0.262)         | 0.0736<br>(0.062-0.09)         | 4.74<br>(2.81-6.5)           | 4.97<br>(3.07-6.7)   | 4.82<br>(2.9-6.56)   |
| Belarus                   | Male   | 73.6<br>(70.5-76.3) | 3.01<br>(2.8-3.26)             | 2.16<br>(2-2.33)               | 6.57<br>(4.14-8.52)          | 9.58<br>(7.08-11.6)  | 8.72<br>(6.24-10.7)  |
| Belarus                   | Female | 82.9<br>(80-85.4)   | 0.175<br>(0.148-0.222)         | 0.0425<br>(0.0337-0.059)       | 6.24<br>(3.65-8.66)          | 6.42<br>(3.88-8.82)  | 6.29<br>(3.72-8.7)   |
| Estonia                   | Male   | 79.4<br>(78.2-80.7) | 1.09<br>(1-1.21)               | 0.497<br>(0.457-0.547)         | 5.78<br>(5.03-6.44)          | 6.88<br>(6.09-7.57)  | 6.28<br>(5.52-6.95)  |
| Estonia                   | Female | 86<br>(84.9-87.1)   | 0.285<br>(0.255-0.322)         | 0.103<br>(0.0904-0.117)        | 4.26<br>(3.33-5.15)          | 4.54<br>(3.62-5.45)  | 4.36<br>(3.43-5.25)  |
| Latvia                    | Male   | 75.9<br>(74.5-77.4) | 1.69<br>(1.57-1.82)            | 0.885<br>(0.819-0.949)         | 6.3<br>(5.05-7.74)           | 7.98<br>(6.74-9.45)  | 7.18<br>(5.95-8.65)  |
| Latvia                    | Female | 83.8<br>(82.4-85.1) | 0.323<br>(0.294-0.354)         | 0.113<br>(0.102-0.127)         | 5.28<br>(3.81-6.92)          | 5.6<br>(4.13-7.24)   | 5.39<br>(3.93-7.03)  |
| Lithuania                 | Male   | 75<br>(73.6-76.4)   | 1.82<br>(1.69-1.96)            | 1.08<br>(0.998-1.16)           | 4.74<br>(3.6-5.81)           | 6.56<br>(5.37-7.7)   | 5.82<br>(4.66-6.93)  |
| Lithuania                 | Female | 83.6<br>(82.2-85.1) | 0.279<br>(0.249-0.309)         | 0.111<br>(0.0964-0.124)        | 3.96<br>(2.69-5.23)          | 4.24<br>(2.97-5.52)  | 4.07<br>(2.81-5.34)  |
| Republic of Moldova       | Male   | 76.6<br>(73-79.3)   | 2.67<br>(2.53-2.82)            | 1.6<br>(1.51-1.69)             | 6.12<br>(2.82-8.14)          | 8.8<br>(5.49-10.9)   | 7.72<br>(4.46-9.77)  |
| Republic of Moldova       | Female | 84.9<br>(80.9-87.9) | 0.218<br>(0.198-0.251)         | 0.0242<br>(0.0198-0.033)       | 6.08<br>(2.38-8.7)           | 6.3<br>(2.61-8.9)    | 6.1<br>(2.41-8.72)   |
| Russian Federation        | Male   | 75.1<br>(73.1-76.9) | 1.98<br>(1.87-2.12)            | 1.04<br>(0.977-1.12)           | 6.94<br>(5.43-8.3)           | 8.92<br>(7.42-10.3)  | 7.98<br>(6.51-9.35)  |
| Russian Federation        | Female | 82<br>(80-83.9)     | 0.242<br>(0.212-0.277)         | 0.0826<br>(0.0681-0.102)       | 4.97<br>(3.27-6.5)           | 5.21<br>(3.53-6.73)  | 5.05<br>(3.37-6.58)  |
| Ukraine                   | Male   | 73.3<br>(68.2-78.3) | 1.64<br>(1.46-1.8)             | 0.863<br>(0.785-0.936)         | 4.77<br>(2.04-7.2)           | 6.41<br>(3.67-8.93)  | 5.63<br>(2.91-8.11)  |
| Ukraine                   | Female | 81<br>(76.6-85.6)   | 0.168<br>(0.128-0.223)         | 0.0421<br>(0.0313-0.0597)      | 3.56<br>(0.723-6.28)         | 3.73<br>(0.916-6.42) | 3.6<br>(0.775-6.32)  |
| High-income               | Male   | 81.5<br>(81.1-81.7) | 1.05<br>(1.01-1.1)             | 0.524<br>(0.505-0.547)         | 2.64<br>(2.31-2.92)          | 3.69<br>(3.33-3.98)  | 3.17<br>(2.81-3.45)  |
| High-income               | Female | 85.4<br>(85-85.8)   | 0.594<br>(0.573-0.614)         | 0.232<br>(0.224-0.239)         | 1.57<br>(1.17-1.91)          | 2.16<br>(1.75-2.51)  | 1.8<br>(1.4-2.14)    |
| Australasia               | Male   | 83.4<br>(83-83.7)   | 0.504<br>(0.481-0.529)         | 0.194<br>(0.184-0.204)         | 2.35<br>(1.98-2.62)          | 2.85<br>(2.47-3.13)  | 2.54<br>(2.17-2.82)  |
| Australasia               | Female | 86.6<br>(86.2-87)   | 0.41<br>(0.39-0.434)           | 0.105<br>(0.1-0.111)           | 1.43<br>(0.974-1.75)         | 1.84<br>(1.38-2.17)  | 1.54<br>(1.08-1.86)  |
| Australia                 | Male   | 83.5<br>(83.1-83.8) | 0.434<br>(0.413-0.458)         | 0.133<br>(0.126-0.14)          | 2.3<br>(1.92-2.6)            | 2.74<br>(2.35-3.03)  | 2.43<br>(2.06-2.73)  |
| Australia                 | Female | 86.9<br>(86.4-87.3) | 0.374<br>(0.353-0.398)         | 0.0856<br>(0.0806-0.0911)      | 1.42<br>(0.951-1.74)         | 1.79<br>(1.31-2.12)  | 1.5<br>(1.04-1.82)   |
| New Zealand               | Male   | 83<br>(82.6-83.4)   | 0.858<br>(0.813-0.906)         | 0.5<br>(0.474-0.527)           | 2.59<br>(2.21-2.91)          | 3.45<br>(3.05-3.78)  | 3.09<br>(2.7-3.42)   |
| New Zealand               | Female | 85.4<br>(84.8-85.8) | 0.593<br>(0.558-0.629)         | 0.205<br>(0.193-0.219)         | 1.5<br>(1-1.88)              | 2.1<br>(1.6-2.49)    | 1.71<br>(1.21-2.09)  |
| High-income Asia Pacific  | Male   | 84.5<br>(84.1-84.8) | 1.05<br>(0.977-1.12)           | 0.422<br>(0.39-0.457)          | 2.63<br>(2.28-2.99)          | 3.68<br>(3.28-4.06)  | 3.05<br>(2.68-3.42)  |
| High-income Asia Pacific  | Female | 89.3<br>(88.9-89.6) | 0.299<br>(0.276-0.323)         | 0.0996<br>(0.09-0.112)         | 1.53<br>(1.18-1.91)          | 1.83<br>(1.45-2.22)  | 1.63<br>(1.27-2.01)  |
| Brunei Darussalam         | Male   | 78.1<br>(76.5-79.3) | 1.26<br>(1.18-1.35)            | 0.849<br>(0.796-0.908)         | 3.13<br>(1.94-4)             | 4.39<br>(3.2-5.3)    | 3.97<br>(2.78-4.89)  |
| Brunei Darussalam         | Female | 80.6<br>(79.1-82)   | 0.637<br>(0.581-0.697)         | 0.317<br>(0.289-0.35)          | 2.31<br>(1.07-3.12)          | 2.94<br>(1.72-3.79)  | 2.62<br>(1.39-3.46)  |
| Japan                     | Male   | 84.3<br>(84-84.6)   | 0.938<br>(0.875-0.995)         | 0.291<br>(0.274-0.308)         | 2.13<br>(1.79-2.42)          | 3.06<br>(2.7-3.38)   | 2.42<br>(2.07-2.71)  |
| Japan                     | Female | 89.4<br>(89.1-89.7) | 0.253<br>(0.238-0.271)         | 0.0316<br>(0.03-0.0333)        | 1.28<br>(0.965-1.59)         | 1.54<br>(1.21-1.84)  | 1.31<br>(0.996-1.62) |
| Republic of Korea         | Male   | 84.5<br>(84.1-85)   | 1.3<br>(1.19-1.45)             | 0.701<br>(0.632-0.786)         | 4.17<br>(3.68-5.01)          | 5.48<br>(4.91-6.35)  | 4.87<br>(4.33-5.72)  |
| Republic of Korea         | Female | 89<br>(88.5-89.5)   | 0.424<br>(0.373-0.487)         | 0.265<br>(0.229-0.308)         | 3.03<br>(2.5-3.91)           | 3.46<br>(2.89-4.35)  | 3.3<br>(2.74-4.19)   |
| Singapore                 | Male   | 87<br>(86.4-87.6)   | 0.713<br>(0.677-0.758)         | 0.239<br>(0.228-0.253)         | 2.93<br>(2.3-3.47)           | 3.64<br>(3-4.2)      | 3.17<br>(2.54-3.72)  |
| Singapore                 | Female | 89.8<br>(89.1-90.4) | 0.187<br>(0.166-0.21)          | 0.0374<br>(0.0306-0.0457)      | 1.82<br>(1.18-2.38)          | 2.01<br>(1.35-2.59)  | 1.86<br>(1.21-2.43)  |
| High-income North America | Male   | 79.1<br>(78.5-79.5) | 1.04<br>(0.996-1.09)           | 0.589<br>(0.562-0.617)         | 2.91<br>(2.4-3.36)           | 3.95<br>(3.43-4.44)  | 3.5<br>(2.98-3.97)   |
| High-income North America | Female | 83<br>(82.5-83.5)   | 0.848<br>(0.813-0.88)          | 0.341<br>(0.329-0.353)         | 1.77<br>(1.19-2.25)          | 2.62<br>(2.02-3.1)   | 2.11<br>(1.53-2.58)  |
| Canada                    | Male   | 82.8<br>(82.3-83.2) | 0.885<br>(0.835-0.94)          | 0.458<br>(0.432-0.485)         | 2.27<br>(1.84-2.65)          | 3.16<br>(2.7-3.54)   | 2.73<br>(2.28-3.12)  |
| Canada                    | Female | 85.9<br>(85.4-86.3) | 0.675<br>(0.632-0.725)         | 0.22<br>(0.206-0.237)          | 1.31<br>(0.808-1.71)         | 1.98<br>(1.47-2.39)  | 1.53<br>(1.03-1.93)  |
| Greenland                 | Male   | 76<br>(74.3-77.4)   | 1.94<br>(1.74-2.15)            | 1.08<br>(0.971-1.19)           | 4.45<br>(3.57-5.08)          | 6.39<br>(5.44-7.1)   | 5.53<br>(4.62-6.2)   |
| Greenland                 | Female | 81.8<br>(80.1-82.9) | 1.82<br>(1.64-2.01)            | 0.993<br>(0.901-1.11)          | 6.45<br>(3.51-5.37)          | 6.45<br>(5.24-7.26)  | 5.63<br>(4.47-6.39)  |
| United States of America  | Male   | 78.6<br>(78-79.1)   | 1.06<br>(1.01-1.11)            | 0.604<br>(0.575-0.634)         | 2.91<br>(2.36-3.41)          | 3.98<br>(3.42-4.49)  | 3.52<br>(2.97-4.03)  |
| United States of America  | Female | 82.7<br>(82.1-83.2) | 0.868<br>(0.832-0.902)         | 0.356<br>(0.342-0.369)         | 1.77<br>(1.17-2.27)          | 2.64<br>(2.02-3.14)  | 2.13<br>(1.52-2.62)  |
| Southern Latin America    | Male   | 79.1<br>(78.5-79.7) | 1.01<br>(0.963-1.06)           | 0.524<br>(0.497-0.552)         | 3.51<br>(2.96-3.99)          | 4.52<br>(3.95-5.04)  | 4.03<br>(3.47-4.53)  |
| Southern Latin America    | Female | 83.3<br>(82.7-83.9) | 0.578<br>(0.549-0.611)         | 0.281<br>(0.264-0.299)         | 2.28<br>(1.69-2.84)          | 2.86<br>(2.28-3.41)  | 2.56<br>(1.98-3.12)  |
| Argentina                 | Male   | 77.9<br>(77.3-78.5) | 1.18<br>(1.12-1.24)            | 0.643<br>(0.611-0.674)         | 3.09<br>(2.49-3.66)          | 4.27<br>(3.65-4.85)  | 3.73<br>(3.12-4.3)   |
| Argentina                 | Female | 82.3<br>(81.6-83)   | 0.716<br>(0.684-0.755)         | 0.361<br>(0.341-0.383)         | 2.01<br>(1.36-2.65)          | 2.72<br>(2.08-3.38)  | 2.37<br>(1.73-3.02)  |
| Chile                     | Male   | 82.1<br>(81.6-82.7) | 0.503<br>(0.48-0.528)          | 0.151<br>(0.142-0.161)         | 4.16<br>(3.6-4.66)           | 4.66<br>(4.11-5.18)  | 4.31<br>(3.76-4.81)  |
| Chile                     | Female | 85.6<br>(85.1-86.1) | 0.267<br>(0.253-0.281)         | 0.0997<br>(0.0933-0.107)       | 2.68<br>(2.16-3.13)          | 2.95<br>(2.42-3.39)  | 2.78<br>(2.26-3.22)  |

Supplementary Results Table S3. Life expectancy at birth by location, sex, and scenario

| Location       | Sex    | 2050                |                                |                                | Change between 2022 and 2050 |                     |                      |
|----------------|--------|---------------------|--------------------------------|--------------------------------|------------------------------|---------------------|----------------------|
|                |        | Reference           | Difference between             |                                | Reference                    | Elimination - 2023  | Elimination - 2050   |
|                |        |                     | Elimination-2023 and Reference | Elimination-2050 and Reference |                              |                     |                      |
| Uruguay        | Male   | 76.7<br>(76.1-77.2) | 1.44<br>(1.36-1.53)            | 0.844<br>(0.8-0.892)           | 3.27<br>(2.8-3.66)           | 4.71<br>(4.21-5.11) | 4.12<br>(3.62-4.51)  |
| Uruguay        | Female | 82.7<br>(82.1-83.2) | 0.449<br>(0.426-0.472)         | 0.168<br>(0.159-0.179)         | 2.36<br>(1.84-2.79)          | 2.81<br>(2.38-3.25) | 2.53<br>(2.01-2.96)  |
| Western Europe | Male   | 82.7<br>(82.5-82.9) | 1.08<br>(1.03-1.13)            | 0.522<br>(0.5-0.546)           | 2.64<br>(2.42-2.8)           | 3.72<br>(3.48-3.89) | 3.16<br>(2.94-3.33)  |
| Western Europe | Female | 86.2<br>(85.9-86.5) | 0.497<br>(0.476-0.52)          | 0.177<br>(0.17-0.185)          | 1.63<br>(1.35-1.86)          | 2.13<br>(1.84-2.37) | 1.81<br>(1.52-2.05)  |
| Andorra        | Male   | 83.9<br>(81.1-87)   | 1.37<br>(1.2-1.54)             | 0.727<br>(0.655-0.811)         | 2.27<br>(1.8-2.66)           | 3.64<br>(3.13-4.04) | 3<br>(2.52-3.37)     |
| Andorra        | Female | 87.8<br>(85.6-90.1) | 0.364<br>(0.31-0.423)          | 0.0947<br>(0.0743-0.118)       | 1.58<br>(0.736-2.28)         | 1.95<br>(1.06-2.64) | 1.68<br>(0.823-2.37) |
| Austria        | Male   | 83.4<br>(83-83.8)   | 1.04<br>(0.982-1.11)           | 0.437<br>(0.412-0.467)         | 3.14<br>(2.7-3.49)           | 4.18<br>(3.74-4.55) | 3.58<br>(3.14-3.93)  |
| Austria        | Female | 86.9<br>(86.5-87.4) | 0.428<br>(0.4-0.462)           | 0.136<br>(0.126-0.148)         | 2.2<br>(1.76-2.61)           | 2.63<br>(2.19-3.04) | 2.34<br>(1.9-2.75)   |
| Belgium        | Male   | 82.5<br>(82.1-82.9) | 1.17<br>(1.08-1.25)            | 0.593<br>(0.551-0.637)         | 2.65<br>(2.3-2.96)           | 3.81<br>(3.45-4.13) | 3.24<br>(2.88-3.56)  |
| Belgium        | Female | 86<br>(85.5-86.4)   | 0.503<br>(0.469-0.542)         | 0.142<br>(0.133-0.155)         | 1.56<br>(1.1-1.96)           | 2.06<br>(1.6-2.46)  | 1.7<br>(1.24-2.1)    |
| Cyprus         | Male   | 82.6<br>(81.6-83.6) | 1.22<br>(1.11-1.35)            | 0.647<br>(0.589-0.717)         | 3.04<br>(2.46-3.5)           | 4.26<br>(3.63-4.75) | 3.69<br>(3.09-4.15)  |
| Cyprus         | Female | 85.7<br>(84.9-86.3) | 0.248<br>(0.222-0.275)         | 0.0586<br>(0.0521-0.0665)      | 2.22<br>(1.64-2.67)          | 2.47<br>(1.89-2.93) | 2.28<br>(1.7-2.74)   |
| Denmark        | Male   | 82.3<br>(82-82.6)   | 1.23<br>(1.15-1.32)            | 0.804<br>(0.751-0.867)         | 3.02<br>(2.71-3.38)          | 4.25<br>(3.92-4.63) | 3.83<br>(3.5-4.19)   |
| Denmark        | Female | 84.8<br>(84.4-85.2) | 1.02<br>(0.956-1.08)           | 0.49<br>(0.46-0.521)           | 1.62<br>(1.21-2.01)          | 2.63<br>(2.22-3.02) | 2.11<br>(1.7-2.5)    |
| Finland        | Male   | 82.6<br>(82.2-83.1) | 0.841<br>(0.794-0.899)         | 0.321<br>(0.304-0.342)         | 4.56<br>(3.91-5.26)          | 5.4<br>(4.74-6.12)  | 4.88<br>(4.23-5.59)  |
| Finland        | Female | 86.6<br>(86.2-87.1) | 0.325<br>(0.303-0.349)         | 0.0894<br>(0.0831-0.0964)      | 2.98<br>(2.37-3.63)          | 3.31<br>(2.7-3.97)  | 3.07<br>(2.46-3.73)  |
| France         | Male   | 82.6<br>(82.3-82.8) | 1.19<br>(1.09-1.29)            | 0.545<br>(0.498-0.592)         | 2.31<br>(2.03-2.59)          | 3.49<br>(3.22-3.77) | 2.85<br>(2.58-3.13)  |
| France         | Female | 87.3<br>(87-87.6)   | 0.465<br>(0.423-0.514)         | 0.183<br>(0.164-0.204)         | 1.43<br>(1.13-1.7)           | 1.9<br>(1.58-2.18)  | 1.62<br>(1.31-1.89)  |
| Germany        | Male   | 81.7<br>(81.5-82)   | 1.08<br>(1.02-1.14)            | 0.477<br>(0.453-0.505)         | 2.5<br>(2.2-2.78)            | 3.58<br>(3.26-3.87) | 2.98<br>(2.67-3.26)  |
| Germany        | Female | 85.2<br>(84.9-85.5) | 0.52<br>(0.49-0.553)           | 0.165<br>(0.155-0.177)         | 1.38<br>(1.07-1.65)          | 1.9<br>(1.58-2.17)  | 1.54<br>(1.23-1.82)  |
| Greece         | Male   | 81.3<br>(80.8-81.7) | 2.03<br>(1.92-2.17)            | 1.15<br>(1.09-1.22)            | 3.6<br>(3.18-4.01)           | 5.64<br>(5.18-6.1)  | 4.76<br>(4.33-5.19)  |
| Greece         | Female | 85.1<br>(84.8-85.4) | 0.667<br>(0.631-0.711)         | 0.265<br>(0.251-0.284)         | 2.19<br>(1.84-2.55)          | 2.86<br>(2.5-3.24)  | 2.46<br>(2.1-2.83)   |
| Iceland        | Male   | 84.3<br>(83.6-85.1) | 0.845<br>(0.787-0.914)         | 0.45<br>(0.42-0.485)           | 2.47<br>(2.01-2.95)          | 3.32<br>(2.84-3.79) | 2.92<br>(2.46-3.4)   |
| Iceland        | Female | 87.1<br>(86.4-87.8) | 0.534<br>(0.494-0.584)         | 0.1<br>(0.0916-0.111)          | 2.4<br>(1.89-2.83)           | 2.94<br>(2.38-3.4)  | 2.5<br>(1.98-2.94)   |
| Ireland        | Male   | 85<br>(84.6-85.4)   | 0.86<br>(0.817-0.917)          | 0.417<br>(0.394-0.447)         | 3.44<br>(3.13-3.89)          | 4.3<br>(4-4.74)     | 3.86<br>(3.55-4.3)   |
| Ireland        | Female | 87.1<br>(86.7-87.5) | 0.645<br>(0.601-0.687)         | 0.205<br>(0.19-0.219)          | 2.14<br>(1.82-2.48)          | 2.79<br>(2.46-3.13) | 2.35<br>(2.02-2.7)   |
| Israel         | Male   | 84.5<br>(83.5-85.2) | 0.802<br>(0.734-0.88)          | 0.321<br>(0.295-0.351)         | 2.78<br>(1.73-3.73)          | 3.58<br>(2.52-4.58) | 3.1<br>(2.04-4.07)   |
| Israel         | Female | 87.3<br>(86.6-87.7) | 0.287<br>(0.262-0.316)         | 0.0644<br>(0.0583-0.0716)      | 1.92<br>(1.28-2.43)          | 2.21<br>(1.54-2.73) | 1.98<br>(1.34-2.49)  |
| Italy          | Male   | 83.5<br>(83.3-83.8) | 1.01<br>(0.956-1.09)           | 0.5<br>(0.471-0.535)           | 2.76<br>(2.43-3.08)          | 3.77<br>(3.46-4.12) | 3.26<br>(2.94-3.59)  |
| Italy          | Female | 87<br>(86.6-87.2)   | 0.409<br>(0.383-0.438)         | 0.108<br>(0.1-0.117)           | 1.87<br>(1.5-2.2)            | 2.28<br>(1.91-2.62) | 1.98<br>(1.61-2.31)  |
| Luxembourg     | Male   | 83.1<br>(82.2-83.8) | 1.14<br>(1.06-1.22)            | 0.584<br>(0.545-0.626)         | 2.05<br>(1.64-2.4)           | 3.19<br>(2.76-3.51) | 2.64<br>(2.21-2.95)  |
| Luxembourg     | Female | 86.5<br>(85.7-87.2) | 0.507<br>(0.471-0.546)         | 0.126<br>(0.115-0.137)         | 1.22<br>(0.622-1.62)         | 1.73<br>(1.09-2.13) | 1.35<br>(0.74-1.75)  |
| Malta          | Male   | 84.5<br>(83.7-85.4) | 0.98<br>(0.907-1.06)           | 0.391<br>(0.362-0.425)         | 3.81<br>(3.09-4.46)          | 4.79<br>(4.04-5.45) | 4.2<br>(3.47-4.85)   |
| Malta          | Female | 86.8<br>(85.9-87.6) | 0.377<br>(0.349-0.415)         | 0.0944<br>(0.0867-0.103)       | 2.87<br>(2.21-3.45)          | 3.25<br>(2.57-3.84) | 2.97<br>(2.3-3.55)   |
| Monaco         | Male   | 80<br>(78.6-81.1)   | 1.6<br>(1.41-1.82)             | 0.96<br>(0.843-1.09)           | 2.3<br>(1.96-2.65)           | 3.9<br>(3.53-4.29)  | 3.26<br>(2.92-3.64)  |
| Monaco         | Female | 83.5<br>(81.9-85.2) | 0.829<br>(0.707-0.957)         | 0.293<br>(0.243-0.347)         | 1.22<br>(0.823-1.56)         | 2.04<br>(1.66-2.38) | 1.51<br>(1.13-1.86)  |
| Netherlands    | Male   | 82.7<br>(82.4-82.9) | 0.99<br>(0.932-1.05)           | 0.571<br>(0.539-0.607)         | 1.94<br>(1.73-2.13)          | 2.93<br>(2.71-3.12) | 2.51<br>(2.29-2.7)   |
| Netherlands    | Female | 84.7<br>(84.4-85)   | 0.68<br>(0.636-0.729)          | 0.289<br>(0.27-0.31)           | 0.872<br>(0.593-1.1)         | 1.55<br>(1.27-1.78) | 1.16<br>(0.876-1.39) |
| Norway         | Male   | 83.8<br>(83.5-84)   | 0.346<br>(0.327-0.368)         | 0.0837<br>(0.0786-0.0894)      | 2.38<br>(2.08-3.22)          | 2.72<br>(2.43-3.58) | 2.46<br>(2.16-3.31)  |
| Norway         | Female | 85.9<br>(85.6-86.2) | 0.183<br>(0.173-0.194)         | 0.027<br>(0.025-0.0291)        | 1.33<br>(1.01-2.06)          | 1.51<br>(1.19-2.24) | 1.36<br>(1.04-2.08)  |
| Portugal       | Male   | 82.6<br>(82.3-82.9) | 0.976<br>(0.92-1.04)           | 0.378<br>(0.355-0.401)         | 3.44<br>(3.09-3.83)          | 4.42<br>(4.04-4.81) | 3.82<br>(3.46-4.22)  |
| Portugal       | Female | 87.5<br>(87-87.9)   | 0.212<br>(0.199-0.228)         | 0.0848<br>(0.0795-0.0907)      | 2.69<br>(2.21-3.08)          | 2.91<br>(2.42-3.31) | 2.78<br>(2.3-3.17)   |
| San Marino     | Male   | 87.9<br>(85-90.7)   | 1.09<br>(0.887-1.3)            | 0.608<br>(0.51-0.714)          | 3.14<br>(2.55-3.79)          | 4.23<br>(3.56-4.9)  | 3.75<br>(3.12-4.39)  |
| San Marino     | Female | 90.1<br>(87.1-93.2) | 0.309<br>(0.243-0.381)         | 0.0653<br>(0.0474-0.085)       | 1.89<br>(1.15-2.57)          | 2.2<br>(1.47-2.87)  | 1.96<br>(1.22-2.63)  |
| Spain          | Male   | 83.5<br>(83.2-83.7) | 1.15<br>(1.09-1.22)            | 0.492<br>(0.465-0.521)         | 2.98<br>(2.68-3.25)          | 4.13<br>(3.79-4.41) | 3.48<br>(3.16-3.75)  |
| Spain          | Female | 87.7<br>(87.3-88.1) | 0.215<br>(0.198-0.236)         | 0.0698<br>(0.0642-0.0767)      | 1.77<br>(1.37-2.19)          | 1.99<br>(1.58-2.41) | 1.84<br>(1.44-2.26)  |
| Sweden         | Male   | 84.5<br>(83.4-85.6) | 0.777<br>(0.72-0.854)          | 0.475<br>(0.439-0.518)         | 2.24<br>(1.93-2.53)          | 3.01<br>(2.71-3.32) | 2.71<br>(2.4-3.01)   |
| Sweden         | Female | 86.5<br>(85.6-87.4) | 0.673<br>(0.618-0.724)         | 0.299<br>(0.274-0.325)         | 1.37<br>(0.997-1.71)         | 2.04<br>(1.64-2.4)  | 1.66<br>(1.28-2.02)  |
| Switzerland    | Male   | 85.3<br>(84.9-85.6) | 0.961<br>(0.9-1.04)            | 0.51<br>(0.476-0.553)          | 2.13<br>(1.84-2.43)          | 3.09<br>(2.78-3.39) | 2.64<br>(2.34-2.94)  |
| Switzerland    | Female | 87.8<br>(87.5-88.1) | 0.551<br>(0.515-0.589)         | 0.174<br>(0.162-0.189)         | 1.12<br>(0.822-1.37)         | 1.67<br>(1.35-1.93) | 1.3<br>(0.983-1.55)  |

Supplementary Results Table S3. Life expectancy at birth by location, sex, and scenario

| Location                         | Sex    | 2050                |                                |                                | Change between 2022 and 2050 |                      |                      |
|----------------------------------|--------|---------------------|--------------------------------|--------------------------------|------------------------------|----------------------|----------------------|
|                                  |        | Reference           | Difference between             |                                | Reference                    | Elimination - 2023   |                      |
|                                  |        |                     | Elimination-2023 and Reference | Elimination-2050 and Reference |                              | Elimination - 2050   |                      |
| United Kingdom                   | Male   | 82.2<br>(81.9-82.5) | 1.08<br>(1.03-1.13)            | 0.604<br>(0.577-0.632)         | 2.3<br>(1.98-2.56)           | 3.8<br>(3.06-3.64)   | 2.9<br>(2.59-3.16)   |
| United Kingdom                   | Female | 84.9<br>(84.6-85.3) | 0.771<br>(0.731-0.812)         | 0.304<br>(0.289-0.319)         | 1.47<br>(1.12-1.78)          | 2.24<br>(1.89-2.56)  | 1.78<br>(1.42-2.09)  |
| Latin America and Caribbean      | Male   | 77.2<br>(74.8-78.8) | 0.757<br>(0.724-0.792)         | 0.441<br>(0.421-0.46)          | 4.64<br>(2.41-6.14)          | 5.39<br>(3.14-6.91)  | 5.08<br>(2.84-6.59)  |
| Latin America and Caribbean      | Female | 82.4<br>(79.8-84.5) | 0.312<br>(0.296-0.331)         | 0.116<br>(0.108-0.129)         | 3.7<br>(1.22-5.68)           | 4.01<br>(1.54-5.99)  | 3.81<br>(1.35-5.79)  |
| Andean Latin America             | Male   | 79.6<br>(77.1-81.9) | 0.505<br>(0.468-0.545)         | 0.283<br>(0.262-0.306)         | 5.63<br>(3.91-7.13)          | 6.14<br>(4.4-7.66)   | 5.92<br>(4.19-7.42)  |
| Andean Latin America             | Female | 82.6<br>(80.2-84.7) | 0.136<br>(0.123-0.149)         | 0.0451<br>(0.0399-0.0507)      | 4.56<br>(2.75-6)             | 4.69<br>(2.88-6.14)  | 4.6<br>(2.79-6.05)   |
| Bolivia (Plurinational State of) | Male   | 76.1<br>(72.7-79.1) | 0.788<br>(0.697-0.898)         | 0.514<br>(0.454-0.587)         | 9.02<br>(6.16-12)            | 9.8<br>(6.92-12.8)   | 9.53<br>(6.66-12.5)  |
| Bolivia (Plurinational State of) | Female | 77.4<br>(74.1-80.3) | 0.182<br>(0.159-0.207)         | 0.101<br>(0.0851-0.118)        | 6.93<br>(4.43-9.34)          | 7.11<br>(4.59-9.53)  | 7.03<br>(4.52-9.44)  |
| Ecuador                          | Male   | 78.6<br>(75.9-81.2) | 0.512<br>(0.46-0.571)          | 0.262<br>(0.234-0.294)         | 3.82<br>(1.96-5.24)          | 4.33<br>(2.45-5.75)  | 4.08<br>(2.22-5.49)  |
| Ecuador                          | Female | 82.6<br>(80.3-84.8) | 0.165<br>(0.147-0.183)         | 0.0495<br>(0.0434-0.0561)      | 2.99<br>(1.34-4.19)          | 3.15<br>(1.5-3.6)    | 3.04<br>(1.39-4.24)  |
| Peru                             | Male   | 81.3<br>(78.4-84.1) | 0.397<br>(0.356-0.445)         | 0.203<br>(0.183-0.225)         | 5.08<br>(3.45-6.4)           | 5.48<br>(3.82-6.82)  | 5.29<br>(3.65-6.61)  |
| Peru                             | Female | 84.4<br>(81.8-86.9) | 0.1<br>(0.0895-0.113)          | 0.0194<br>(0.0173-0.0217)      | 4.19<br>(2.45-5.59)          | 4.29<br>(2.55-5.69)  | 4.21<br>(2.47-5.61)  |
| Caribbean                        | Male   | 74.5<br>(59.9-77.5) | 1.03<br>(0.667-1.11)           | 0.62<br>(0.405-0.666)          | 4.72<br>(-11.4-18.7)         | 5.76<br>(-10.8-19.8) | 5.34<br>(-11-19.3)   |
| Caribbean                        | Female | 78.8<br>(68.2-82.1) | 0.457<br>(0.341-0.493)         | 0.208<br>(0.155-0.228)         | 4.13<br>(-7.52-14.7)         | 4.58<br>(-7.18-15.1) | 4.34<br>(-7.37-14.9) |
| Antigua and Barbuda              | Male   | 77.8<br>(76.3-78.9) | 0.681<br>(0.626-0.739)         | 0.416<br>(0.383-0.451)         | 3.26<br>(1.63-4.29)          | 3.94<br>(2.31-5.02)  | 3.68<br>(2.05-4.73)  |
| Antigua and Barbuda              | Female | 80.2<br>(78.6-81.4) | 0.283<br>(0.267-0.301)         | 0.111<br>(0.104-0.119)         | 2.22<br>(0.541-3.34)         | 2.5<br>(0.807-3.63)  | 2.33<br>(0.647-3.45) |
| Bahamas                          | Male   | 74.3<br>(71.2-77.1) | 0.789<br>(0.734-0.842)         | 0.518<br>(0.481-0.553)         | 3.82<br>(2.46-5.29)          | 4.61<br>(3.24-6.11)  | 4.34<br>(2.98-5.83)  |
| Bahamas                          | Female | 80.1<br>(77.4-82.6) | 0.222<br>(0.208-0.237)         | 0.102<br>(0.0955-0.109)        | 3.04<br>(1.43-4.28)          | 3.26<br>(1.65-4.51)  | 3.14<br>(1.53-4.39)  |
| Barbados                         | Male   | 78.5<br>(75.7-81.2) | 0.575<br>(0.523-0.626)         | 0.291<br>(0.263-0.318)         | 4.61<br>(2.79-5.96)          | 4.9<br>(3.31-6.55)   | 4.9<br>(3.05-6.26)   |
| Barbados                         | Female | 80<br>(77.3-82.2)   | 0.0857<br>(0.0749-0.0986)      | 0.0154<br>(0.0136-0.0182)      | 2.73<br>(0.966-3.96)         | 2.82<br>(1.06-4.05)  | 2.75<br>(0.984-3.98) |
| Belize                           | Male   | 76.2<br>(73.4-78.6) | 1.09<br>(1.03-1.16)            | 0.702<br>(0.663-0.744)         | 4.3<br>(1.3-7.43)            | 5.39<br>(2.35-8.54)  | 5.01<br>(1.98-8.15)  |
| Belize                           | Female | 81.5<br>(78.5-84.1) | 0.274<br>(0.26-0.29)           | 0.118<br>(0.11-0.129)          | 4.51<br>(1.26-7.3)           | 4.78<br>(1.53-7.57)  | 4.63<br>(1.38-7.42)  |
| Bermuda                          | Male   | 81.4<br>(79.6-82.7) | 0.979<br>(0.888-1.09)          | 0.587<br>(0.533-0.649)         | 3.84<br>(3.1-4.52)           | 4.82<br>(4.06-5.54)  | 4.42<br>(3.69-5.13)  |
| Bermuda                          | Female | 88.4<br>(86.4-89.8) | 0.388<br>(0.341-0.441)         | 0.156<br>(0.137-0.178)         | 3.35<br>(2.46-4.09)          | 3.74<br>(2.82-4.49)  | 3.51<br>(2.61-4.25)  |
| Cuba                             | Male   | 78.5<br>(76.7-80.2) | 1.57<br>(1.45-1.7)             | 0.884<br>(0.813-0.955)         | 2.35<br>(1.29-3.05)          | 3.92<br>(2.79-4.64)  | 3.23<br>(2.15-3.93)  |
| Cuba                             | Female | 83.7<br>(81.9-85.1) | 0.625<br>(0.573-0.677)         | 0.205<br>(0.185-0.227)         | 2.54<br>(1.27-3.45)          | 3.16<br>(1.87-4.09)  | 2.74<br>(1.47-3.66)  |
| Dominica                         | Male   | 73.1<br>(70.3-75.4) | 0.77<br>(0.698-0.852)          | 0.458<br>(0.416-0.505)         | 4.55<br>(2.55-6.18)          | 5.32<br>(3.25-7.01)  | 5<br>(2.97-6.68)     |
| Dominica                         | Female | 77.7<br>(74.8-79.9) | 0.218<br>(0.199-0.241)         | 0.0526<br>(0.0476-0.0578)      | 3.84<br>(1.65-5.58)          | 4.06<br>(1.85-5.82)  | 3.89<br>(1.7-5.63)   |
| Dominican Republic               | Male   | 76.9<br>(73.3-79.8) | 1.21<br>(1.11-1.33)            | 0.909<br>(0.837-0.996)         | 4.37<br>(1.9-5.99)           | 5.58<br>(3.07-7.24)  | 5.28<br>(2.77-6.93)  |
| Dominican Republic               | Female | 82.5<br>(79.1-85.2) | 0.804<br>(0.725-0.893)         | 0.53<br>(0.474-0.596)          | 3.83<br>(1.38-5.62)          | 4.63<br>(2.13-6.52)  | 4.36<br>(1.86-6.22)  |
| Grenada                          | Male   | 73.9<br>(71.5-75.7) | 0.658<br>(0.617-0.704)         | 0.361<br>(0.333-0.394)         | 3.58<br>(1.74-4.77)          | 4.23<br>(2.4-5.43)   | 3.94<br>(2.11-5.13)  |
| Grenada                          | Female | 78.5<br>(76-80.5)   | 0.227<br>(0.215-0.241)         | 0.0799<br>(0.0747-0.0868)      | 3.35<br>(1.25-4.76)          | 3.58<br>(1.48-4.99)  | 3.43<br>(1.33-4.84)  |
| Guyana                           | Male   | 70.9<br>(66.8-75)   | 0.825<br>(0.748-0.901)         | 0.458<br>(0.406-0.517)         | 6.86<br>(4.35-10.2)          | 7.69<br>(5.24-11)    | 7.32<br>(4.86-10.6)  |
| Guyana                           | Female | 77.8<br>(74.3-81)   | 0.225<br>(0.203-0.247)         | 0.107<br>(0.0947-0.12)         | 6.9<br>(4.43-10)             | 7.13<br>(4.66-10.2)  | 7.01<br>(4.54-10.1)  |
| Haiti                            | Male   | 69.5<br>(40.8-74.9) | 0.49<br>(0.134-0.577)          | 0.272<br>(0.077-0.329)         | 7.71<br>(-21.4-36)           | 8.2<br>(-21.3-36.5)  | 7.98<br>(-21.3-36.2) |
| Haiti                            | Female | 71<br>(50.1-76.8)   | 0.2<br>(0.0892-0.24)           | 0.105<br>(0.0473-0.126)        | 7.69<br>(-13.6-29.2)         | 7.89<br>(-13.5-29.5) | 7.8<br>(-13.6-29.4)  |
| Jamaica                          | Male   | 78<br>(74.8-81.4)   | 0.94<br>(0.861-1.03)           | 0.469<br>(0.429-0.511)         | 4.14<br>(2.58-5.73)          | 5.08<br>(3.49-6.68)  | 4.61<br>(3.05-6.21)  |
| Jamaica                          | Female | 81.4<br>(78-84.7)   | 0.323<br>(0.298-0.35)          | 0.0777<br>(0.0702-0.0862)      | 3.85<br>(1.45-5.57)          | 4.17<br>(1.76-5.89)  | 3.93<br>(1.53-5.65)  |
| Puerto Rico                      | Male   | 81.4<br>(78.9-83.7) | 0.885<br>(0.81-0.959)          | 0.484<br>(0.444-0.521)         | 4.61<br>(3.33-5.73)          | 5.49<br>(4.17-6.65)  | 5.09<br>(3.79-6.23)  |
| Puerto Rico                      | Female | 87.4<br>(85.4-89.3) | 0.39<br>(0.362-0.419)          | 0.0884<br>(0.0812-0.0968)      | 3.03<br>(1.55-4.33)          | 3.42<br>(1.92-4.74)  | 3.11<br>(1.64-4.42)  |
| Saint Kitts and Nevis            | Male   | 74.8<br>(72.7-76.7) | 0.464<br>(0.429-0.51)          | 0.232<br>(0.216-0.253)         | 4.96<br>(3.32-6.3)           | 5.42<br>(3.79-6.78)  | 5.19<br>(3.55-6.54)  |
| Saint Kitts and Nevis            | Female | 80.5<br>(78.1-82.7) | 0.172<br>(0.158-0.187)         | 0.0711<br>(0.0649-0.0781)      | 4.02<br>(2.04-5.59)          | 4.19<br>(2.2-5.77)   | 4.09<br>(2.11-5.66)  |
| Saint Lucia                      | Male   | 76.4<br>(73.5-78.9) | 0.708<br>(0.647-0.771)         | 0.351<br>(0.32-0.383)          | 4.73<br>(2.47-6.78)          | 5.44<br>(3.2-7.45)   | 5.08<br>(2.83-7.11)  |
| Saint Lucia                      | Female | 82.5<br>(79.6-85)   | 0.214<br>(0.196-0.233)         | 0.0718<br>(0.0657-0.0785)      | 4.52<br>(2.12-6.44)          | 4.73<br>(2.33-6.67)  | 4.59<br>(2.19-6.52)  |
| Saint Vincent and the Grenadines | Male   | 74<br>(72-75.7)     | 0.687<br>(0.633-0.741)         | 0.383<br>(0.345-0.423)         | 3.88<br>(2.18-5.14)          | 4.56<br>(2.9-5.81)   | 4.26<br>(2.59-5.5)   |
| Saint Vincent and the Grenadines | Female | 79.3<br>(76.9-81.3) | 0.192<br>(0.181-0.206)         | 0.0842<br>(0.0795-0.09)        | 3.93<br>(1.69-5.4)           | 4.12<br>(1.89-5.59)  | 4.01<br>(1.78-5.48)  |
| Suriname                         | Male   | 75.5<br>(70.9-79.8) | 1.1<br>(1.03-1.18)             | 0.525<br>(0.479-0.58)          | 5.44<br>(2.33-7.96)          | 6.54<br>(3.39-9.11)  | 5.96<br>(2.85-8.5)   |
| Suriname                         | Female | 80.9<br>(76.8-84.2) | 0.373<br>(0.347-0.405)         | 0.102<br>(0.091-0.117)         | 4.82<br>(1.79-7.32)          | 5.2<br>(2.15-7.68)   | 4.92<br>(1.89-7.41)  |
| Trinidad and Tobago              | Male   | 76<br>(72.5-79.5)   | 0.951<br>(0.856-1.04)          | 0.519<br>(0.453-0.586)         | 6.62<br>(4.67-8.82)          | 7.57<br>(5.67-9.75)  | 7.14<br>(5.24-9.32)  |
| Trinidad and Tobago              | Female | 82.8<br>(79.7-85.9) | 0.277<br>(0.253-0.304)         | 0.0721<br>(0.0632-0.0816)      | 6.48<br>(4.37-8.76)          | 6.76<br>(4.66-9.05)  | 6.55<br>(4.45-8.83)  |

Supplementary Results Table S3. Life expectancy at birth by location, sex, and scenario

| Location                           | Sex    | 2050                |                                |                                | Change between 2022 and 2050 |                        |                       |
|------------------------------------|--------|---------------------|--------------------------------|--------------------------------|------------------------------|------------------------|-----------------------|
|                                    |        | Reference           | Difference between             |                                | Reference                    | Elimination - 2023     |                       |
|                                    |        |                     | Elimination-2023 and Reference | Elimination-2050 and Reference |                              | Elimination - 2050     |                       |
| United States Virgin Islands       | Male   | 77.2<br>(74.6-79.6) | 0.615<br>(0.553-0.698)         | 0.395<br>(0.355-0.446)         | 6.3<br>(4.45-9.14)           | 6.92<br>(5.05-9.78)    | 6.7<br>(4.84-9.55)    |
| United States Virgin Islands       | Female | 86<br>(84-87.8)     | 0.278<br>(0.243-0.317)         | 0.0819<br>(0.0701-0.0959)      | 4.59<br>(2.62-7.29)          | 4.87<br>(2.88-7.58)    | 4.67<br>(2.7-7.38)    |
| Central Latin America              | Male   | 76.8<br>(73.7-79.1) | 0.613<br>(0.585-0.642)         | 0.3<br>(0.283-0.321)           | 4.7<br>(2.03-6.24)           | 5.32<br>(2.63-6.86)    | 5<br>(2.34-6.54)      |
| Central Latin America              | Female | 82.1<br>(78.9-84.8) | 0.214<br>(0.198-0.238)         | 0.0459<br>(0.0388-0.0608)      | 3.55<br>(0.609-5.71)         | 3.76<br>(0.844-5.9)    | 3.59<br>(0.667-5.75)  |
| Colombia                           | Male   | 82.1<br>(79.5-84.2) | 0.497<br>(0.457-0.543)         | 0.145<br>(0.134-0.158)         | 5.33<br>(3.78-6.4)           | 5.83<br>(4.24-6.92)    | 5.48<br>(3.92-6.55)   |
| Colombia                           | Female | 86.8<br>(84.2-89)   | 0.193<br>(0.177-0.211)         | 0.0354<br>(0.0309-0.0406)      | 3.85<br>(1.71-5.33)          | 4.05<br>(1.9-5.53)     | 3.89<br>(1.74-5.37)   |
| Costa Rica                         | Male   | 80.4<br>(78.5-82)   | 0.738<br>(0.681-0.795)         | 0.418<br>(0.386-0.451)         | 3.8<br>(2.36-4.78)           | 4.54<br>(3.05-5.52)    | 4.22<br>(2.75-5.19)   |
| Costa Rica                         | Female | 86.2<br>(84.5-87.7) | 0.251<br>(0.238-0.265)         | 0.0403<br>(0.0382-0.0427)      | 3.26<br>(1.65-4.42)          | 3.51<br>(1.9-4.67)     | 3.3<br>(1.69-4.46)    |
| El Salvador                        | Male   | 75.3<br>(72.1-78.3) | 0.635<br>(0.574-0.701)         | 0.338<br>(0.298-0.385)         | 5.15<br>(3.07-6.72)          | 5.79<br>(3.72-7.33)    | 5.49<br>(3.43-7.03)   |
| El Salvador                        | Female | 82.5<br>(79.4-85.6) | 0.241<br>(0.216-0.265)         | 0.104<br>(0.09-0.118)          | 3.52<br>(0.991-5.66)         | 3.76<br>(1.22-5.92)    | 3.62<br>(1.09-5.77)   |
| Guatemala                          | Male   | 76.7<br>(74-79)     | 0.55<br>(0.512-0.595)          | 0.309<br>(0.286-0.336)         | 5.77<br>(3.66-7.28)          | 6.32<br>(4.22-7.86)    | 6.08<br>(3.98-7.6)    |
| Guatemala                          | Female | 81.4<br>(78.7-83.8) | 0.182<br>(0.17-0.195)          | 0.0691<br>(0.0637-0.0751)      | 5.45<br>(2.88-7.55)          | 5.63<br>(3.06-7.74)    | 5.2<br>(2.95-7.62)    |
| Honduras                           | Male   | 74.9<br>(70.5-77.1) | 0.975<br>(0.826-1.12)          | 0.636<br>(0.541-0.729)         | 6<br>(0.328-9.96)            | 6<br>(1.15-11)         | 5.66<br>(0.862-10.6)  |
| Honduras                           | Female | 77.2<br>(73.5-79.9) | 0.327<br>(0.278-0.383)         | 0.119<br>(0.0982-0.144)        | 4.39<br>(0.809-7.54)         | 4.72<br>(1.11-7.86)    | 4.51<br>(0.916-7.66)  |
| Mexico                             | Male   | 75.8<br>(73.2-78.3) | 0.582<br>(0.54-0.626)          | 0.277<br>(0.258-0.296)         | 4.56<br>(2.63-5.93)          | 5.14<br>(3.21-6.56)    | 4.83<br>(2.92-6.23)   |
| Mexico                             | Female | 81.2<br>(78.8-83.5) | 0.186<br>(0.173-0.199)         | 0.0244<br>(0.0218-0.0266)      | 3.6<br>(1.61-5.27)           | 3.79<br>(1.78-5.47)    | 3.63<br>(1.63-5.3)    |
| Nicaragua                          | Male   | 79.7<br>(75.9-82.6) | 0.716<br>(0.598-0.801)         | 0.464<br>(0.387-0.527)         | 2.62<br>(-0.74-5.16)         | 3.34<br>(-0.0674-5.95) | 3.09<br>(-0.333-5.68) |
| Nicaragua                          | Female | 84<br>(81.1-86.5)   | 0.116<br>(0.1-0.136)           | 0.0305<br>(0.0258-0.0369)      | 2<br>(-0.609-4.26)           | 2.11<br>(-0.479-4.37)  | 2.03<br>(-0.573-4.29) |
| Panama                             | Male   | 81.5<br>(78.9-84.1) | 0.537<br>(0.487-0.59)          | 0.208<br>(0.191-0.228)         | 4.61<br>(3.12-5.77)          | 5.15<br>(3.61-6.33)    | 4.82<br>(3.31-5.99)   |
| Panama                             | Female | 85.8<br>(83.4-88.3) | 0.272<br>(0.254-0.291)         | 0.0985<br>(0.0921-0.106)       | 3.49<br>(1.75-4.94)          | 3.76<br>(2.01-5.22)    | 3.58<br>(1.85-5.04)   |
| Venezuela (Bolivarian Republic of) | Male   | 70.3<br>(58.4-77.5) | 0.874<br>(0.78-1.03)           | 0.497<br>(0.429-0.634)         | 2.52<br>(-7.89-8.01)         | 3.4<br>(-6.87-8.86)    | 3.02<br>(-7.27-8.47)  |
| Venezuela (Bolivarian Republic of) | Female | 78.1<br>(65.5-85.9) | 0.366<br>(0.27-0.562)          | 0.119<br>(0.0719-0.225)        | 1.46<br>(-9.22-8.31)         | 1.83<br>(-8.7-8.63)    | 1.58<br>(-9.02-8.4)   |
| Tropical Latin America             | Male   | 77.5<br>(75.6-78.6) | 0.915<br>(0.866-0.961)         | 0.59<br>(0.559-0.62)           | 4.18<br>(2.27-5.09)          | 5.1<br>(3.16-6.01)     | 4.77<br>(2.85-5.69)   |
| Tropical Latin America             | Female | 83.3<br>(81.2-84.8) | 0.437<br>(0.417-0.459)         | 0.194<br>(0.184-0.21)          | 3.49<br>(1.41-4.9)           | 3.92<br>(1.86-5.34)    | 3.68<br>(1.62-5.09)   |
| Brazil                             | Male   | 77.5<br>(75.6-78.6) | 0.906<br>(0.858-0.951)         | 0.583<br>(0.552-0.613)         | 4.2<br>(2.31-5.1)            | 5.1<br>(3.19-6.02)     | 4.78<br>(2.88-5.7)    |
| Brazil                             | Female | 83.3<br>(81.2-84.8) | 0.433<br>(0.413-0.456)         | 0.191<br>(0.18-0.208)          | 3.48<br>(1.42-4.91)          | 3.91<br>(1.86-5.34)    | 3.67<br>(1.62-5.09)   |
| Paraguay                           | Male   | 76<br>(72.3-79.1)   | 1.21<br>(1.09-1.34)            | 0.807<br>(0.727-0.893)         | 3.62<br>(1.31-5.02)          | 4.83<br>(2.4-6.27)     | 4.42<br>(2.03-5.85)   |
| Paraguay                           | Female | 82.3<br>(78.9-85.3) | 0.637<br>(0.577-0.697)         | 0.341<br>(0.306-0.374)         | 3.82<br>(1.37-5.48)          | 4.45<br>(1.96-6.11)    | 4.16<br>(1.68-5.82)   |
| North Africa and Middle East       | Male   | 77.2<br>(74.3-79.5) | 1.71<br>(1.62-1.8)             | 1.13<br>(1.06-1.2)             | 5.03<br>(2.31-7.1)           | 6.74<br>(4.03-8.89)    | 6.16<br>(3.44-8.28)   |
| North Africa and Middle East       | Female | 79.7<br>(76.8-82)   | 0.206<br>(0.186-0.234)         | 0.0756<br>(0.0679-0.0879)      | 4.19<br>(1.4-6.34)           | 4.4<br>(1.63-6.54)     | 4.27<br>(1.49-6.41)   |
| North Africa and Middle East       | Male   | 77.2<br>(74.3-79.5) | 1.71<br>(1.62-1.8)             | 1.13<br>(1.06-1.2)             | 5.03<br>(2.31-7.1)           | 6.74<br>(4.03-8.89)    | 6.16<br>(3.44-8.28)   |
| North Africa and Middle East       | Female | 79.7<br>(76.8-82)   | 0.206<br>(0.186-0.234)         | 0.0756<br>(0.0679-0.0879)      | 4.19<br>(1.4-6.34)           | 4.4<br>(1.63-6.54)     | 4.27<br>(1.49-6.41)   |
| Afghanistan                        | Male   | 72.5<br>(68.2-76.7) | 1.4<br>(1.2-1.58)              | 1<br>(0.87-1.12)               | 9.78<br>(5.73-13.5)          | 11.2<br>(7.15-14.9)    | 10.8<br>(6.73-14.5)   |
| Afghanistan                        | Female | 72<br>(67.5-76.3)   | 0.242<br>(0.196-0.306)         | 0.0957<br>(0.0748-0.125)       | 8.82<br>(4.63-12.6)          | 9.07<br>(4.88-12.8)    | 8.92<br>(4.73-12.7)   |
| Algeria                            | Male   | 81.4<br>(78.6-83.8) | 1.44<br>(1.26-1.62)            | 1.08<br>(0.948-1.23)           | 4.5<br>(2-6.48)              | 5.94<br>(3.35-7.97)    | 5.58<br>(2.99-7.63)   |
| Algeria                            | Female | 81.6<br>(79.3-83.5) | 0.0908<br>(0.0779-0.105)       | 0.034<br>(0.0281-0.04)         | 3.79<br>(1.68-5.59)          | 3.89<br>(1.78-5.68)    | 3.83<br>(1.72-5.63)   |
| Bahrain                            | Male   | 78.9<br>(76.9-80.5) | 1.55<br>(1.36-1.79)            | 1.17<br>(1.02-1.37)            | 3.54<br>(1.92-4.83)          | 5.09<br>(3.3-6.58)     | 4.72<br>(2.96-6.16)   |
| Bahrain                            | Female | 80.1<br>(77.9-81.9) | 0.334<br>(0.302-0.374)         | 0.122<br>(0.109-0.14)          | 3.24<br>(1.29-4.62)          | 3.57<br>(1.61-4.97)    | 3.36<br>(1.4-4.75)    |
| Egypt                              | Male   | 73.8<br>(70.2-76.9) | 2.9<br>(2.71-3.06)             | 2.1<br>(1.96-2.23)             | 4.06<br>(1.01-6.41)          | 6.96<br>(3.89-9.35)    | 6.16<br>(3.1-8.52)    |
| Egypt                              | Female | 75.5<br>(73-77.7)   | 0.066<br>(0.0584-0.0732)       | 0.031<br>(0.0275-0.0323)       | 4.12<br>(1.79-5.85)          | 4.18<br>(1.86-5.91)    | 4.15<br>(1.82-5.88)   |
| Iran (Islamic Republic of)         | Male   | 82.1<br>(79.1-84.1) | 1.41<br>(1.31-1.51)            | 0.863<br>(0.802-0.921)         | 4.72<br>(1.82-6.86)          | 6.13<br>(3.19-8.35)    | 5.59<br>(2.66-7.77)   |
| Iran (Islamic Republic of)         | Female | 84.5<br>(82-86.4)   | 0.19<br>(0.175-0.21)           | 0.0596<br>(0.0544-0.067)       | 4.07<br>(1.59-5.94)          | 4.26<br>(1.8-6.12)     | 4.13<br>(1.66-6)      |
| Iraq                               | Male   | 74.9<br>(70.8-78.9) | 1.86<br>(1.59-2.13)            | 1.35<br>(1.14-1.56)            | 5.87<br>(1.56-9.67)          | 7.72<br>(3.15-11.6)    | 7.22<br>(2.7-11.1)    |
| Iraq                               | Female | 80.7<br>(76.7-84)   | 0.34<br>(0.286-0.393)          | 0.207<br>(0.17-0.243)          | 5.96<br>(2.24-8.95)          | 6.3<br>(2.58-9.27)     | 6.17<br>(2.45-9.14)   |
| Jordan                             | Male   | 84.3<br>(81.3-86.6) | 2.17<br>(1.95-2.45)            | 1.47<br>(1.31-1.65)            | 5.4<br>(3.29-7.24)           | 7.58<br>(5.3-9.5)      | 6.87<br>(4.67-8.77)   |
| Jordan                             | Female | 84.9<br>(82.3-87)   | 0.393<br>(0.353-0.435)         | 0.189<br>(0.164-0.221)         | 4.92<br>(3.01-6.57)          | 5.31<br>(3.4-6.97)     | 5.11<br>(3.19-6.78)   |
| Kuwait                             | Male   | 82.8<br>(80.3-84.9) | 1.25<br>(1.13-1.38)            | 0.711<br>(0.645-0.793)         | 2.61<br>(0.599-4.1)          | 3.86<br>(1.77-5.4)     | 3.32<br>(1.26-4.84)   |
| Kuwait                             | Female | 89.4<br>(87.1-91.1) | 0.167<br>(0.145-0.194)         | 0.0528<br>(0.0391-0.0673)      | 2.4<br>(0.571-3.81)          | 2.57<br>(0.736-3.99)   | 2.45<br>(0.619-3.87)  |
| Lebanon                            | Male   | 79.9<br>(77.6-81.8) | 2.39<br>(2.16-2.68)            | 1.68<br>(1.52-1.88)            | 4.2<br>(2.19-6.23)           | 6<br>(4.44-8.64)       | 5.89<br>(3.77-7.93)   |
| Lebanon                            | Female | 84.5<br>(82.2-86.4) | 1.2<br>(1.08-1.35)             | 0.682<br>(0.612-0.772)         | 3.55<br>(1.47-5.39)          | 4.75<br>(2.68-6.64)    | 4.23<br>(2.14-6.12)   |

Supplementary Results Table S3. Life expectancy at birth by location, sex, and scenario

| Location                               | Sex    | 2050                |                                |                                | Change between 2022 and 2050 |                        |                        |
|----------------------------------------|--------|---------------------|--------------------------------|--------------------------------|------------------------------|------------------------|------------------------|
|                                        |        | Reference           | Difference between             |                                | Reference                    | Elimination - 2023     | Elimination - 2050     |
|                                        |        |                     | Elimination-2023 and Reference | Elimination-2050 and Reference |                              |                        |                        |
| Libya                                  | Male   | 74.1<br>(69.8–77.9) | 2.3<br>(2.01–2.63)             | 1.52<br>(1.33–1.72)            | 4.36<br>(0.365–7.98)         | 6.66<br>(2.48–10.4)    | 5.88<br>(1.78–9.56)    |
|                                        | Female | 77.8<br>(73.5–81.6) | 0.0653<br>(0.0564–0.0745)      | 0.0164<br>(0.0144–0.0184)      | 3.83<br>(0.352–6.62)         | 3.89<br>(0.419–6.68)   | 3.84<br>(0.368–6.64)   |
| Morocco                                | Male   | 77.6<br>(73.9–81.1) | 0.987<br>(0.851–1.13)          | 0.496<br>(0.42–0.588)          | 5.51<br>(2.07–8.37)          | 6.49<br>(3.08–9.31)    | 6<br>(2.6–8.84)        |
|                                        | Female | 79.6<br>(75.5–83.3) | 0.0708<br>(0.0545–0.0915)      | 0.0113<br>(0.00921–0.0144)     | 5.09<br>(1.26–8.15)          | 5.16<br>(1.36–8.2)     | 5.1<br>(1.28–8.16)     |
| Oman                                   | Male   | 77.8<br>(74.6–80.5) | 0.568<br>(0.518–0.617)         | 0.304<br>(0.281–0.331)         | 3.17<br>(0.408–5.21)         | 3.74<br>(0.97–5.79)    | 3.47<br>(0.702–5.53)   |
|                                        | Female | 83.1<br>(79.2–86.5) | 0.104<br>(0.0936–0.115)        | 0.0425<br>(0.0387–0.0468)      | 3.32<br>(-0.145–6.07)        | 3.43<br>(-0.0344–6.17) | 3.36<br>(-0.102–6.12)  |
| Palestine                              | Male   | 77.2<br>(72.7–79.7) | 1.65<br>(1.45–1.82)            | 1.06<br>(0.936–1.17)           | 5.02<br>(0.538–9.64)         | 6.67<br>(1.96–11.3)    | 6.08<br>(1.45–10.7)    |
|                                        | Female | 80.6<br>(77.7–82.7) | 0.187<br>(0.172–0.202)         | 0.0542<br>(0.0473–0.0641)      | 4.1<br>(1.15–6.66)           | 4.28<br>(1.33–6.85)    | 4.15<br>(1.2–6.72)     |
| Qatar                                  | Male   | 81.1<br>(78.9–83.3) | 0.782<br>(0.683–0.905)         | 0.389<br>(0.337–0.447)         | 3.26<br>(1.54–4.69)          | 4.04<br>(2.27–5.53)    | 3.65<br>(1.9–5.11)     |
|                                        | Female | 81.5<br>(79.3–83.5) | 0.0472<br>(0.0425–0.0533)      | 0.012<br>(0.00843–0.0165)      | 1.42<br>(-0.287–2.83)        | 1.47<br>(-0.241–2.88)  | 1.44<br>(-0.278–2.85)  |
| Saudi Arabia                           | Male   | 75.5<br>(71.7–78.5) | 1.18<br>(1.03–1.37)            | 0.678<br>(0.57–0.814)          | 2.49<br>(-0.82–4.88)         | 3.67<br>(0.476–5.97)   | 3.17<br>(-0.0102–5.48) |
|                                        | Female | 78.7<br>(74.9–81.6) | 0.142<br>(0.119–0.177)         | 0.05<br>(0.0397–0.0647)        | 2.84<br>(-0.0445–5.13)       | 2.98<br>(0.113–5.27)   | 2.89<br>(0.0124–5.18)  |
| Sudan                                  | Male   | 74.3<br>(66.4–79.4) | 1.21<br>(0.701–1.45)           | 0.699<br>(0.382–0.829)         | 5.84<br>(-1.38–10.1)         | 7.05<br>(-0.585–11.3)  | 6.54<br>(-0.926–10.8)  |
|                                        | Female | 76.7<br>(67.8–82.5) | 0.152<br>(0.089–0.193)         | 0.0249<br>(0.0132–0.031)       | 5.42<br>(-2.91–10.4)         | 5.57<br>(-2.79–10.5)   | 5.44<br>(-2.89–10.4)   |
| Syrian Arab Republic                   | Male   | 72<br>(62.4–79.6)   | 1.49<br>(0.957–1.96)           | 0.846<br>(0.552–1.13)          | 4.05<br>(-9–17.4)            | 5.54<br>(-7.74–19.1)   | 4.89<br>(-8.28–18.3)   |
|                                        | Female | 76.8<br>(70.8–81.5) | 0.207<br>(0.146–0.283)         | 0.0364<br>(0.0253–0.0519)      | 3.25<br>(-3.71–10.2)         | 3.45<br>(-3.53–10.4)   | 3.28<br>(-3.68–10.3)   |
| Tunisia                                | Male   | 79.5<br>(76.1–82.7) | 1.87<br>(1.6–2.15)             | 1.27<br>(1.09–1.45)            | 5.49<br>(3.41–7.36)          | 7.37<br>(5.19–9.28)    | 6.76<br>(4.64–8.7)     |
|                                        | Female | 84.2<br>(81–87.2)   | 0.136<br>(0.117–0.157)         | 0.0334<br>(0.029–0.0391)       | 4.94<br>(2.57–7)             | 5.07<br>(2.72–7.13)    | 4.97<br>(2.61–7.03)    |
| Turkey                                 | Male   | 79.6<br>(77.6–81.7) | 1.76<br>(1.56–1.99)            | 0.948<br>(0.841–1.05)          | 4.61<br>(3.43–5.56)          | 6.37<br>(5.06–7.44)    | 5.55<br>(4.29–6.58)    |
|                                        | Female | 83.5<br>(81.5–85.3) | 0.285<br>(0.255–0.32)          | 0.0774<br>(0.067–0.0899)       | 3.39<br>(1.94–4.52)          | 3.68<br>(2.24–4.82)    | 3.47<br>(2.02–4.6)     |
| United Arab Emirates                   | Male   | 81.8<br>(79.6–84)   | 0.963<br>(0.881–1.05)          | 0.648<br>(0.584–0.715)         | 2.83<br>(1.04–4.17)          | 3.79<br>(1.91–5.19)    | 3.47<br>(1.61–4.87)    |
|                                        | Female | 73.6<br>(72.3–74.8) | 0.122<br>(0.111–0.136)         | 0.0126<br>(0.0109–0.0148)      | 1.72<br>(0.533–2.55)         | 1.84<br>(0.667–2.68)   | 1.73<br>(0.547–2.57)   |
| Yemen                                  | Male   | 72.9<br>(67.6–77.5) | 1.99<br>(1.67–2.26)            | 1.41<br>(1.19–1.6)             | 6.52<br>(2.1–11.1)           | 8.51<br>(4.21–13)      | 7.93<br>(3.6–12.4)     |
|                                        | Female | 77<br>(71.7–82)     | 0.648<br>(0.511–0.826)         | 0.273<br>(0.217–0.361)         | 6.79<br>(1.9–11.3)           | 7.44<br>(2.65–11.9)    | 7.06<br>(2.22–11.6)    |
| South Asia                             | Male   | 76.4<br>(72.5–79.5) | 1.23<br>(1.13–1.32)            | 0.797<br>(0.736–0.851)         | 6.93<br>(3.56–9.76)          | 8.15<br>(4.83–11)      | 7.72<br>(4.37–10.6)    |
|                                        | Female | 79.5<br>(75.7–82.8) | 0.301<br>(0.26–0.345)          | 0.157<br>(0.135–0.18)          | 6.74<br>(3.2–9.69)           | 7.05<br>(3.52–9.99)    | 6.9<br>(3.35–9.86)     |
| Bangladesh                             | Male   | 76.4<br>(74.9–82.4) | 1.23<br>(1.13–1.32)            | 0.797<br>(0.736–0.851)         | 6.93<br>(3.56–9.76)          | 8.15<br>(4.83–11)      | 7.72<br>(4.37–10.6)    |
|                                        | Female | 79.5<br>(75.7–82.8) | 0.301<br>(0.26–0.345)          | 0.157<br>(0.135–0.18)          | 6.74<br>(3.2–9.69)           | 7.05<br>(3.52–9.99)    | 6.9<br>(3.35–9.86)     |
| Bhutan                                 | Male   | 79.3<br>(74.9–82.4) | 1.96<br>(1.71–2.23)            | 1.43<br>(1.26–1.64)            | 6.25<br>(2.89–9.19)          | 8.21<br>(4.92–11.1)    | 7.69<br>(4.38–10.6)    |
|                                        | Female | 81.7<br>(77.4–84.8) | 0.235<br>(0.196–0.285)         | 0.116<br>(0.0952–0.14)         | 6.1<br>(2.7–8.99)            | 6.33<br>(2.97–9.22)    | 6.21<br>(2.84–9.11)    |
| India                                  | Male   | 78.5<br>(74.4–81.7) | 1.07<br>(0.909–1.23)           | 0.784<br>(0.653–0.92)          | 7.03<br>(3.56–10.1)          | 8.09<br>(4.62–11.2)    | 7.81<br>(4.3–10.9)     |
|                                        | Female | 80.9<br>(77–84)     | 0.257<br>(0.21–0.335)          | 0.0699<br>(0.0576–0.0926)      | 6.76<br>(3.48–9.55)          | 7.02<br>(3.74–9.79)    | 6.83<br>(3.55–9.63)    |
| Nepal                                  | Male   | 76.3<br>(72.3–79.6) | 1.14<br>(1.05–1.25)            | 0.72<br>(0.658–0.783)          | 6.78<br>(3.33–9.42)          | 7.93<br>(4.52–10.6)    | 7.5<br>(4.06–10.2)     |
|                                        | Female | 79.9<br>(76.2–83.4) | 0.314<br>(0.263–0.36)          | 0.171<br>(0.143–0.198)         | 6.65<br>(3.07–9.7)           | 6.97<br>(3.4–10)       | 6.82<br>(3.24–9.88)    |
| Pakistan                               | Male   | 77.2<br>(73.1–80.4) | 1.25<br>(1.11–1.38)            | 0.866<br>(0.768–0.96)          | 7.08<br>(3.8–9.74)           | 8.33<br>(5.1–11)       | 7.94<br>(4.66–10.6)    |
|                                        | Female | 80.7<br>(76.9–83.9) | 0.513<br>(0.42–0.609)          | 0.276<br>(0.226–0.327)         | 7.24<br>(3.98–9.91)          | 7.75<br>(4.56–10.4)    | 7.52<br>(4.27–10.2)    |
| Southeast Asia, East Asia, and Oceania | Male   | 75.3<br>(70.6–79.6) | 1.27<br>(1.1–1.43)             | 0.869<br>(0.754–0.969)         | 8.01<br>(4.23–10.9)          | 9.28<br>(5.46–12.1)    | 8.87<br>(5.04–11.7)    |
|                                        | Female | 75.9<br>(71.3–79.5) | 0.197<br>(0.162–0.242)         | 0.047<br>(0.0357–0.0637)       | 7.45<br>(3.66–10.3)          | 7.65<br>(3.87–10.5)    | 7.5<br>(3.71–10.4)     |
| East Asia                              | Male   | 77.2<br>(75–78.9)   | 2.35<br>(2.19–2.5)             | 1.57<br>(1.46–1.68)            | 3.82<br>(2.39–4.94)          | 6.16<br>(4.62–7.38)    | 5.39<br>(3.88–6.57)    |
|                                        | Female | 82.9<br>(80.9–84.7) | 0.61<br>(0.559–0.671)          | 0.383<br>(0.34–0.437)          | 3.7<br>(1.9–5.07)            | 4.31<br>(2.48–5.69)    | 4.08<br>(2.25–5.46)    |
| China                                  | Male   | 78.7<br>(76.3–80.8) | 2.56<br>(2.34–2.79)            | 1.75<br>(1.61–1.91)            | 3.53<br>(2.32–4.38)          | 6.08<br>(4.75–7.09)    | 5.28<br>(3.97–6.24)    |
|                                        | Female | 84.7<br>(82.5–86.7) | 0.741<br>(0.673–0.822)         | 0.492<br>(0.435–0.561)         | 3.63<br>(2.06–4.83)          | 4.37<br>(2.75–5.63)    | 4.12<br>(2.51–5.38)    |
| Democratic People's Republic of Korea  | Male   | 78.8<br>(76.3–80.9) | 2.57<br>(2.34–2.8)             | 1.76<br>(1.61–1.93)            | 3.54<br>(2.36–4.37)          | 6.1<br>(4.78–7.11)     | 5.3<br>(4.01–6.25)     |
|                                        | Female | 84.7<br>(82.5–86.8) | 0.756<br>(0.685–0.842)         | 0.506<br>(0.447–0.577)         | 3.67<br>(2.1–4.87)           | 4.42<br>(2.81–5.69)    | 4.17<br>(2.57–5.44)    |
| Taiwan (Province of China)             | Male   | 74.8<br>(71.1–77.7) | 2.61<br>(2.35–2.87)            | 1.66<br>(1.48–1.83)            | 4.51<br>(1.76–6.68)          | 7.12<br>(4.4–9.36)     | 6.16<br>(3.44–8.39)    |
|                                        | Female | 79.6<br>(75.6–82.6) | 0.542<br>(0.458–0.636)         | 0.207<br>(0.178–0.24)          | 3.35<br>(0.564–5.52)         | 3.89<br>(1.13–6.06)    | 3.56<br>(0.782–5.73)   |
| Oceania                                | Male   | 80.4<br>(79.6–81.2) | 1.69<br>(1.59–1.78)            | 1.03<br>(0.973–1.09)           | 2.38<br>(1.82–3.04)          | 4.07<br>(3.43–4.76)    | 3.42<br>(2.81–4.09)    |
|                                        | Female | 86.5<br>(85.7–87.2) | 0.072<br>(0.0656–0.0796)       | 0.00691<br>(0.00627–0.00768)   | 1.89<br>(1.24–2.55)          | 1.96<br>(1.31–2.62)    | 1.9<br>(1.25–2.56)     |
| Oceania                                | Male   | 71.5<br>(67.1–74.9) | 1.46<br>(1.27–1.66)            | 0.738<br>(0.63–0.867)          | 6.66<br>(2.6–9.91)           | 8.13<br>(4.17–11.4)    | 7.4<br>(3.4–10.7)      |
|                                        | Female | 74<br>(69.3–77.7)   | 0.733<br>(0.61–0.876)          | 0.307<br>(0.247–0.385)         | 6.12<br>(1.71–10.2)          | 6.86<br>(2.6–10.8)     | 6.43<br>(2.1–10.5)     |

Supplementary Results Table S3. Life expectancy at birth by location, sex, and scenario

| Location                         | Sex    | 2050                |                                |                                | Change between 2022 and 2050 |                       |                       |
|----------------------------------|--------|---------------------|--------------------------------|--------------------------------|------------------------------|-----------------------|-----------------------|
|                                  |        | Reference           | Difference between             |                                | Reference                    | Elimination - 2023    | Elimination - 2050    |
|                                  |        |                     | Elimination-2023 and Reference | Elimination-2050 and Reference |                              |                       |                       |
| American Samoa                   | Male   | 72.4<br>(69.4-74.7) | 1.73<br>(1.6-1.88)             | 1.06<br>(0.96-1.18)            | 3<br>(0.768-4.77)            | 4.73<br>(2.51-6.49)   | 4.06<br>(1.89-5.8)    |
| American Samoa                   | Female | 75.1<br>(71.8-77.8) | 0.633<br>(0.55-0.735)          | 0.296<br>(0.246-0.361)         | 2.21<br>(-0.255-4.25)        | 2.85<br>(0.398-4.88)  | 2.51<br>(0.0611-4.53) |
| Cook Islands                     | Male   | 75.6<br>(73.1-77.8) | 1.34<br>(1.21-1.46)            | 0.709<br>(0.631-0.792)         | 2.49<br>(0.496-3.95)         | 3.84<br>(1.85-5.34)   | 3.2<br>(1.23-4.71)    |
| Cook Islands                     | Female | 83<br>(80.5-85.3)   | 0.242<br>(0.205-0.289)         | 0.0599<br>(0.0475-0.0778)      | 3.12<br>(1.11-4.63)          | 3.36<br>(1.38-4.87)   | 3.17<br>(1.18-4.69)   |
| Fiji                             | Male   | 70.9<br>(66.9-74.6) | 1.5<br>(1.3-1.71)              | 0.957<br>(0.801-1.13)          | 4.87<br>(2.11-7.21)          | 6.38<br>(3.69-8.66)   | 5.83<br>(3.14-8.11)   |
| Fiji                             | Female | 75.4<br>(71.1-78.9) | 0.428<br>(0.355-0.512)         | 0.217<br>(0.171-0.275)         | 4.97<br>(1.72-7.52)          | 5.39<br>(2.2-7.92)    | 5.18<br>(1.97-7.71)   |
| Guam                             | Male   | 80.6<br>(77.8-83)   | 1.66<br>(1.53-1.77)            | 0.898<br>(0.818-0.986)         | 6.47<br>(3.66-9)             | 8.13<br>(5.37-10.7)   | 7.37<br>(4.6-9.88)    |
| Guam                             | Female | 89.7<br>(86.7-92.2) | 0.756<br>(0.669-0.869)         | 0.315<br>(0.27-0.377)          | 6.15<br>(3.34-8.65)          | 6.91<br>(4.2-9.39)    | 6.47<br>(3.72-8.94)   |
| Kiribati                         | Male   | 67<br>(62.6-70.9)   | 3.32<br>(2.96-3.85)            | 2.39<br>(2.11-2.75)            | 5.72<br>(2.36-8.38)          | 9.04<br>(5.83-11.6)   | 8.11<br>(4.9-10.7)    |
| Kiribati                         | Female | 72.2<br>(67.9-76.1) | 1.38<br>(1.18-1.61)            | 0.945<br>(0.79-1.13)           | 5.1<br>(1.57-8.13)           | 6.49<br>(3.05-9.39)   | 6.05<br>(2.62-8.95)   |
| Marshall Islands                 | Male   | 67.6<br>(62.6-71.9) | 2.31<br>(1.99-2.66)            | 1.51<br>(1.3-1.76)             | 4.01<br>(0.301-6.91)         | 6.32<br>(2.76-9.07)   | 5.51<br>(1.95-8.28)   |
| Marshall Islands                 | Female | 70.4<br>(65.2-74.8) | 0.693<br>(0.55-0.825)          | 0.333<br>(0.255-0.417)         | 3.45<br>(-0.601-6.83)        | 4.15<br>(0.121-7.43)  | 3.79<br>(-0.24-7.11)  |
| Micronesia (Federated States of) | Male   | 67.6<br>(63.2-71.4) | 2.75<br>(2.43-3.07)            | 1.83<br>(1.59-2.1)             | 2.9<br>(-0.0819-5.29)        | 5.65<br>(2.79-8.02)   | 4.73<br>(1.86-7.06)   |
| Micronesia (Federated States of) | Female | 72.3<br>(68.2-76)   | 1.15<br>(0.968-1.39)           | 0.705<br>(0.565-0.881)         | 2.49<br>(-0.64-5.16)         | 3.65<br>(0.668-6.17)  | 3.2<br>(0.194-5.75)   |
| Nauru                            | Male   | 63.1<br>(57.4-67.9) | 2.5<br>(2.28-2.84)             | 1.74<br>(1.58-1.98)            | 3.74<br>(-0.567-7.12)        | 6.24<br>(2.13-9.57)   | 5.48<br>(1.37-8.8)    |
| Nauru                            | Female | 70.3<br>(64.8-74.8) | 1.24<br>(0.981-1.59)           | 0.714<br>(0.529-0.964)         | 4.44<br>(-0.31-7.66)         | 5.68<br>(1.25-8.81)   | 5.15<br>(0.649-8.34)  |
| Niue                             | Male   | 69.8<br>(66.8-72.3) | 1.69<br>(1.51-1.87)            | 1.16<br>(1.04-1.29)            | 4.16<br>(1.43-6.38)          | 5.84<br>(3.06-8.14)   | 5.32<br>(2.54-7.59)   |
| Niue                             | Female | 74<br>(70.6-76.9)   | 0.52<br>(0.419-0.615)          | 0.198<br>(0.154-0.249)         | 3.91<br>(0.885-6.39)         | 4.43<br>(1.42-6.87)   | 4.1<br>(1.11-6.55)    |
| Northern Mariana Islands         | Male   | 73.3<br>(71.1-75.2) | 1.7<br>(1.59-1.8)              | 0.946<br>(0.876-1.01)          | 2.18<br>(0.0927-3.72)        | 3.89<br>(1.78-5.48)   | 3.13<br>(1.05-4.68)   |
| Northern Mariana Islands         | Female | 78.6<br>(76.1-80.7) | 0.432<br>(0.385-0.48)          | 0.148<br>(0.127-0.172)         | 2.34<br>(0.19-4.01)          | 2.78<br>(0.655-4.43)  | 2.49<br>(0.359-4.14)  |
| Palau                            | Male   | 71.3<br>(67.4-74.3) | 2.27<br>(2.06-2.47)            | 1.55<br>(1.43-1.67)            | 5.71<br>(0.717-5.67)         | 5.78<br>(3.06-7.97)   | 5.06<br>(2.31-7.25)   |
| Palau                            | Female | 72.7<br>(69.2-75.2) | 0.567<br>(0.518-0.62)          | 0.234<br>(0.209-0.261)         | 2.24<br>(-0.249-4)           | 2.8<br>(0.361-4.58)   | 2.47<br>(0.011-4.24)  |
| Papua New Guinea                 | Male   | 71.8<br>(67.1-75.5) | 1.31<br>(1.11-1.52)            | 0.571<br>(0.471-0.701)         | 6.96<br>(2.76-10.8)          | 8.27<br>(4.15-12)     | 7.53<br>(3.42-11.3)   |
| Papua New Guinea                 | Female | 73.7<br>(68.8-77.6) | 0.737<br>(0.607-0.883)         | 0.288<br>(0.226-0.368)         | 6.61<br>(2.24-10.8)          | 7.35<br>(3.14-11.5)   | 6.9<br>(2.62-11.1)    |
| Samoa                            | Male   | 72.8<br>(69.3-75.8) | 2.14<br>(1.9-2.4)              | 1.29<br>(1.13-1.47)            | 4<br>(1.05-6.61)             | 6.14<br>(3.33-8.59)   | 5.29<br>(2.47-7.79)   |
| Samoa                            | Female | 73.9<br>(70.1-77.3) | 0.747<br>(0.606-0.913)         | 0.263<br>(0.199-0.337)         | 2.92<br>(-0.124-5.7)         | 3.67<br>(0.768-6.31)  | 3.19<br>(0.203-5.88)  |
| Solomon Islands                  | Male   | 67.4<br>(62.6-71.4) | 2.74<br>(2.45-2.99)            | 2.15<br>(1.91-2.36)            | 3.74<br>(0.36-6.9)           | 6.48<br>(3.03-9.46)   | 5.89<br>(2.41-8.9)    |
| Solomon Islands                  | Female | 71.6<br>(66.5-75.9) | 1.01<br>(0.825-1.2)            | 0.657<br>(0.529-0.796)         | 3.3<br>(-1.19-6.84)          | 4.31<br>(0.0569-7.73) | 3.96<br>(-0.362-7.41) |
| Tokelau                          | Male   | 73.2<br>(69.9-76)   | 1.71<br>(1.5-1.95)             | 0.973<br>(0.832-1.15)          | 4.98<br>(1.97-7.08)          | 6.69<br>(3.72-8.76)   | 5.95<br>(2.99-8)      |
| Tokelau                          | Female | 74.6<br>(70.5-78)   | 0.644<br>(0.54-0.752)          | 0.277<br>(0.225-0.34)          | 5.48<br>(1.85-8.01)          | 6.12<br>(2.5-8.62)    | 5.76<br>(2.15-8.26)   |
| Tonga                            | Male   | 74.2<br>(71-77)     | 2.3<br>(2.15-2.45)             | 1.63<br>(1.53-1.73)            | 3.52<br>(1.33-5.32)          | 5.82<br>(3.59-7.7)    | 5.15<br>(2.93-7.01)   |
| Tonga                            | Female | 79<br>(75.6-81.9)   | 0.513<br>(0.461-0.569)         | 0.176<br>(0.155-0.2)           | 3.22<br>(0.849-5.06)         | 3.73<br>(1.36-5.58)   | 3.39<br>(1.02-5.24)   |
| Tuvalu                           | Male   | 69.8<br>(65.4-73.2) | 2.61<br>(2.31-2.91)            | 1.78<br>(1.54-2.02)            | 3.83<br>(0.671-6.37)         | 6.44<br>(3.46-8.85)   | 5.61<br>(2.6-8.02)    |
| Tuvalu                           | Female | 74.5<br>(70.4-78)   | 1.04<br>(0.862-1.23)           | 0.6<br>(0.48-0.748)            | 3.68<br>(0.541-6.2)          | 4.72<br>(1.72-7.14)   | 4.28<br>(1.26-6.74)   |
| Vanuatu                          | Male   | 69.5<br>(65.7-73)   | 1.65<br>(1.42-1.85)            | 1.01<br>(0.867-1.15)           | 7.27<br>(3.37-10.8)          | 8.92<br>(5.13-12.5)   | 8.28<br>(4.46-11.8)   |
| Vanuatu                          | Female | 74.7<br>(71.1-78)   | 0.213<br>(0.178-0.252)         | 0.0571<br>(0.0475-0.0679)      | 5.79<br>(1.9-9.34)           | 6.01<br>(2.13-9.54)   | 5.85<br>(1.96-9.4)    |
| Southeast Asia                   | Male   | 75.2<br>(73.1-77.1) | 1.89<br>(1.8-2)                | 1.18<br>(1.12-1.25)            | 5.16<br>(3.31-6.82)          | 7.06<br>(5.14-8.74)   | 6.34<br>(4.44-8.02)   |
| Southeast Asia                   | Female | 80.3<br>(78.1-82.4) | 0.271<br>(0.257-0.286)         | 0.105<br>(0.0996-0.112)        | 4.55<br>(2.65-6.17)          | 4.82<br>(2.91-6.44)   | 4.65<br>(2.75-6.28)   |
| Cambodia                         | Male   | 72.9<br>(69.9-75.9) | 2.4<br>(2.21-2.61)             | 1.92<br>(1.76-2.08)            | 5.88<br>(4.17-7.42)          | 8.29<br>(6.47-10)     | 7.8<br>(5.99-9.5)     |
| Cambodia                         | Female | 77.5<br>(74.4-80.6) | 0.404<br>(0.372-0.442)         | 0.177<br>(0.163-0.195)         | 5.24<br>(3.2-6.93)           | 5.65<br>(3.62-7.35)   | 5.42<br>(3.39-7.11)   |
| Indonesia                        | Male   | 75.7<br>(72.8-78.5) | 2.08<br>(1.93-2.25)            | 1.27<br>(1.17-1.38)            | 6.22<br>(4.19-7.99)          | 8.3<br>(6.21-10.1)    | 7.49<br>(5.45-9.31)   |
| Indonesia                        | Female | 78.9<br>(76.3-81.6) | 0.252<br>(0.228-0.276)         | 0.0976<br>(0.0867-0.113)       | 5.43<br>(3.51-7.18)          | 5.68<br>(3.75-7.44)   | 5.52<br>(3.6-7.29)    |
| Lao People's Democratic Republic | Male   | 74.2<br>(70.8-77.2) | 2.77<br>(2.51-3)               | 2.14<br>(1.94-2.31)            | 8.29<br>(6.2-10.1)           | 11.1<br>(8.92-13)     | 10.4<br>(8.28-12.3)   |
| Lao People's Democratic Republic | Female | 78.3<br>(74.6-81.1) | 0.508<br>(0.451-0.58)          | 0.283<br>(0.252-0.322)         | 7.77<br>(5.49-9.83)          | 8.27<br>(5.99-10.4)   | 8.05<br>(5.77-10.1)   |
| Malaysia                         | Male   | 77.8<br>(75.8-79.2) | 1.65<br>(1.54-1.76)            | 0.857<br>(0.8-0.924)           | 5.2<br>(3.33-6.62)           | 6.85<br>(4.86-8.33)   | 6.06<br>(4.12-7.52)   |
| Malaysia                         | Female | 80.3<br>(78.8-81.5) | 0.139<br>(0.131-0.15)          | 0.0464<br>(0.0398-0.054)       | 3.31<br>(1.8-4.42)           | 3.45<br>(1.94-4.57)   | 3.36<br>(1.84-4.47)   |
| Maldives                         | Male   | 84.4<br>(81.7-86.7) | 2.15<br>(1.98-2.33)            | 1.74<br>(1.58-1.89)            | 4.64<br>(2.65-6.36)          | 6.8<br>(4.66-8.63)    | 6.38<br>(4.25-8.19)   |
| Maldives                         | Female | 87<br>(84.1-89.3)   | 0.401<br>(0.364-0.445)         | 0.159<br>(0.143-0.178)         | 4.7<br>(2.44-6.67)           | 5.1<br>(2.83-7.07)    | 4.86<br>(2.59-6.84)   |
| Mauritius                        | Male   | 76.7<br>(74.8-78.1) | 1.8<br>(1.69-1.92)             | 1.28<br>(1.2-1.36)             | 4.81<br>(3.07-6.31)          | 6.62<br>(4.79-8.19)   | 6.09<br>(4.29-7.64)   |
| Mauritius                        | Female | 82.1<br>(80.2-83.6) | 0.177<br>(0.168-0.185)         | 0.0384<br>(0.0362-0.0407)      | 3.94<br>(2.11-5.29)          | 4.12<br>(2.29-5.47)   | 3.98<br>(2.15-5.33)   |



Supplementary Results Table S3. Life expectancy at birth by location, sex, and scenario

| Location                         | Sex    | 2050                |                                |                                | Change between 2022 and 2050 |                      |                      |
|----------------------------------|--------|---------------------|--------------------------------|--------------------------------|------------------------------|----------------------|----------------------|
|                                  |        | Reference           | Difference between             |                                | Reference                    | Elimination - 2023   | Elimination - 2050   |
|                                  |        |                     | Elimination-2023 and Reference | Elimination-2050 and Reference |                              |                      |                      |
| Myanmar                          | Male   | 71.5<br>(67.1-74.6) | 1.51<br>(1.3-1.67)             | 0.981<br>(0.84-1.09)           | 5.32<br>(1.95-9.2)           | 6.83<br>(3.31-10.7)  | 6.3<br>(2.84-10.1)   |
| Myanmar                          | Female | 79<br>(74.8-81.8)   | 0.509<br>(0.428-0.565)         | 0.272<br>(0.233-0.303)         | 6.19<br>(2.88-9.07)          | 6.7<br>(3.4-9.56)    | 6.47<br>(3.17-9.33)  |
| Philippines                      | Male   | 74.9<br>(72.2-77.9) | 1.53<br>(1.45-1.62)            | 0.831<br>(0.782-0.882)         | 5.87<br>(4.23-7.21)          | 7.4<br>(5.75-8.7)    | 6.7<br>(5.05-8.02)   |
| Philippines                      | Female | 79.5<br>(77.1-81.7) | 0.381<br>(0.362-0.403)         | 0.175<br>(0.166-0.188)         | 4.2<br>(2.63-5.52)           | 4.58<br>(3.01-5.91)  | 4.37<br>(2.8-5.7)    |
| Seychelles                       | Male   | 75.9<br>(74.3-77.3) | 1.76<br>(1.65-1.87)            | 1.28<br>(1.2-1.38)             | 4.54<br>(3.37-5.49)          | 6.3<br>(5.13-7.31)   | 5.82<br>(4.65-6.82)  |
| Seychelles                       | Female | 80.4<br>(78.7-81.8) | 0.196<br>(0.184-0.21)          | 0.0397<br>(0.037-0.0423)       | 3.18<br>(1.8-4.25)           | 3.38<br>(2-4.45)     | 3.22<br>(1.84-4.29)  |
| Sri Lanka                        | Male   | 78.8<br>(74.1-82.9) | 1.09<br>(0.957-1.19)           | 0.668<br>(0.583-0.727)         | 3.89<br>(-0.0564-7.91)       | 4.98<br>(0.909-9.05) | 4.56<br>(0.548-8.6)  |
| Sri Lanka                        | Female | 84.4<br>(80.5-87.8) | 0.13<br>(0.113-0.152)          | 0.0429<br>(0.0362-0.0505)      | 3.53<br>(0.619-6.48)         | 3.66<br>(0.733-6.61) | 3.57<br>(0.657-6.52) |
| Thailand                         | Male   | 78.7<br>(75.1-82.2) | 1.83<br>(1.69-2)               | 1.17<br>(1.08-1.27)            | 5.01<br>(3.4-6.18)           | 6.84<br>(5.08-8.19)  | 6.18<br>(4.45-7.46)  |
| Thailand                         | Female | 84.8<br>(82.3-87.5) | 0.209<br>(0.187-0.234)         | 0.0389<br>(0.0349-0.0437)      | 3.58<br>(2.04-4.8)           | 3.79<br>(2.21-5.04)  | 3.62<br>(2.07-4.84)  |
| Timor-Leste                      | Male   | 75.1<br>(71.1-78.3) | 2.09<br>(1.85-2.3)             | 1.24<br>(1.09-1.37)            | 6.04<br>(3.18-8.41)          | 8.14<br>(5.21-10.5)  | 7.28<br>(4.38-9.67)  |
| Timor-Leste                      | Female | 79<br>(75.2-81.9)   | 0.226<br>(0.203-0.248)         | 0.0712<br>(0.0635-0.0786)      | 6.87<br>(4.04-9.13)          | 7.1<br>(4.26-9.35)   | 6.95<br>(4.11-9.2)   |
| Viet Nam                         | Male   | 72.4<br>(69.8-74.7) | 1.82<br>(1.63-1.98)            | 1.17<br>(1.04-1.29)            | 2.02<br>(0.102-3.46)         | 3.83<br>(1.91-5.3)   | 3.18<br>(1.29-4.61)  |
| Viet Nam                         | Female | 82.2<br>(79.7-84.3) | 0.158<br>(0.142-0.175)         | 0.0417<br>(0.0375-0.0463)      | 3.39<br>(1.63-4.83)          | 3.55<br>(1.8-4.97)   | 3.43<br>(1.68-4.86)  |
| Sub-Saharan Africa               | Male   | 71.8<br>(68.1-74.4) | 0.553<br>(0.513-0.585)         | 0.314<br>(0.291-0.338)         | 9.56<br>(6.42-11.7)          | 10.1<br>(6.96-12.3)  | 9.88<br>(6.74-12.1)  |
| Sub-Saharan Africa               | Female | 75.8<br>(72.1-78.2) | 0.106<br>(0.0965-0.116)        | 0.0488<br>(0.0437-0.0543)      | 9.19<br>(5.98-11.2)          | 9.3<br>(6.08-11.3)   | 9.24<br>(6.03-11.2)  |
| Central Sub-Saharan Africa       | Male   | 70.1<br>(65.8-73.4) | 0.742<br>(0.666-0.819)         | 0.473<br>(0.418-0.53)          | 8.76<br>(5.22-11.5)          | 9.51<br>(5.98-12.3)  | 9.24<br>(5.72-12)    |
| Central Sub-Saharan Africa       | Female | 74.4<br>(70.1-77.7) | 0.0843<br>(0.0701-0.101)       | 0.0356<br>(0.0283-0.0432)      | 8.55<br>(5.5-10.9)           | 8.63<br>(5.58-11)    | 8.58<br>(5.54-11)    |
| Angola                           | Male   | 70.8<br>(66.4-74.3) | 1.08<br>(0.974-1.17)           | 0.771<br>(0.692-0.835)         | 8.58<br>(5.61-11)            | 9.66<br>(6.68-12.1)  | 9.35<br>(6.39-11.8)  |
| Angola                           | Female | 75.3<br>(70.7-78.8) | 0.142<br>(0.122-0.165)         | 0.0599<br>(0.0482-0.0733)      | 8.76<br>(5.63-10.9)          | 8.9<br>(5.78-11.1)   | 8.82<br>(5.7-11)     |
| Central African Republic         | Male   | 61<br>(53.6-66.5)   | 0.68<br>(0.433-0.782)          | 0.461<br>(0.291-0.53)          | 11.7<br>(4.36-20)            | 12.4<br>(4.94-20.8)  | 12.2<br>(4.76-20.5)  |
| Central African Republic         | Female | 67.9<br>(58.8-73.5) | 0.0827<br>(0.0489-0.103)       | 0.0346<br>(0.0196-0.0445)      | 12<br>(3.12-20)              | 12<br>(3.17-20.1)    | 12<br>(3.14-20)      |
| Congo                            | Male   | 70.1<br>(65.6-73.6) | 1.15<br>(1.02-1.26)            | 0.822<br>(0.727-0.898)         | 6.55<br>(2.76-9.22)          | 7.7<br>(3.83-10.4)   | 7.38<br>(3.53-10.1)  |
| Congo                            | Female | 72.4<br>(68-75.9)   | 0.0788<br>(0.0636-0.0949)      | 0.0333<br>(0.025-0.042)        | 7.49<br>(4.29-9.81)          | 7.57<br>(4.38-9.88)  | 7.52<br>(4.33-9.84)  |
| Democratic Republic of the Congo | Male   | 70.3<br>(65.6-73.8) | 0.6<br>(0.524-0.687)           | 0.349<br>(0.298-0.412)         | 8.44<br>(4.42-11.4)          | 9.04<br>(4.99-12)    | 8.79<br>(4.76-11.7)  |
| Democratic Republic of the Congo | Female | 74.6<br>(70-78.1)   | 0.0642<br>(0.051-0.0827)       | 0.0279<br>(0.0214-0.0357)      | 8.04<br>(4.6-11)             | 8.11<br>(4.66-11)    | 8.07<br>(4.63-11)    |
| Equatorial Guinea                | Male   | 70<br>(64.8-74)     | 0.887<br>(0.731-1.01)          | 0.52<br>(0.428-0.608)          | 7.25<br>(2.93-10.7)          | 8.14<br>(3.78-11.7)  | 7.77<br>(3.43-11.3)  |
| Equatorial Guinea                | Female | 75.1<br>(69.7-79.9) | 0.069<br>(0.0558-0.081)        | 0.0208<br>(0.0159-0.0258)      | 8.72<br>(4.69-12)            | 8.79<br>(4.74-12.1)  | 8.74<br>(4.71-12.1)  |
| Gabon                            | Male   | 69.8<br>(65.9-72.9) | 0.854<br>(0.759-0.971)         | 0.499<br>(0.444-0.569)         | 5.94<br>(3.3-8.1)            | 6.8<br>(4.12-9.03)   | 6.44<br>(3.79-8.66)  |
| Gabon                            | Female | 76.1<br>(72.4-79.7) | 0.0825<br>(0.0692-0.0964)      | 0.0169<br>(0.0133-0.021)       | 6.49<br>(4.32-8.2)           | 6.57<br>(4.41-8.28)  | 6.51<br>(4.34-8.21)  |
| Eastern Sub-Saharan Africa       | Male   | 72.5<br>(69.4-74.8) | 0.596<br>(0.557-0.638)         | 0.374<br>(0.348-0.403)         | 9.76<br>(6.85-11.8)          | 10.4<br>(7.45-12.4)  | 10.1<br>(7.23-12.2)  |
| Eastern Sub-Saharan Africa       | Female | 76.6<br>(73.3-78.8) | 0.14<br>(0.125-0.155)          | 0.0822<br>(0.0732-0.0919)      | 9.3<br>(6.62-11.2)           | 9.44<br>(6.76-11.4)  | 9.38<br>(6.7-11.3)   |
| Burundi                          | Male   | 71.4<br>(67.2-75)   | 0.587<br>(0.519-0.649)         | 0.375<br>(0.327-0.424)         | 11.8<br>(7.82-17.3)          | 12.4<br>(8.42-17.8)  | 12.2<br>(8.21-17.6)  |
| Burundi                          | Female | 75.6<br>(71.5-78.9) | 0.0813<br>(0.0685-0.0951)      | 0.0249<br>(0.019-0.0319)       | 11.1<br>(7.43-15.1)          | 11.1<br>(7.51-15.2)  | 11.1<br>(7.45-15.1)  |
| Comoros                          | Male   | 73.8<br>(70-76.7)   | 0.837<br>(0.775-0.896)         | 0.583<br>(0.54-0.625)          | 6.2<br>(3.33-8.16)           | 7.04<br>(4.16-9.03)  | 6.79<br>(3.9-8.77)   |
| Comoros                          | Female | 76<br>(72.4-78.8)   | 0.107<br>(0.0949-0.119)        | 0.0339<br>(0.0302-0.0381)      | 6.23<br>(3.48-8.24)          | 6.33<br>(3.59-8.35)  | 6.26<br>(3.52-8.27)  |
| Djibouti                         | Male   | 72.7<br>(68.4-76.2) | 1.46<br>(1.32-1.62)            | 1.01<br>(0.916-1.12)           | 6.57<br>(4.02-8.54)          | 8.03<br>(5.45-10)    | 7.58<br>(5.01-9.56)  |
| Djibouti                         | Female | 77.2<br>(72.9-80.6) | 0.207<br>(0.183-0.231)         | 0.0857<br>(0.0751-0.0964)      | 7.4<br>(5.07-9.33)           | 7.61<br>(5.28-9.54)  | 7.49<br>(5.16-9.42)  |
| Eritrea                          | Male   | 69.3<br>(64.5-72.6) | 0.524<br>(0.428-0.619)         | 0.277<br>(0.218-0.345)         | 8.83<br>(5.44-11.4)          | 9.36<br>(5.98-12)    | 9.11<br>(5.74-11.7)  |
| Eritrea                          | Female | 74.4<br>(70.4-77.8) | 0.015<br>(0.0128-0.0172)       | 0.00388<br>(0.00321-0.00458)   | 8.35<br>(5.63-10.5)          | 8.37<br>(5.65-10.5)  | 8.36<br>(5.64-10.5)  |
| Ethiopia                         | Male   | 75.8<br>(72.2-78.4) | 0.373<br>(0.338-0.408)         | 0.214<br>(0.193-0.236)         | 9.12<br>(6.6-11.1)           | 9.49<br>(6.98-11.5)  | 9.33<br>(6.82-11.3)  |
| Ethiopia                         | Female | 78.9<br>(75.8-81.4) | 0.0188<br>(0.0155-0.022)       | 0.00688<br>(0.00529-0.00856)   | 8.52<br>(6.21-10.3)          | 8.54<br>(6.23-10.3)  | 8.53<br>(6.22-10.3)  |
| Kenya                            | Male   | 73.6<br>(70.7-76.4) | 0.467<br>(0.391-0.527)         | 0.22<br>(0.183-0.25)           | 8.2<br>(5.77-10)             | 8.67<br>(6.28-10.5)  | 8.42<br>(6.01-10.2)  |
| Kenya                            | Female | 77.8<br>(75.1-80.2) | 0.0722<br>(0.0583-0.106)       | 0.0224<br>(0.0183-0.0319)      | 7.19<br>(5.11-8.93)          | 7.27<br>(5.17-9)     | 7.22<br>(5.13-8.95)  |
| Madagascar                       | Male   | 72<br>(67.9-75.5)   | 0.5<br>(0.424-0.571)           | 0.205<br>(0.171-0.238)         | 11.3<br>(7.9-15.2)           | 11.8<br>(8.44-15.7)  | 11.5<br>(8.13-15.4)  |
| Madagascar                       | Female | 73.9<br>(70-77.2)   | 0.0674<br>(0.0582-0.0763)      | 0.017<br>(0.0145-0.0196)       | 10.1<br>(6.92-13.2)          | 10.2<br>(6.99-13.2)  | 10.1<br>(6.93-13.2)  |
| Malawi                           | Male   | 69.5<br>(65-72.8)   | 1.15<br>(1.04-1.25)            | 0.904<br>(0.817-0.985)         | 10.3<br>(6.64-13.2)          | 11.5<br>(7.75-14.4)  | 11.2<br>(7.51-14.1)  |
| Malawi                           | Female | 76.1<br>(71.9-79.9) | 0.121<br>(0.101-0.143)         | 0.0703<br>(0.0565-0.084)       | 11.2<br>(8-14)               | 11.4<br>(8.13-14.1)  | 11.3<br>(8.08-14)    |
| Mozambique                       | Male   | 68.7<br>(64.7-71.8) | 0.798<br>(0.717-0.864)         | 0.55<br>(0.492-0.598)          | 11.8<br>(8.82-14.4)          | 12.6<br>(9.55-15.2)  | 12.3<br>(9.33-15)    |
| Mozambique                       | Female | 76<br>(71.6-80)     | 0.125<br>(0.104-0.142)         | 0.0288<br>(0.0226-0.0359)      | 12.9<br>(9.69-15.4)          | 13<br>(9.79-15.6)    | 12.9<br>(9.72-15.5)  |

Supplementary Results Table S3. Life expectancy at birth by location, sex, and scenario

| Location                    | Sex    | 2050                |                                |                                | Change between 2022 and 2050 |                       |                       |
|-----------------------------|--------|---------------------|--------------------------------|--------------------------------|------------------------------|-----------------------|-----------------------|
|                             |        | Reference           | Difference between             |                                | Reference                    | Elimination - 2023    | Elimination - 2050    |
|                             |        |                     | Elimination-2023 and Reference | Elimination-2050 and Reference |                              |                       |                       |
| Rwanda                      | Male   | 74.4<br>(70.8-77.2) | 1.24<br>(1.1-1.35)             | 1.02<br>(0.908-1.11)           | 8.32<br>(6.1-10.3)           | 9.55<br>(7.23-11.6)   | 9.34<br>(7.04-11.3)   |
| Rwanda                      | Female | 78.1<br>(75-80.8)   | 0.644<br>(0.571-0.734)         | 0.501<br>(0.445-0.569)         | 7.94<br>(5.74-9.52)          | 8.58<br>(6.39-10.2)   | 8.44<br>(6.25-10)     |
| Somalia                     | Male   | 63.2<br>(55.8-68.6) | 0.815<br>(0.698-0.939)         | 0.558<br>(0.478-0.644)         | 8.2<br>(1.96-12.5)           | 9.01<br>(2.75-13.4)   | 8.76<br>(2.51-13.1)   |
| Somalia                     | Female | 69.1<br>(61.2-74.4) | 0.118<br>(0.1-0.136)           | 0.0533<br>(0.0458-0.0628)      | 8.87<br>(1.77-13.2)          | 8.99<br>(1.88-13.3)   | 8.92<br>(1.83-13.2)   |
| South Sudan                 | Male   | 66.9<br>(59.6-72.6) | 0.645<br>(0.539-0.718)         | 0.386<br>(0.321-0.435)         | 11.7<br>(5.79-15.7)          | 12.3<br>(6.44-16.3)   | 12.1<br>(6.2-16)      |
| South Sudan                 | Female | 72<br>(63.5-77.6)   | 0.0935<br>(0.074-0.109)        | 0.037<br>(0.0299-0.0445)       | 11.8<br>(4.47-16.7)          | 11.8<br>(4.55-16.8)   | 11.8<br>(4.5-16.7)    |
| Uganda                      | Male   | 72.9<br>(69.3-75.3) | 0.357<br>(0.316-0.391)         | 0.149<br>(0.129-0.168)         | 10.6<br>(7.93-13.5)          | 11<br>(8.28-13.8)     | 10.8<br>(8.08-13.6)   |
| Uganda                      | Female | 78.5<br>(74.9-81)   | 0.148<br>(0.128-0.165)         | 0.0676<br>(0.0581-0.0759)      | 9.75<br>(7.63-12.4)          | 9.9<br>(7.77-12.6)    | 9.82<br>(7.7-12.5)    |
| United Republic of Tanzania | Male   | 74.6<br>(71.4-77.3) | 0.767<br>(0.687-0.854)         | 0.526<br>(0.462-0.601)         | 8.64<br>(6.31-10.5)          | 9.41<br>(7.2-11.2)    | 9.16<br>(6.94-11)     |
| United Republic of Tanzania | Female | 76.8<br>(73.8-79.3) | 0.322<br>(0.288-0.359)         | 0.244<br>(0.217-0.273)         | 7.77<br>(5.67-9.52)          | 8.09<br>(6.03-9.84)   | 8.01<br>(5.94-9.76)   |
| Zambia                      | Male   | 69.8<br>(66.1-73.4) | 0.758<br>(0.699-0.833)         | 0.461<br>(0.42-0.511)          | 9.04<br>(6.66-11.4)          | 9.79<br>(7.42-12.1)   | 9.5<br>(7.13-11.8)    |
| Zambia                      | Female | 75<br>(70.9-78.9)   | 0.237<br>(0.211-0.269)         | 0.135<br>(0.119-0.154)         | 9.73<br>(7.46-11.8)          | 9.97<br>(7.7-12.1)    | 9.87<br>(7.6-12)      |
| Southern Sub-Saharan Africa | Male   | 68.9<br>(66.5-70.8) | 1.08<br>(1.03-1.14)            | 0.649<br>(0.608-0.697)         | 9.04<br>(7.05-10.5)          | 10.1<br>(8.11-11.6)   | 9.69<br>(7.69-11.2)   |
| Southern Sub-Saharan Africa | Female | 75.1<br>(72.9-76.9) | 0.274<br>(0.261-0.286)         | 0.0901<br>(0.0828-0.0967)      | 9<br>(7.28-10.4)             | 9.27<br>(7.55-10.7)   | 9.09<br>(7.37-10.5)   |
| Botswana                    | Male   | 72.8<br>(69.9-75.1) | 1.67<br>(1.49-1.84)            | 1.2<br>(1.07-1.32)             | 11.7<br>(9.43-14.2)          | 13.4<br>(11.1-15.8)   | 12.9<br>(10.6-15.4)   |
| Botswana                    | Female | 78.2<br>(75.4-80.5) | 0.41<br>(0.377-0.444)          | 0.184<br>(0.167-0.2)           | 12.1<br>(9.86-14.5)          | 12.5<br>(10.3-14.9)   | 12.3<br>(10-14.7)     |
| Eswatini                    | Male   | 64.4<br>(60.1-68.3) | 0.576<br>(0.512-0.639)         | 0.32<br>(0.284-0.356)          | 10.9<br>(7.51-14.4)          | 11.4<br>(8.08-15)     | 11.2<br>(7.83-14.7)   |
| Eswatini                    | Female | 73.1<br>(68.2-78)   | 0.238<br>(0.198-0.278)         | 0.165<br>(0.136-0.193)         | 13.3<br>(10.6-17.6)          | 13.5<br>(10.8-17.8)   | 13.4<br>(10.7-17.8)   |
| Lesotho                     | Male   | 60.6<br>(56.7-63.8) | 2.43<br>(2.19-2.65)            | 1.91<br>(1.72-2.08)            | 10.9<br>(7.91-13.2)          | 13.3<br>(10.2-15.8)   | 12.8<br>(9.74-15.2)   |
| Lesotho                     | Female | 70.1<br>(65.9-73.7) | 0.365<br>(0.297-0.431)         | 0.333<br>(0.268-0.4)           | 13.6<br>(10.8-15.9)          | 14<br>(11.2-16.3)     | 14<br>(11.1-16.2)     |
| Namibia                     | Male   | 69.5<br>(65.6-72.8) | 0.846<br>(0.741-0.934)         | 0.603<br>(0.522-0.671)         | 9.13<br>(6.62-11.3)          | 9.98<br>(7.41-12.1)   | 9.74<br>(7.17-11.9)   |
| Namibia                     | Female | 77.5<br>(73.4-81.2) | 0.449<br>(0.406-0.498)         | 0.278<br>(0.25-0.309)          | 10.2<br>(8.11-12.1)          | 10.6<br>(8.54-12.5)   | 10.5<br>(8.37-12.4)   |
| South Africa                | Male   | 69.6<br>(67.7-71.2) | 0.887<br>(0.843-0.94)          | 0.438<br>(0.413-0.464)         | 8.34<br>(6.61-9.63)          | 9.22<br>(7.51-10.5)   | 8.77<br>(7.06-10.1)   |
| South Africa                | Female | 75.8<br>(74.3-77.1) | 0.258<br>(0.244-0.271)         | 0.0461<br>(0.0427-0.0496)      | 7.99<br>(6.6-9.2)            | 8.25<br>(6.86-9.46)   | 8.03<br>(6.65-9.25)   |
| Zimbabwe                    | Male   | 65.8<br>(61.8-69.2) | 1.8<br>(1.64-1.94)             | 1.42<br>(1.3-1.53)             | 9.5<br>(6.13-12.2)           | 11.3<br>(7.87-14.1)   | 10.9<br>(7.52-13.7)   |
| Zimbabwe                    | Female | 71.3<br>(67.2-74.8) | 0.334<br>(0.304-0.363)         | 0.249<br>(0.225-0.274)         | 10.2<br>(7.2-12.5)           | 10.4<br>(7.52-12.8)   | 10.4<br>(7.44-12.7)   |
| Western Sub-Saharan Africa  | Male   | 72.3<br>(68-75.6)   | 0.349<br>(0.287-0.384)         | 0.144<br>(0.119-0.162)         | 9.25<br>(5.15-11.9)          | 9.6<br>(5.52-12.2)    | 9.39<br>(5.3-12)      |
| Western Sub-Saharan Africa  | Female | 75.7<br>(71-78.9)   | 0.0485<br>(0.0388-0.0565)      | 0.0155<br>(0.0124-0.0182)      | 9.15<br>(5-11.7)             | 9.2<br>(5.05-11.8)    | 9.16<br>(5.01-11.7)   |
| Benin                       | Male   | 71.6<br>(62.1-75.7) | 0.299<br>(0.159-0.345)         | 0.0662<br>(0.0325-0.0782)      | 8.28<br>(-0.327-12)          | 8.58<br>(-0.187-12.3) | 8.34<br>(-0.292-12.1) |
| Benin                       | Female | 76<br>(61.3-79.9)   | 0.0455<br>(0.0217-0.0566)      | 0.0121<br>(0.00585-0.0155)     | 7.73<br>(-6.46-11.8)         | 7.77<br>(-6.43-11.8)  | 7.74<br>(-6.45-11.8)  |
| Burkina Faso                | Male   | 69.4<br>(61-73.5)   | 0.288<br>(0.109-0.348)         | 0.107<br>(0.0313-0.14)         | 9.02<br>(0.275-13)           | 9.31<br>(0.546-13.3)  | 9.13<br>(0.381-13.1)  |
| Burkina Faso                | Female | 74.2<br>(60.7-78.8) | 0.0148<br>(0.00576-0.0189)     | 0.00249<br>(0.00025-0.00342)   | 9.09<br>(-3.82-13.4)         | 9.1<br>(-3.81-13.4)   | 9.09<br>(-3.82-13.4)  |
| Cabo Verde                  | Male   | 74.8<br>(72.4-77.2) | 0.533<br>(0.484-0.589)         | 0.214<br>(0.19-0.241)          | 5.16<br>(3.79-6.29)          | 5.7<br>(4.32-6.85)    | 5.38<br>(4.01-6.51)   |
| Cabo Verde                  | Female | 82.3<br>(80.2-84.7) | 0.0943<br>(0.0821-0.108)       | 0.0242<br>(0.0199-0.0289)      | 4.05<br>(2.75-5.09)          | 4.15<br>(2.84-5.2)    | 4.08<br>(2.77-5.12)   |
| Cameroon                    | Male   | 70.8<br>(64.9-74.9) | 0.403<br>(0.282-0.487)         | 0.164<br>(0.111-0.21)          | 7.77<br>(2.38-10.7)          | 8.17<br>(2.71-11)     | 7.93<br>(2.52-10.8)   |
| Cameroon                    | Female | 75.3<br>(70.2-79.2) | 0.0378<br>(0.03-0.0424)        | 0.0146<br>(0.0099-0.0188)      | 8.27<br>(4.57-11.1)          | 8.31<br>(4.59-11.1)   | 8.29<br>(4.58-11.1)   |
| Chad                        | Male   | 69.8<br>(64.8-74.2) | 0.433<br>(0.371-0.482)         | 0.184<br>(0.155-0.207)         | 10.7<br>(7.09-13.6)          | 11.1<br>(7.52-14)     | 10.8<br>(7.27-13.8)   |
| Chad                        | Female | 73.7<br>(68.8-77.7) | 0.0684<br>(0.059-0.0773)       | 0.0104<br>(0.00898-0.0117)     | 11.4<br>(7.38-14.5)          | 11.5<br>(7.45-14.5)   | 11.4<br>(7.39-14.5)   |
| Côte d'Ivoire               | Male   | 72.6<br>(66.8-76.8) | 0.515<br>(0.269-0.634)         | 0.203<br>(0.102-0.252)         | 9.82<br>(4.31-13)            | 10.3<br>(4.52-13.6)   | 10<br>(4.41-13.2)     |
| Côte d'Ivoire               | Female | 77.4<br>(71.1-81.2) | 0.088<br>(0.0489-0.11)         | 0.0194<br>(0.0109-0.0261)      | 9.57<br>(4-12.8)             | 9.66<br>(4.06-12.9)   | 9.59<br>(4.02-12.9)   |
| Gambia                      | Male   | 72.2<br>(68.4-75.4) | 0.591<br>(0.519-0.664)         | 0.275<br>(0.235-0.317)         | 8.49<br>(5.66-10.7)          | 8.08<br>(6.32-11.3)   | 8.76<br>(5.98-11)     |
| Gambia                      | Female | 76.3<br>(73-79.4)   | 0.036<br>(0.0302-0.0425)       | 0.0143<br>(0.0114-0.0177)      | 8.43<br>(6.15-10.5)          | 8.45<br>(6.19-10.6)   | 8.45<br>(6.17-10.5)   |
| Ghana                       | Male   | 70.1<br>(63.7-73.7) | 0.517<br>(0.388-0.575)         | 0.356<br>(0.259-0.396)         | 6.35<br>(-0.704-8.87)        | 6.35<br>(-0.243-9.37) | 6.19<br>(-0.386-9.22) |
| Ghana                       | Female | 75.8<br>(70.5-79.4) | 0.0887<br>(0.0656-0.1)         | 0.0282<br>(0.0207-0.0314)      | 6.38<br>(0.57-9.15)          | 6.47<br>(0.62-9.24)   | 6.41<br>(0.587-9.18)  |
| Guinea                      | Male   | 72.2<br>(61.9-76.3) | 0.591<br>(0.507-0.895)         | 0.275<br>(0.248-0.429)         | 8.49<br>(1.93-14.1)          | 8.08<br>(2.63-14.8)   | 8.76<br>(2.26-14.5)   |
| Guinea                      | Female | 73.7<br>(65-78.1)   | 0.0951<br>(0.0591-0.113)       | 0.0312<br>(0.0198-0.0375)      | 9.46<br>(1.15-13.6)          | 9.55<br>(1.2-13.7)    | 9.49<br>(1.16-13.6)   |
| Guinea-Bissau               | Male   | 67.5<br>(63.4-70.6) | 0.647<br>(0.574-0.717)         | 0.434<br>(0.381-0.489)         | 11.6<br>(7.01-27.7)          | 12.2<br>(7.71-28.3)   | 12<br>(7.48-28.1)     |
| Guinea-Bissau               | Female | 73<br>(69-76.1)     | 0.0791<br>(0.0679-0.0918)      | 0.0372<br>(0.031-0.0447)       | 11.4<br>(7.18-27.9)          | 11.4<br>(7.26-28)     | 11.4<br>(7.22-27.9)   |
| Liberia                     | Male   | 74<br>(64.4-77.4)   | 0.442<br>(0.285-0.516)         | 0.228<br>(0.145-0.281)         | 7.7<br>(1.11-11.7)           | 7.7<br>(1.57-12.2)    | 7.93<br>(1.37-12)     |
| Liberia                     | Female | 74<br>(66.6-78.6)   | 0.0816<br>(0.0512-0.102)       | 0.0292<br>(0.0195-0.0387)      | 7.84<br>(1.25-11.6)          | 7.92<br>(1.31-11.7)   | 7.86<br>(1.27-11.6)   |

Supplementary Results Table S3. Life expectancy at birth by location, sex, and scenario

| Location              | Sex    | 2050                |                                                   |                                                   | Change between 2022 and 2050 |                      |                       |
|-----------------------|--------|---------------------|---------------------------------------------------|---------------------------------------------------|------------------------------|----------------------|-----------------------|
|                       |        | Reference           | Difference between Elimination-2023 and Reference | Difference between Elimination-2050 and Reference | Reference                    | Elimination - 2023   | Elimination - 2050    |
| Mali                  | Male   | 72.6<br>(67.9–76.1) | 0.795<br>(0.693–0.875)                            | 0.517<br>(0.443–0.57)                             | 10.5<br>(6.53–13.6)          | 11.3<br>(7.26–14.5)  | 11<br>(7–14.2)        |
|                       | Female | 74<br>(69.4–77.8)   | 0.121<br>(0.0955–0.147)                           | 0.0564<br>(0.0434–0.0718)                         | 9.94<br>(6.18–13.1)          | 10.1<br>(6.29–13.2)  | 9.99<br>(6.23–13.1)   |
| Mauritania            | Male   | 75.8<br>(72–79.3)   | 0.424<br>(0.36–0.497)                             | 0.141<br>(0.113–0.178)                            | 6.13<br>(3.12–12.1)          | 6.55<br>(3.53–12.5)  | 6.27<br>(3.26–12.2)   |
|                       | Female | 77<br>(73.6–80.1)   | 0.0751<br>(0.0589–0.0959)                         | 0.0126<br>(0.00918–0.0174)                        | 6.35<br>(3.62–10)            | 6.42<br>(3.71–10.1)  | 6.36<br>(3.63–10)     |
| Niger                 | Male   | 70.4<br>(64.3–75.2) | 0.269<br>(0.174–0.318)                            | 0.0821<br>(0.0431–0.0982)                         | 7.58<br>(0.245–11.3)         | 7.85<br>(0.426–11.6) | 7.67<br>(0.305–11.4)  |
|                       | Female | 71.7<br>(64.1–76.3) | 0.0307<br>(0.021–0.0384)                          | 0.00613<br>(0.00397–0.00808)                      | 6.67<br>(-0.409–10.7)        | 6.7<br>(-0.384–10.7) | 6.68<br>(-0.404–10.7) |
| Nigeria               | Male   | 73.8<br>(67–78.1)   | 0.2<br>(0.126–0.238)                              | 0.0373<br>(0.0246–0.0475)                         | 9.76<br>(3.11–13.2)          | 9.96<br>(3.27–13.4)  | 9.8<br>(3.14–13.2)    |
|                       | Female | 76.7<br>(70.4–80.7) | 0.0284<br>(0.0185–0.0349)                         | 0.00883<br>(0.00651–0.0111)                       | 9.77<br>(3.75–12.8)          | 9.8<br>(3.76–12.8)   | 9.78<br>(3.75–12.8)   |
| Sao Tome and Principe | Male   | 75.3<br>(73.1–77.1) | 0.637<br>(0.569–0.733)                            | 0.349<br>(0.305–0.405)                            | 4.61<br>(2.93–6.2)           | 5.24<br>(3.54–6.85)  | 4.95<br>(3.27–6.56)   |
|                       | Female | 78<br>(75.5–80.2)   | 0.0961<br>(0.0805–0.114)                          | 0.0509<br>(0.042–0.0609)                          | 4.36<br>(2.6–6.05)           | 4.45<br>(2.7–6.14)   | 4.41<br>(2.66–6.1)    |
| Senegal               | Male   | 75.2<br>(72–78.1)   | 0.362<br>(0.315–0.407)                            | 0.121<br>(0.101–0.143)                            | 7.64<br>(5.62–9.37)          | 8<br>(6–9.73)        | 7.76<br>(5.75–9.48)   |
|                       | Female | 78.5<br>(75.3–81.3) | 0.0217<br>(0.018–0.0261)                          | 0.00179<br>(0.00144–0.00224)                      | 7.72<br>(5.71–9.41)          | 7.74<br>(5.73–9.43)  | 7.72<br>(5.71–9.41)   |
| Sierra Leone          | Male   | 72.6<br>(65.2–77.1) | 0.531<br>(0.33–0.63)                              | 0.258<br>(0.166–0.318)                            | 10.7<br>(3.92–15.1)          | 11.3<br>(4.24–15.7)  | 11<br>(4.06–15.4)     |
|                       | Female | 73.8<br>(64.2–78.5) | 0.0877<br>(0.0455–0.117)                          | 0.0169<br>(0.00935–0.0237)                        | 9.84<br>(1.37–13.8)          | 9.93<br>(1.43–13.8)  | 9.86<br>(1.38–13.8)   |
| Togo                  | Male   | 70.9<br>(64.9–75.2) | 0.601<br>(0.348–0.678)                            | 0.354<br>(0.201–0.402)                            | 8.39<br>(1.93–11.4)          | 8.99<br>(2.23–12)    | 8.74<br>(2.09–11.8)   |
|                       | Female | 76<br>(69–80.4)     | 0.123<br>(0.092–0.145)                            | 0.0659<br>(0.0486–0.0802)                         | 8.11<br>(2.25–11.1)          | 8.23<br>(2.38–11.2)  | 8.17<br>(2.32–11.1)   |

# Supplementary Results Figure S1. Years of Life Lost (YLLs) by scenario, all causes

## A. Number of YLLs, all ages

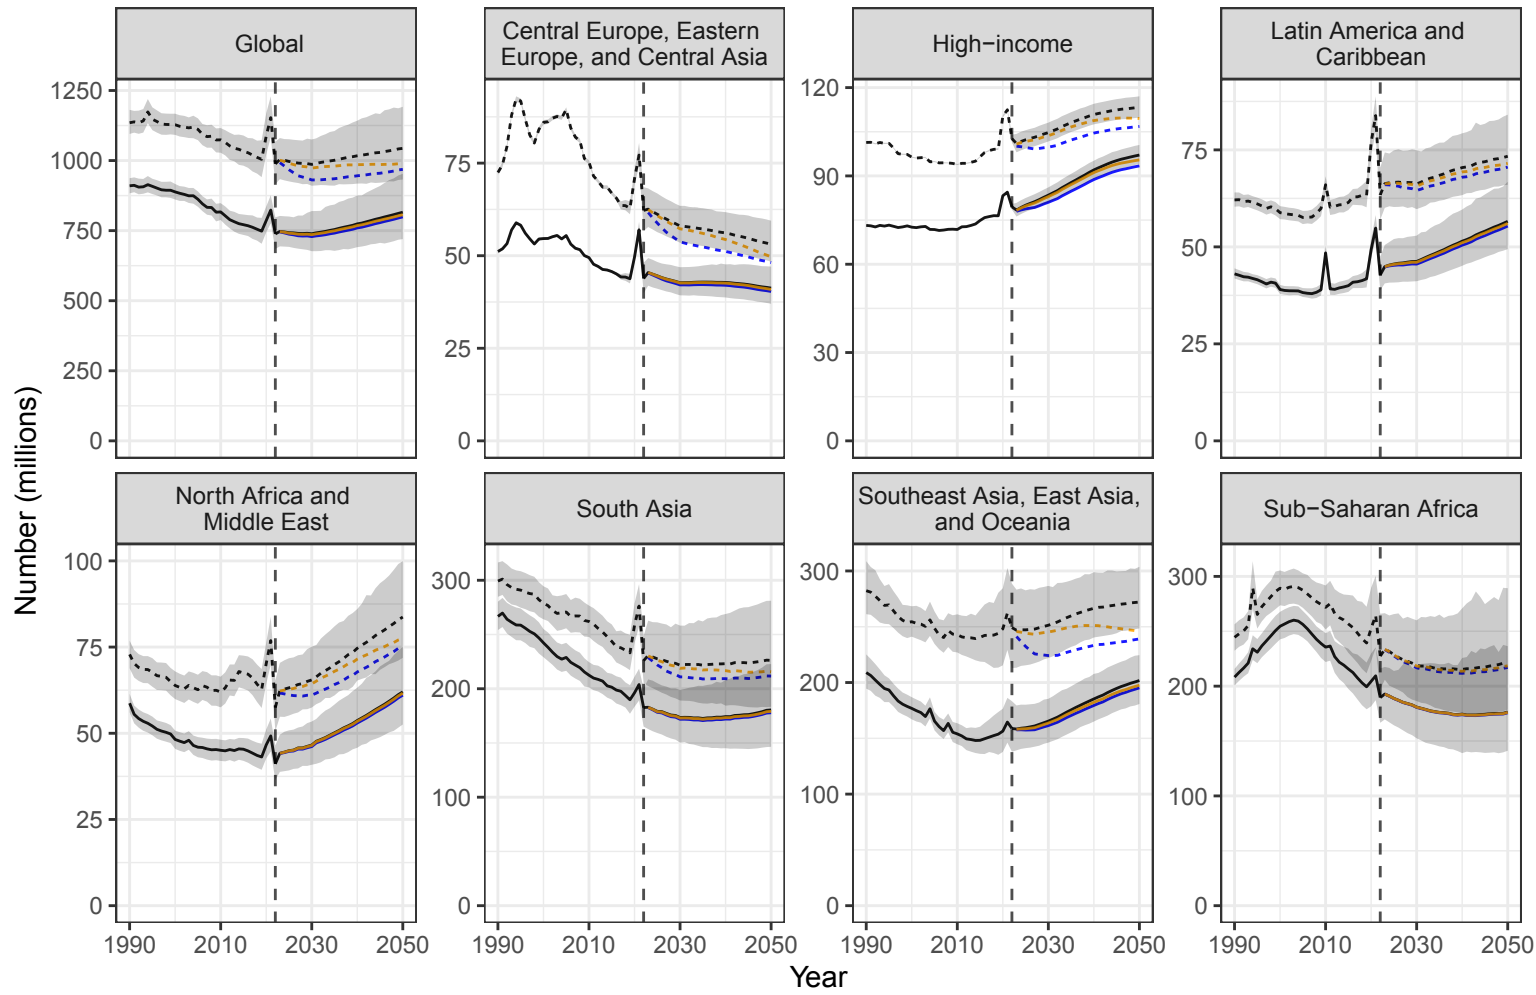

## B. Age-standardized rate of YLLs

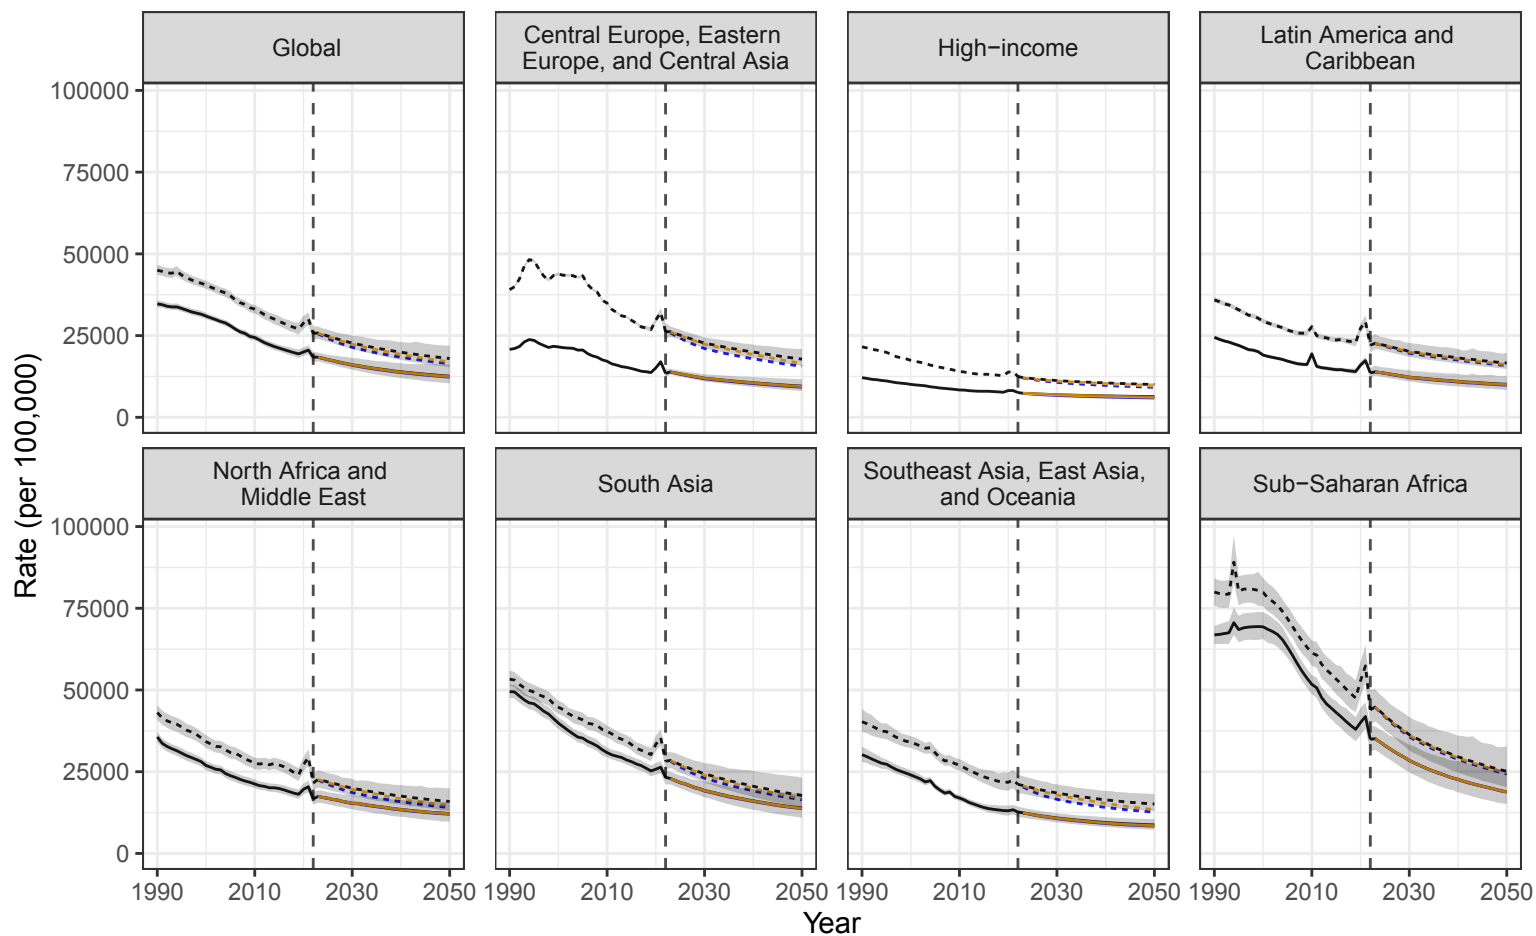

# Supplementary Results Figure S2. Years of Life Lost (YLLs) by scenario, IHD

## A. Number of YLLs, all ages

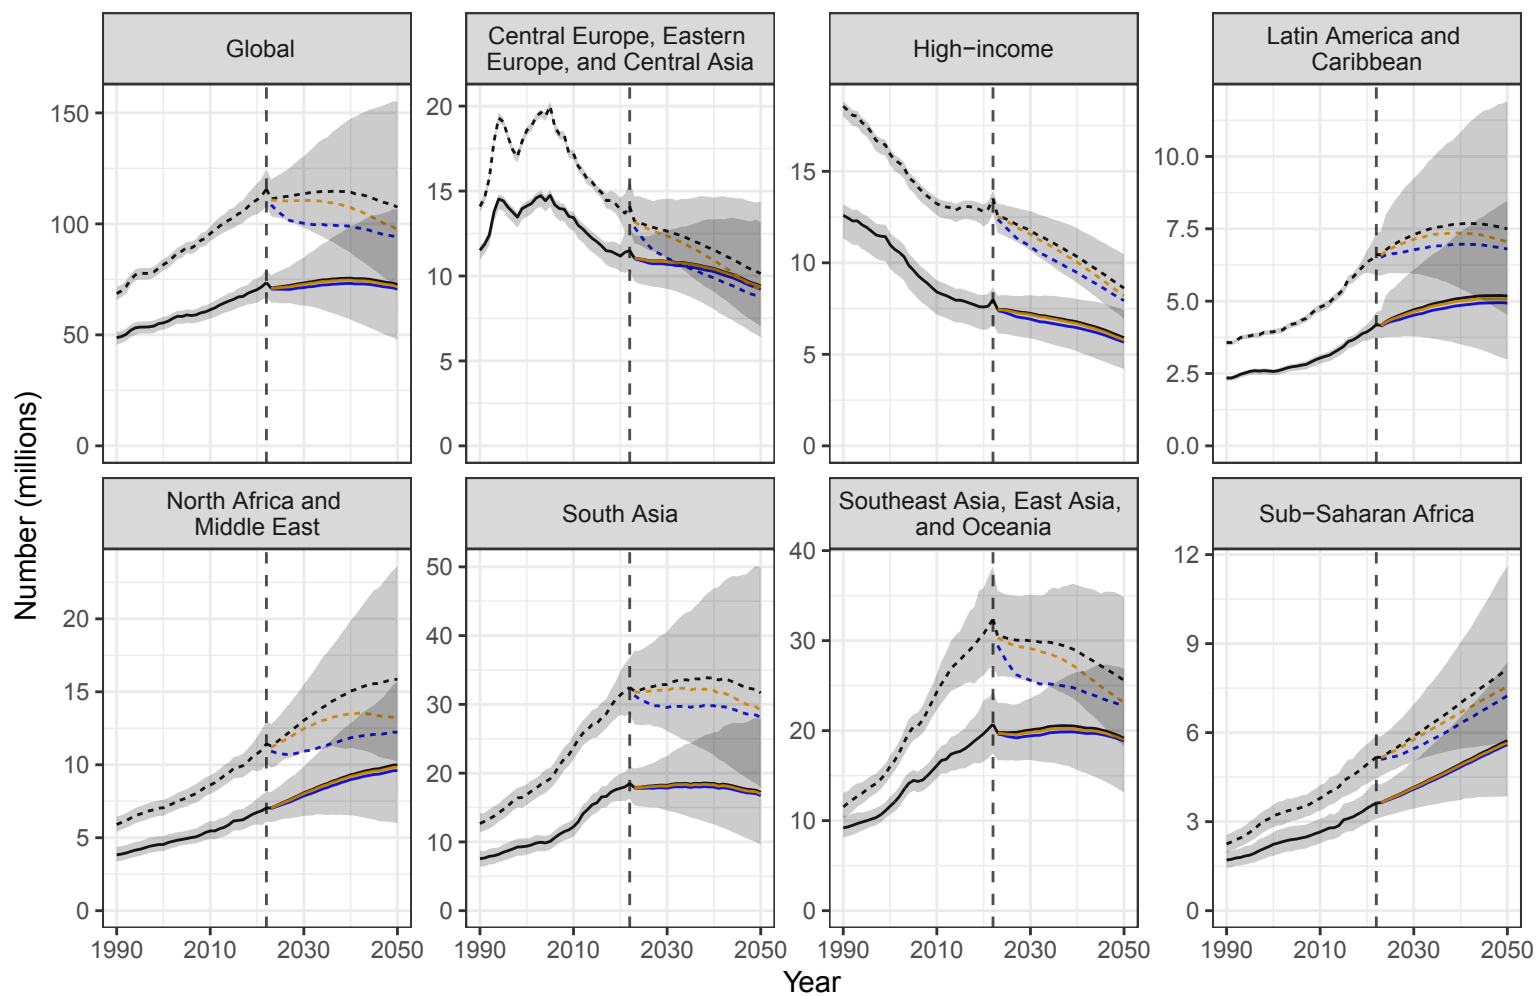

## B. Age-standardized rate of YLLs

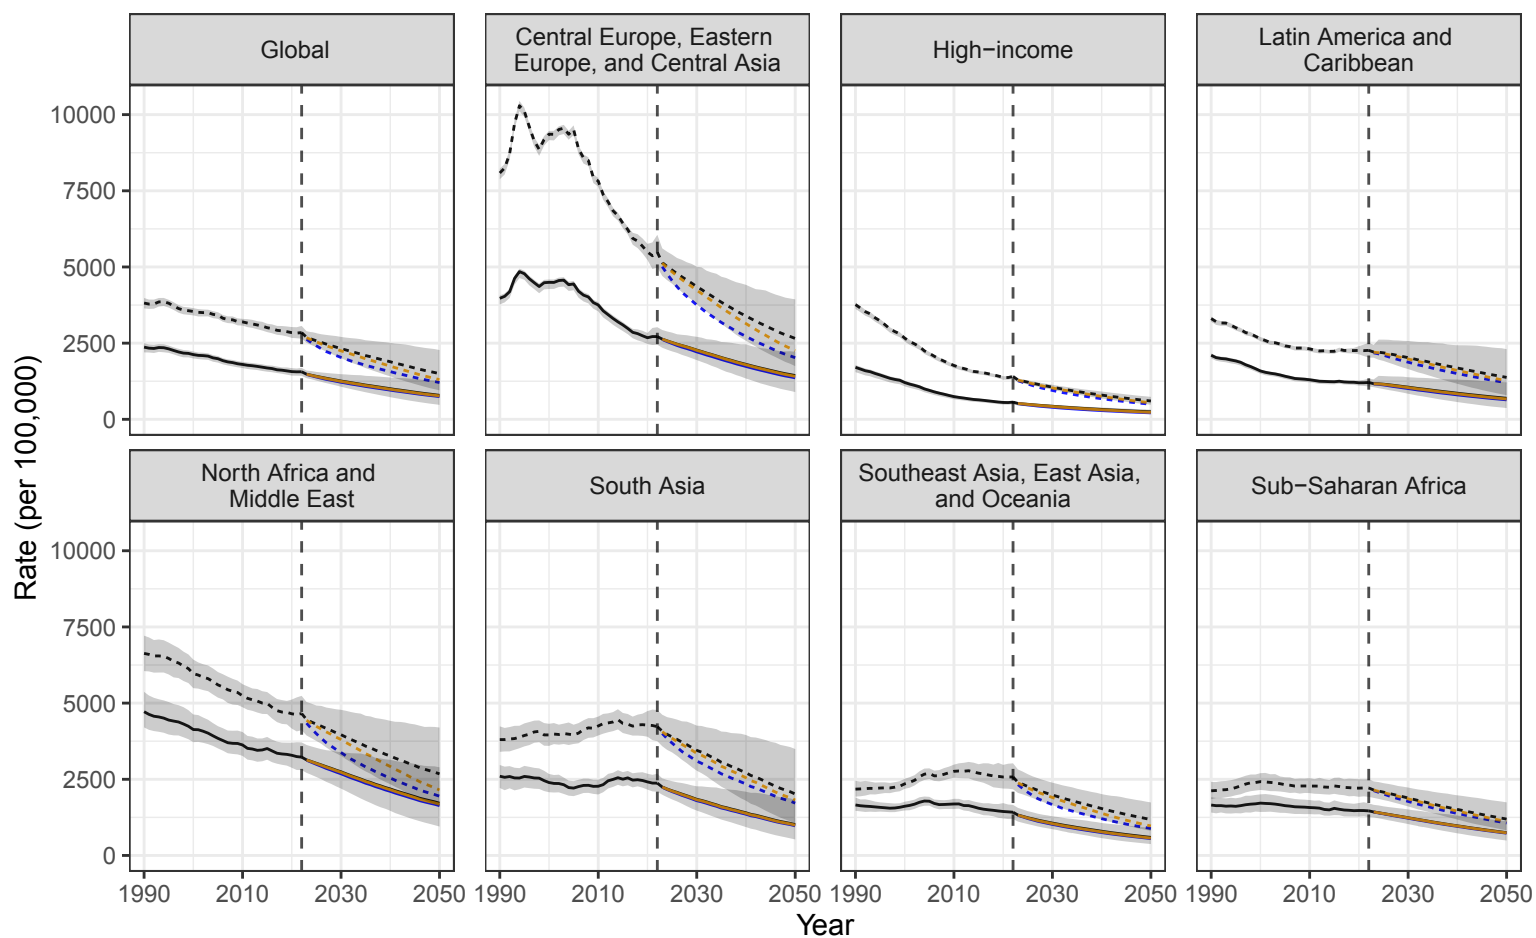

Past
  Reference
  Elimination - 2023
  Elimination - 2050
  Female
  Male

# Supplementary Results Figure S3. Years of Life Lost (YLLs) by scenario, lung cancer

## A. Number of YLLs, all ages

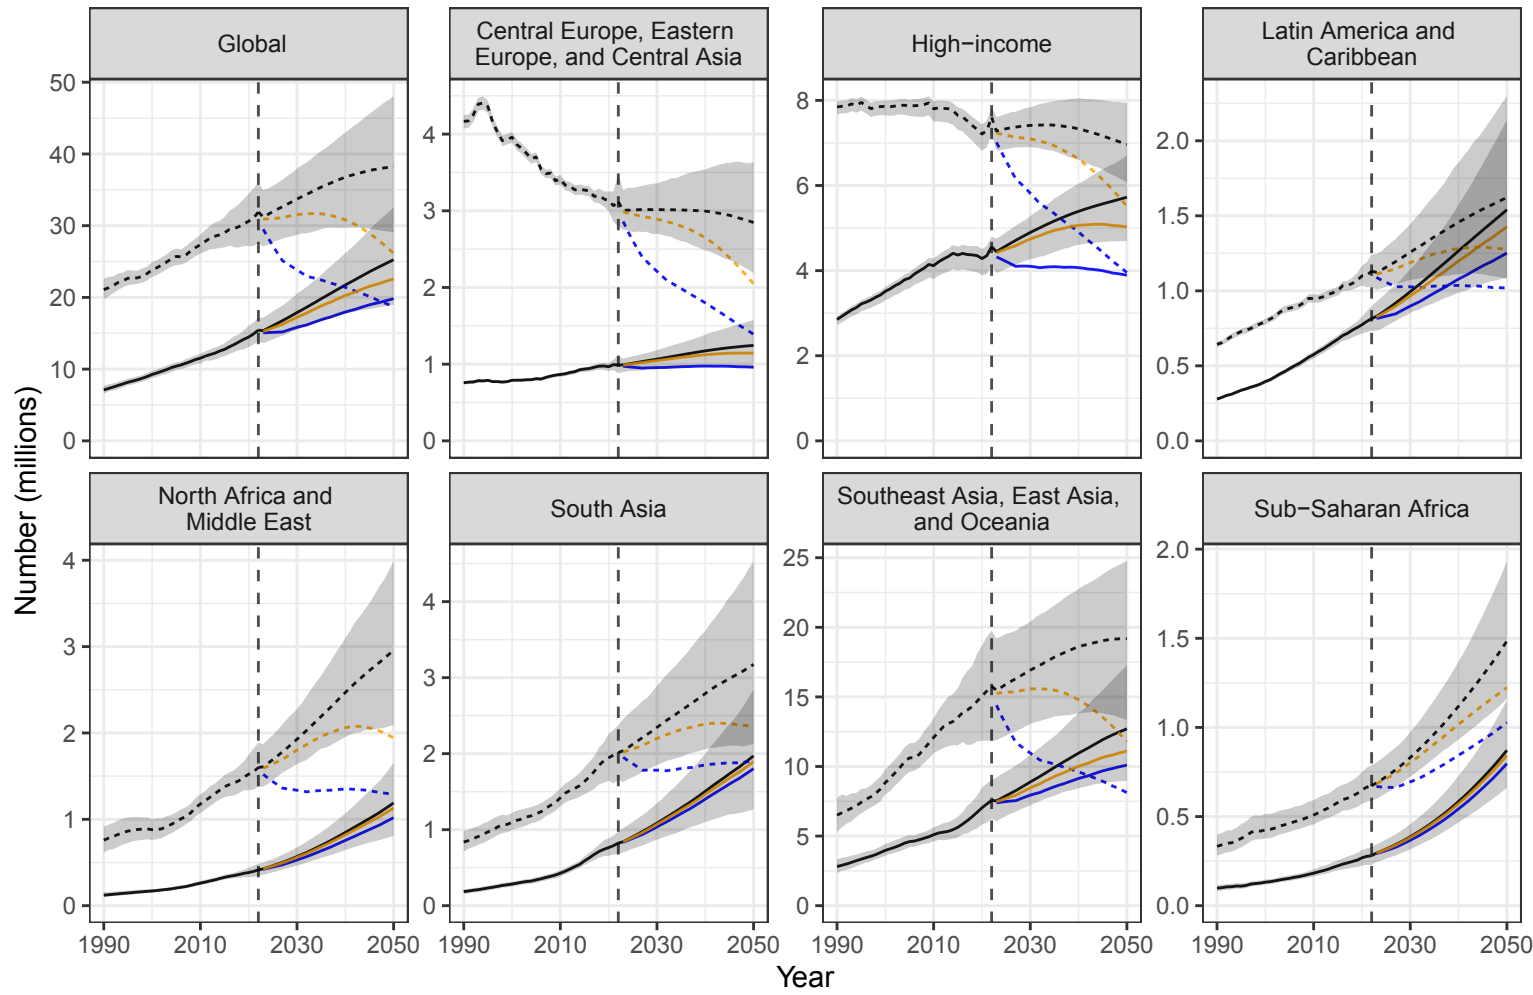

## B. Age-standardized rate of YLLs

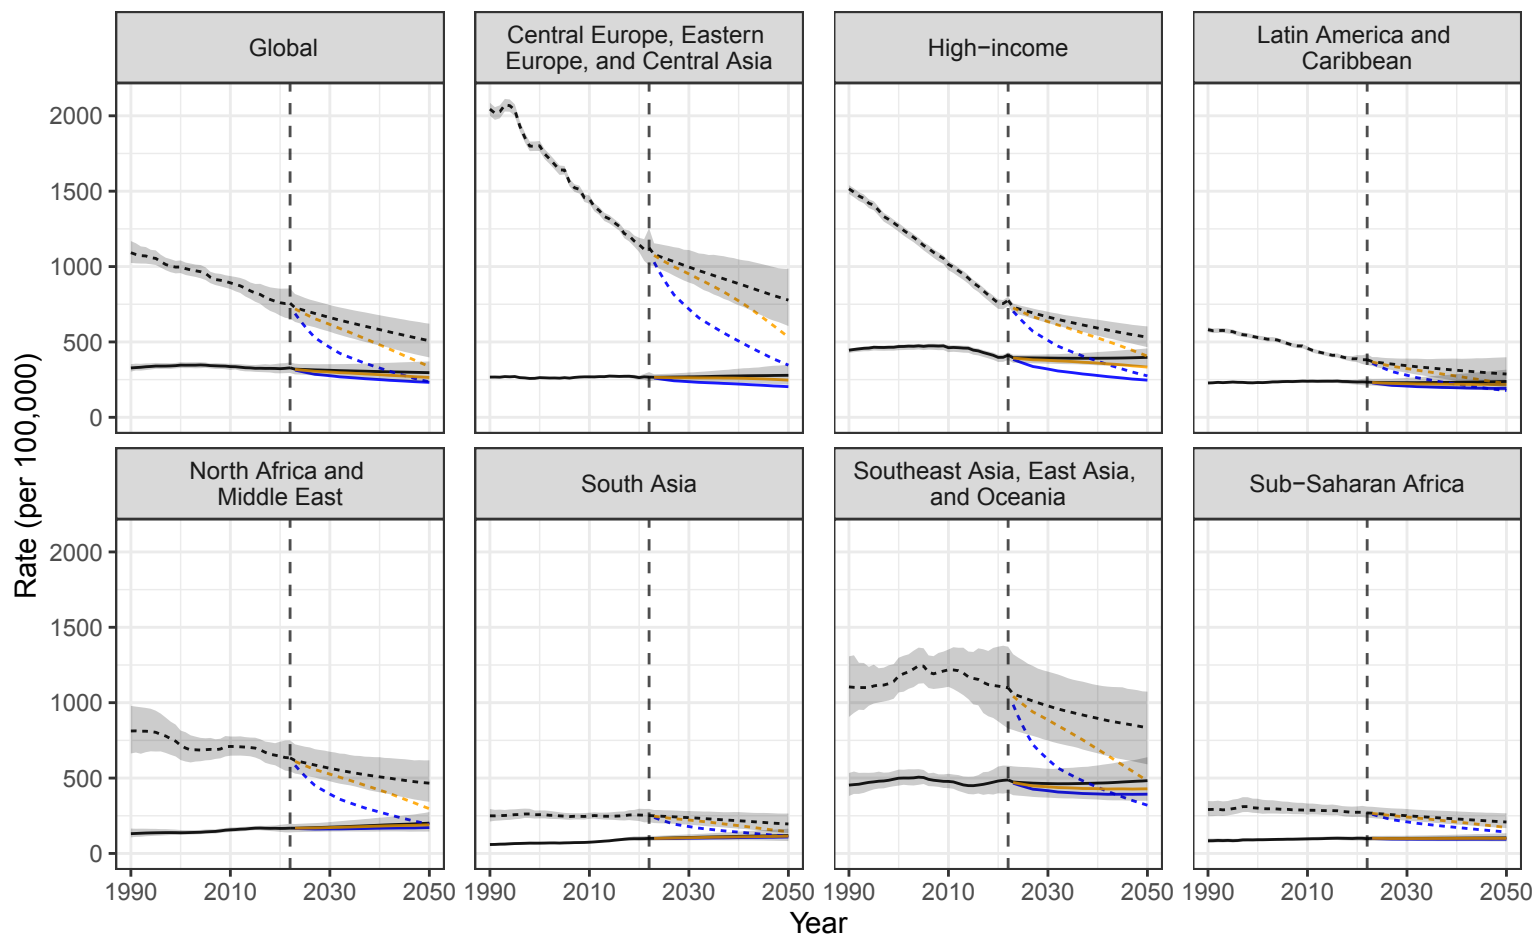

Past
  Reference
  Elimination - 2023
  Elimination - 2050
  Female
  Male

# Supplementary Results Figure S4. Years of Life Lost (YLLs) by scenario, COPD

## A. Number of YLLs, all ages

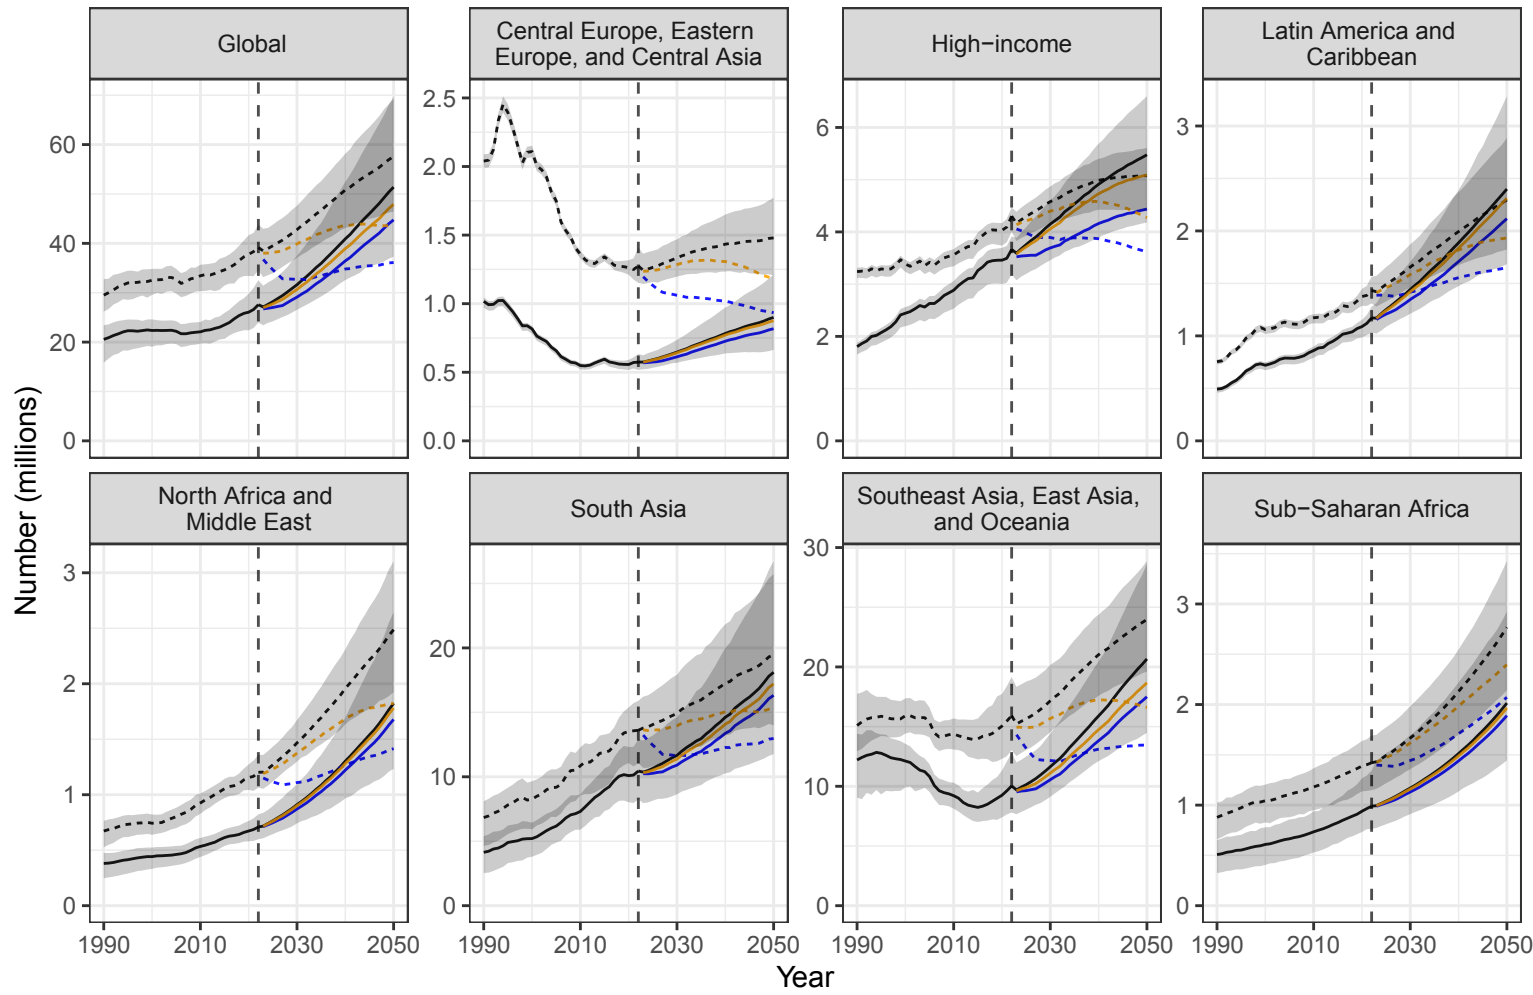

## B. Age-standardized rate of YLLs

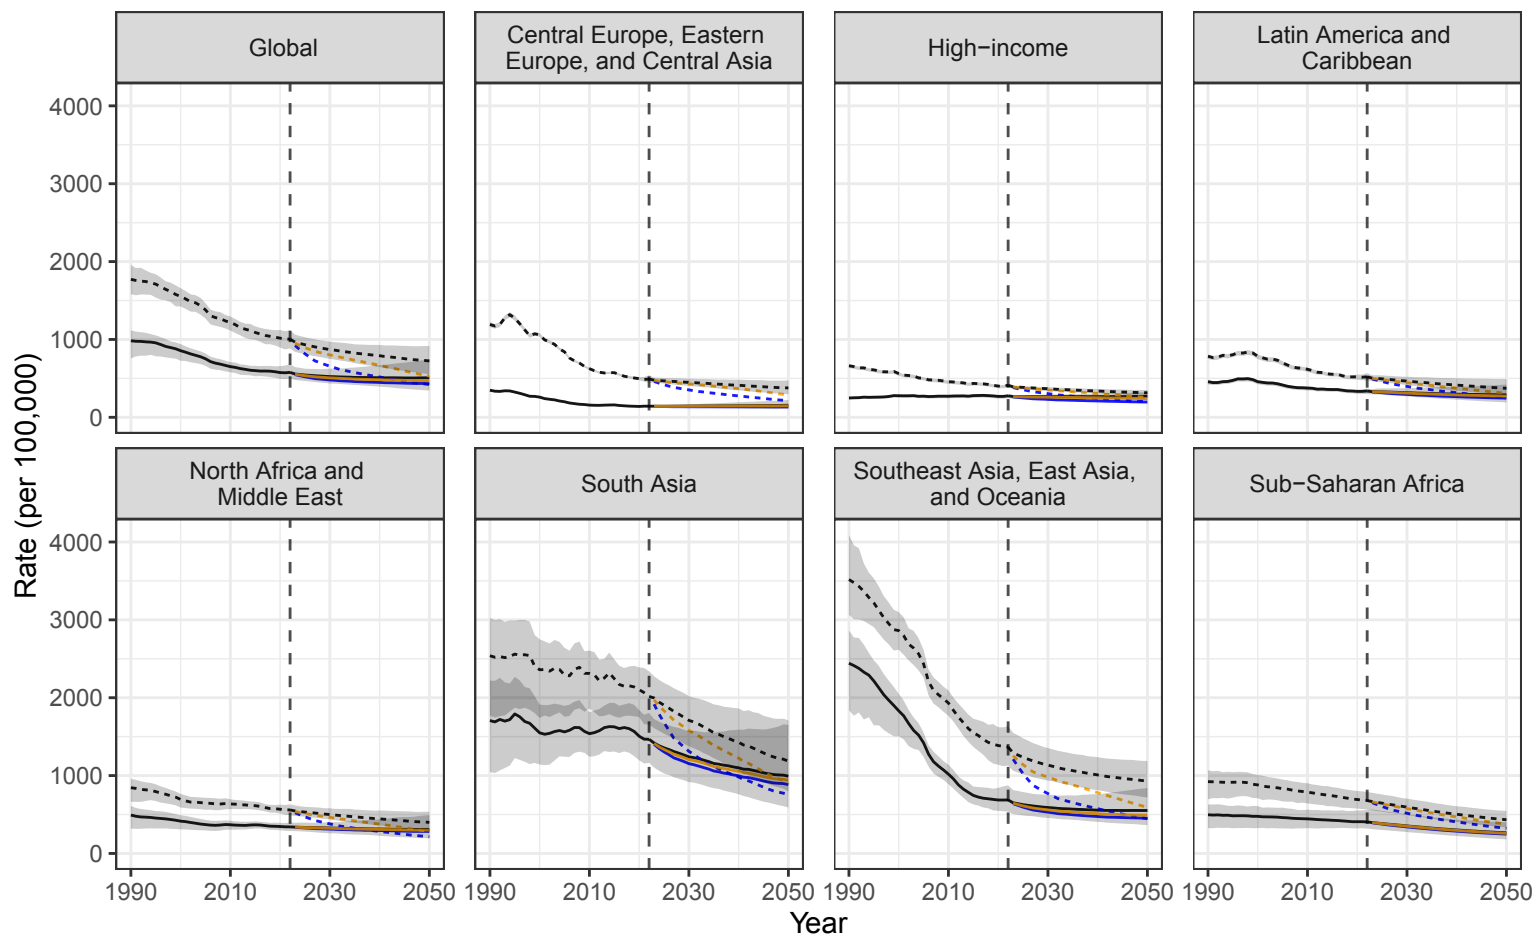

Past
  Reference
  Elimination - 2023
  Elimination - 2050
  Female
  Male

Supplementary Results Figure S5. Life expectancy at birth by super-region, sex, and scenario

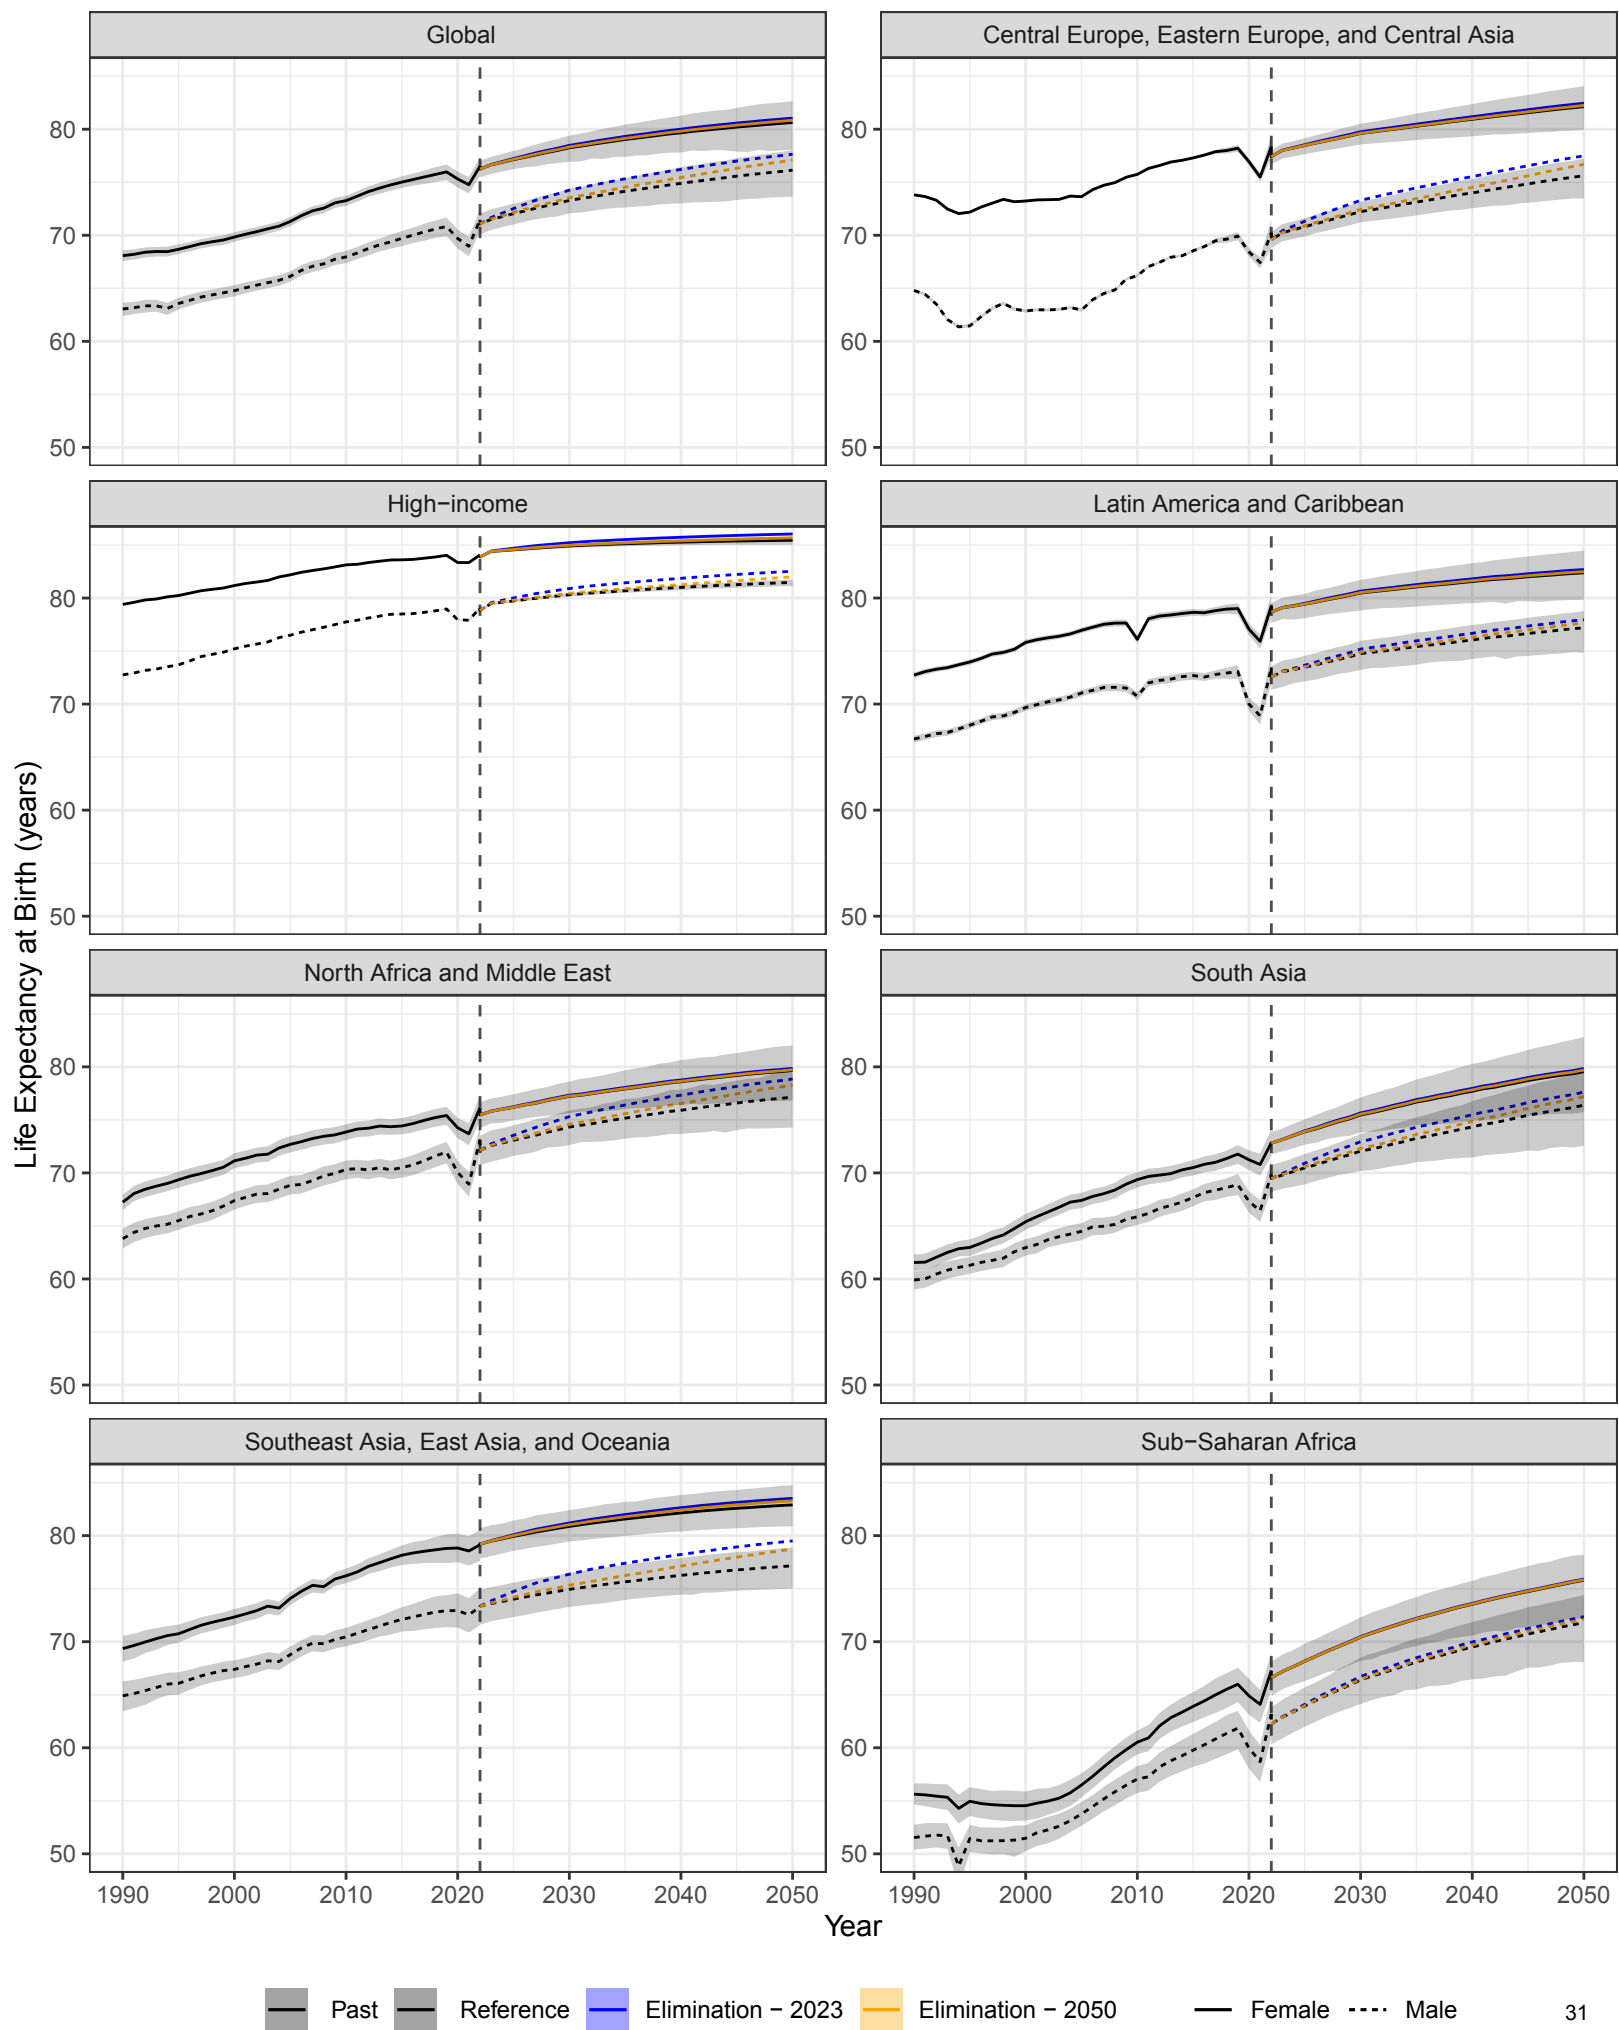



# Supplementary Results Figure S6. Global YLLs under Reference scenario

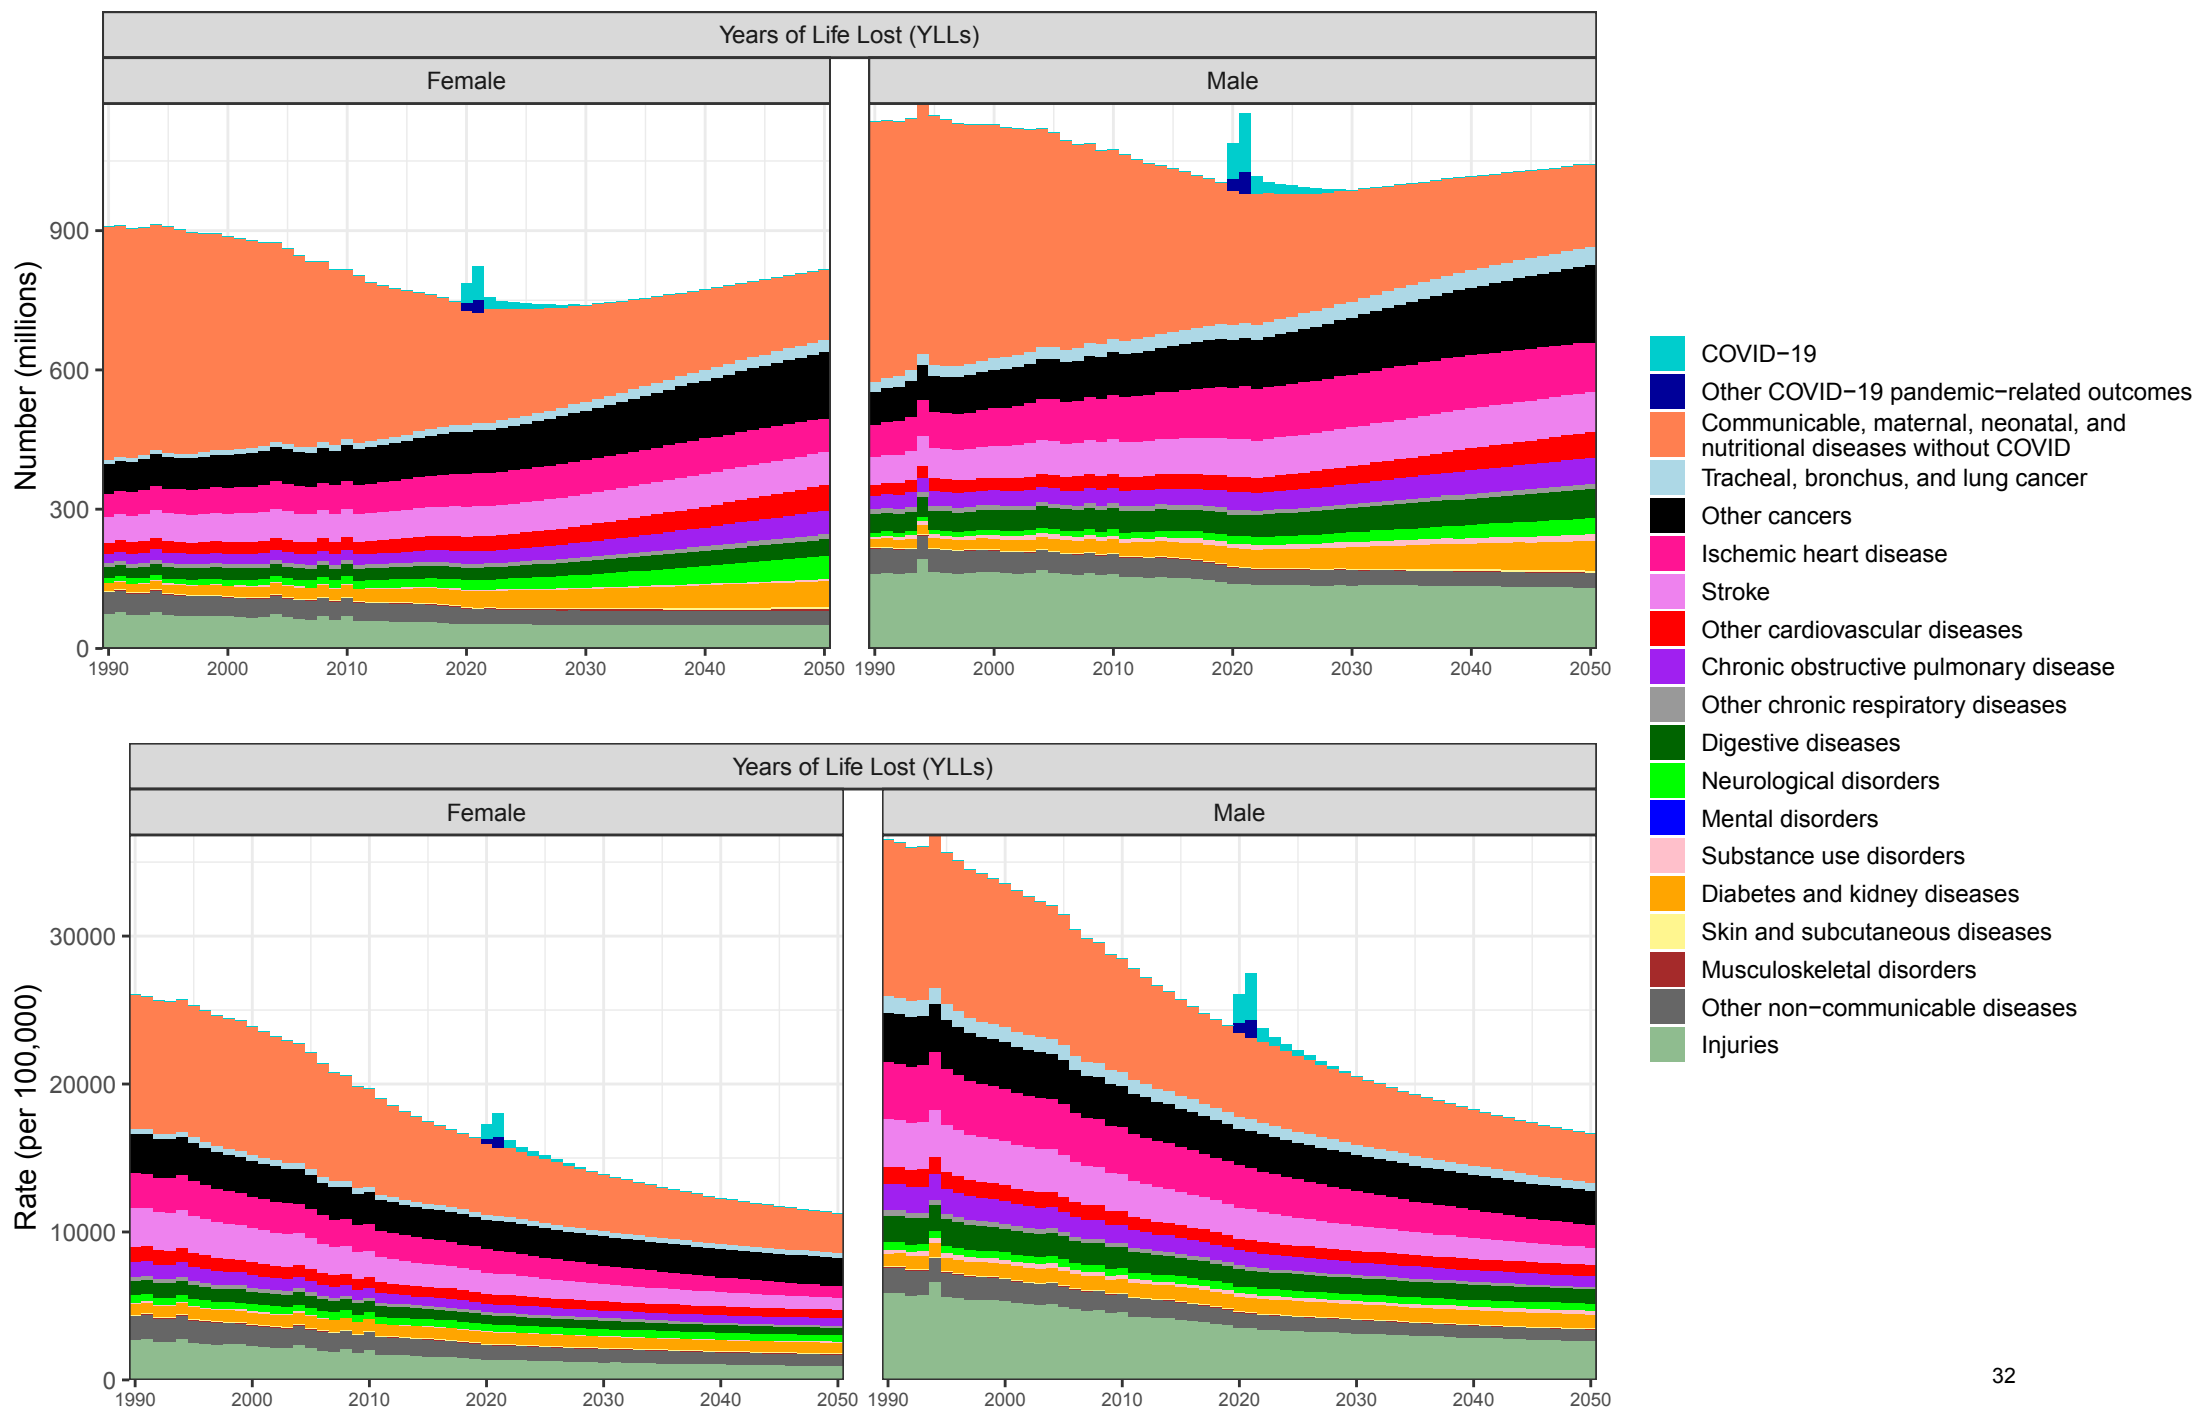

Supplementary Results Figure S7. Difference in cumulative age-standardised rate of YLLs under Elimination-2023 scenario compared to Reference scenario, 2022 to 2050 (per 100,000), Males

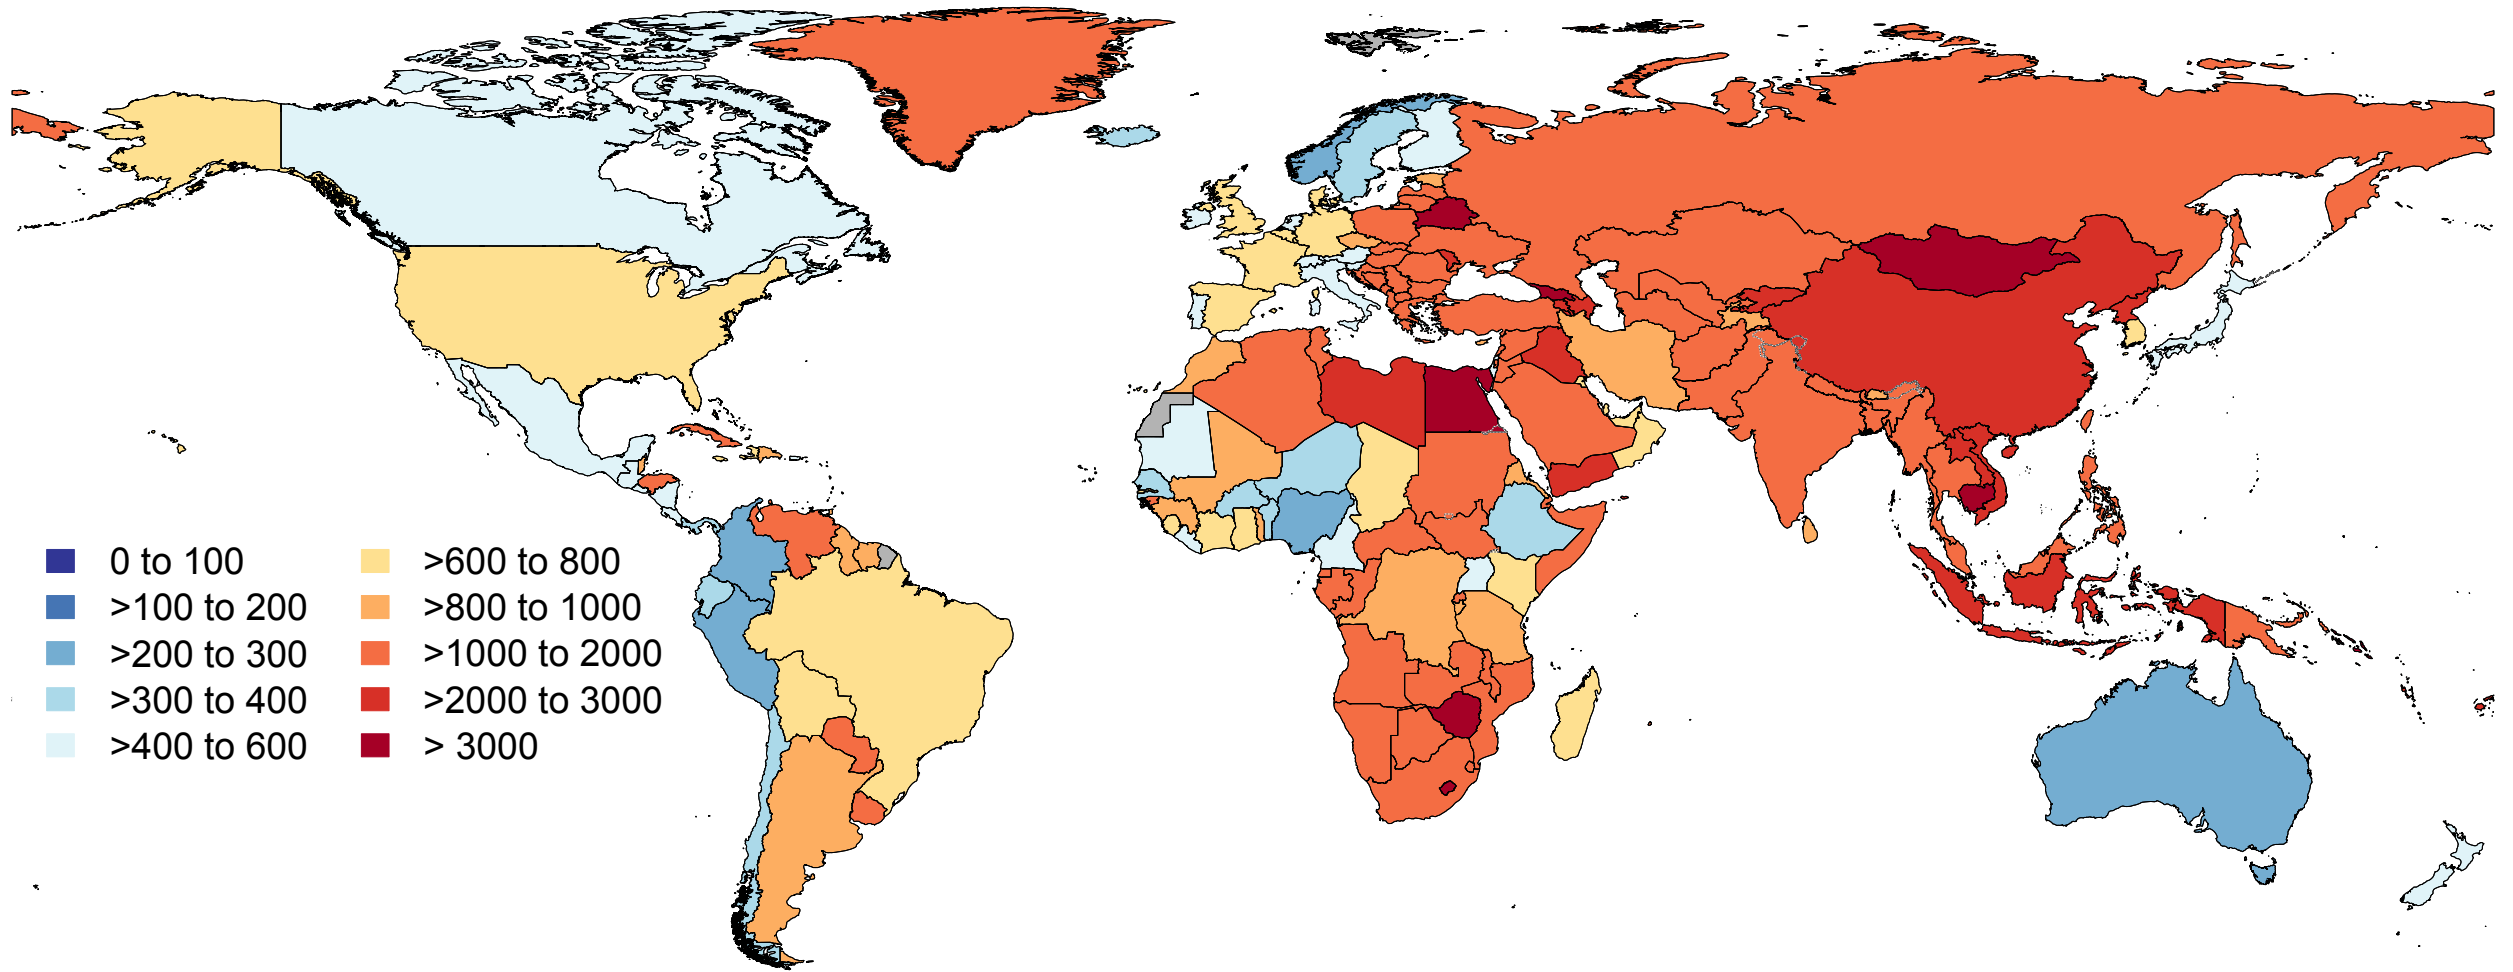

- 0 to 100
- >100 to 200
- >200 to 300
- >300 to 400
- >400 to 600
- >600 to 800
- >800 to 1000
- >1000 to 2000
- >2000 to 3000
- > 3000

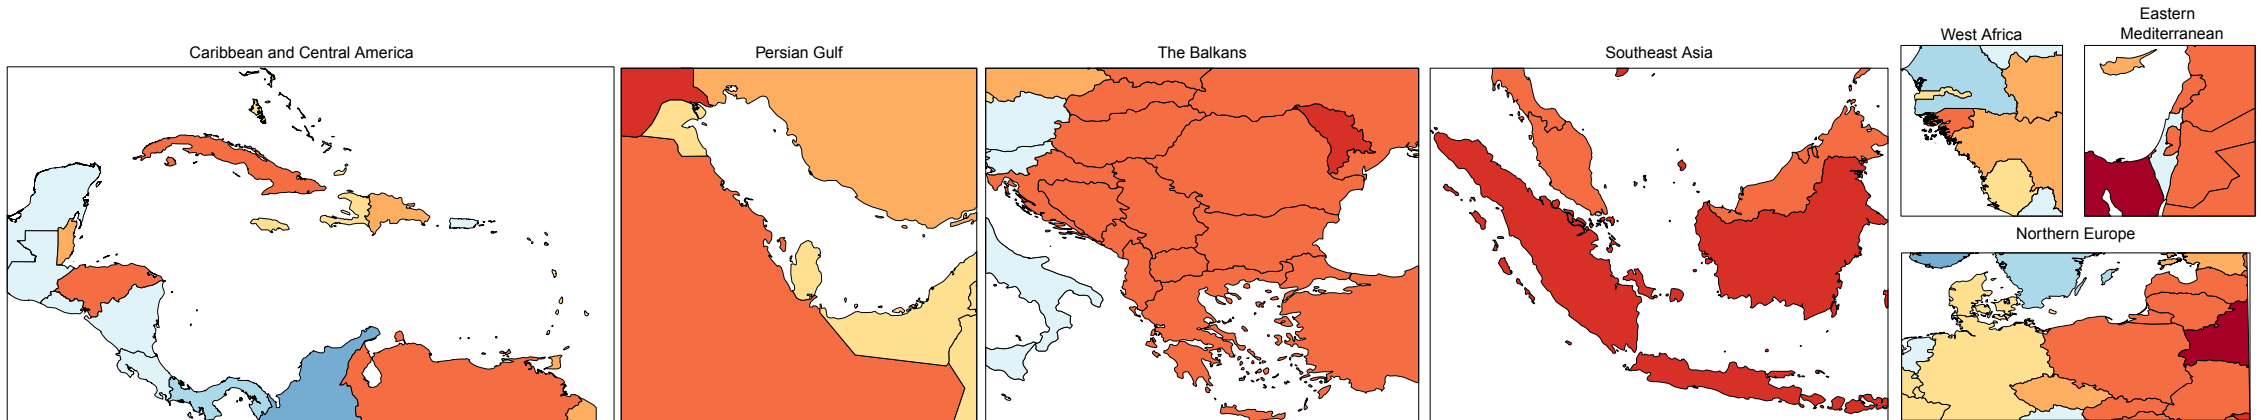

Supplementary Results Figure S8. Difference in cumulative age-standardised rate of YLLs under Elimination-2023 scenario compared to Reference scenario, 2022 to 2050 (per 100,000), Females

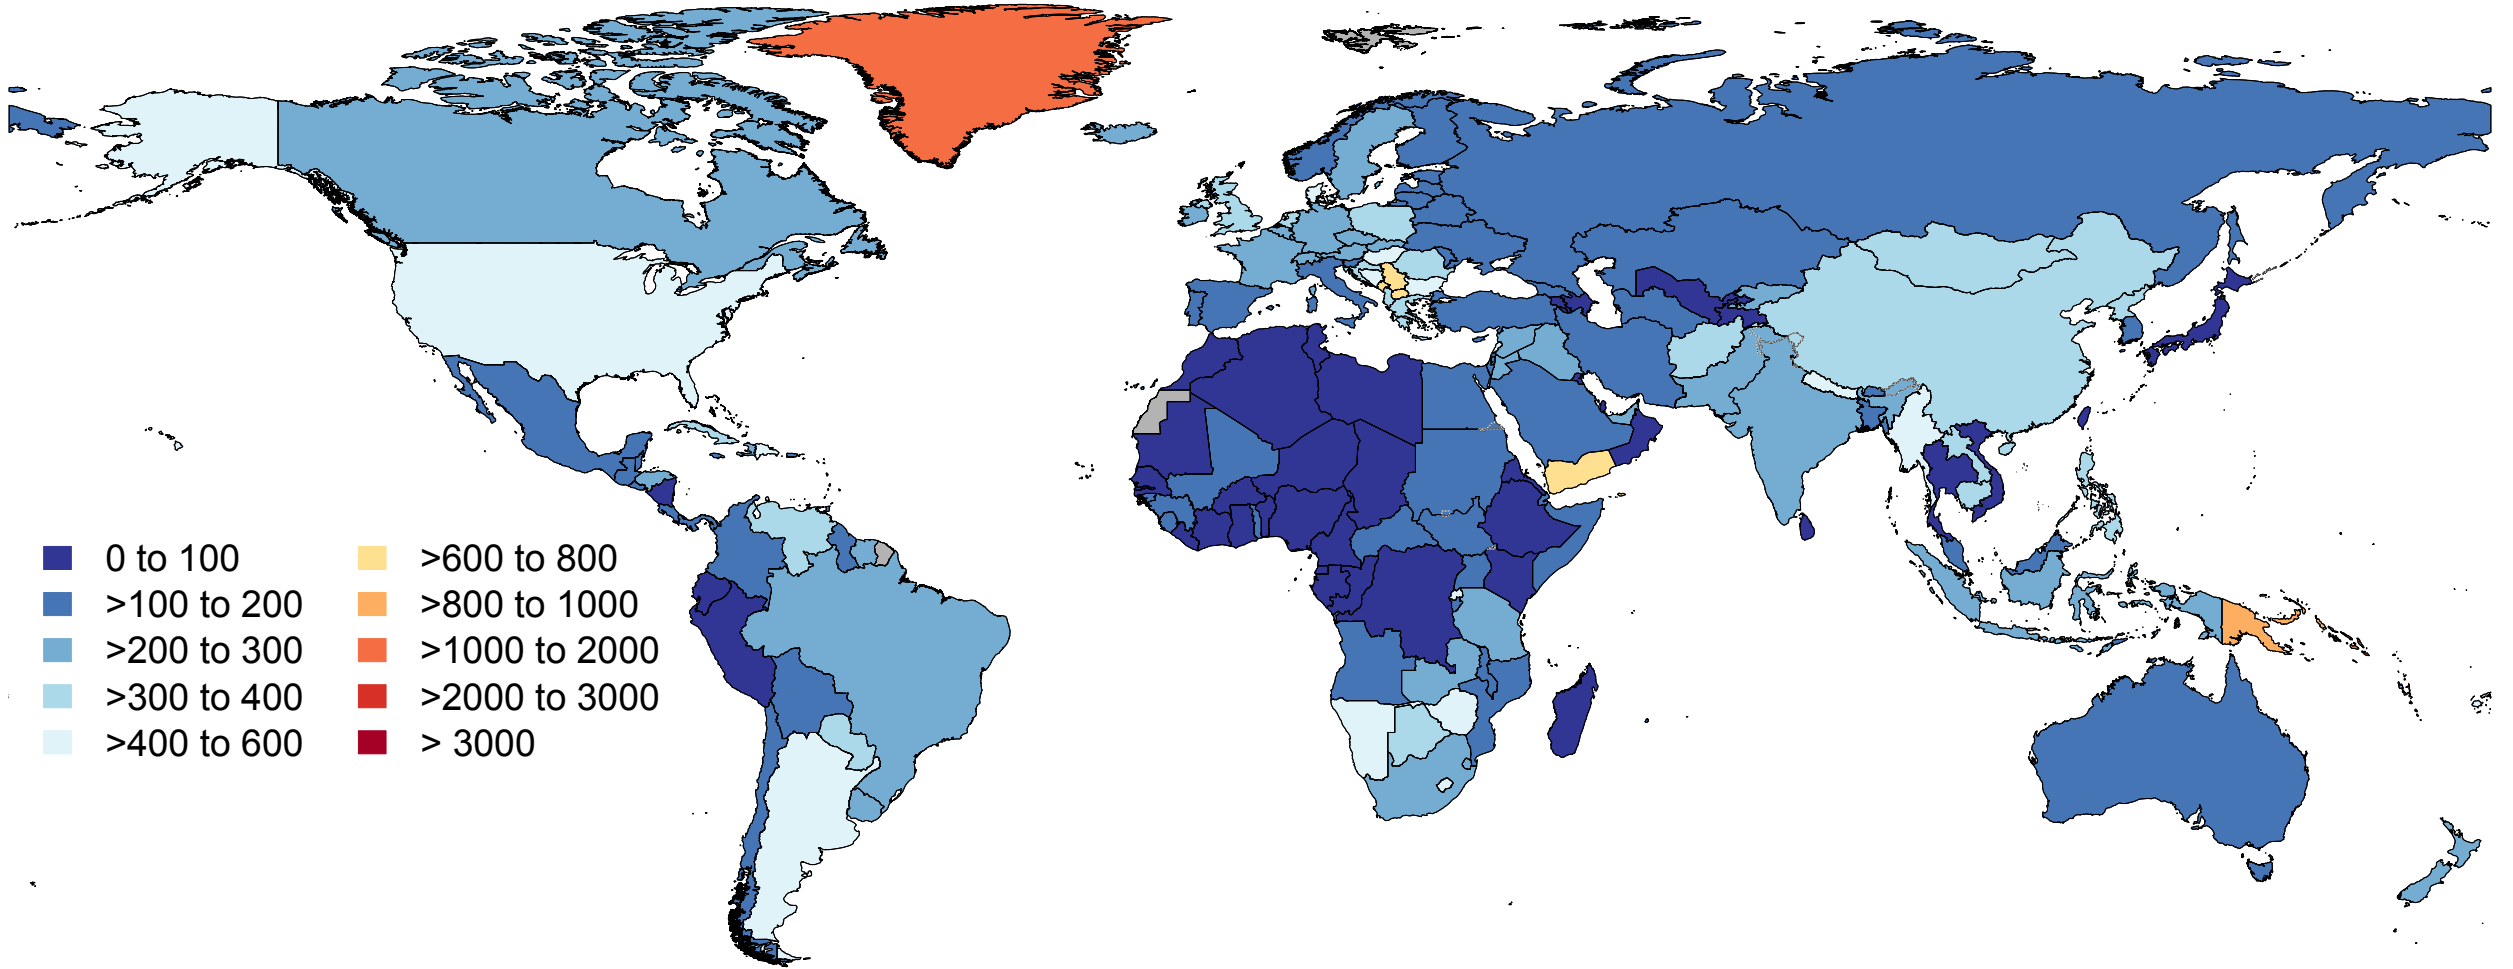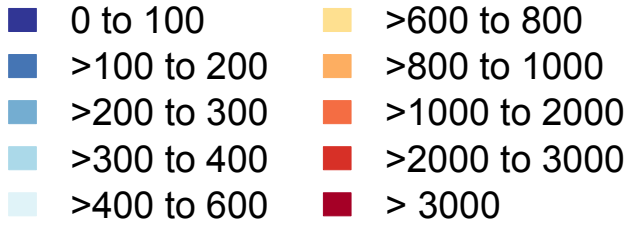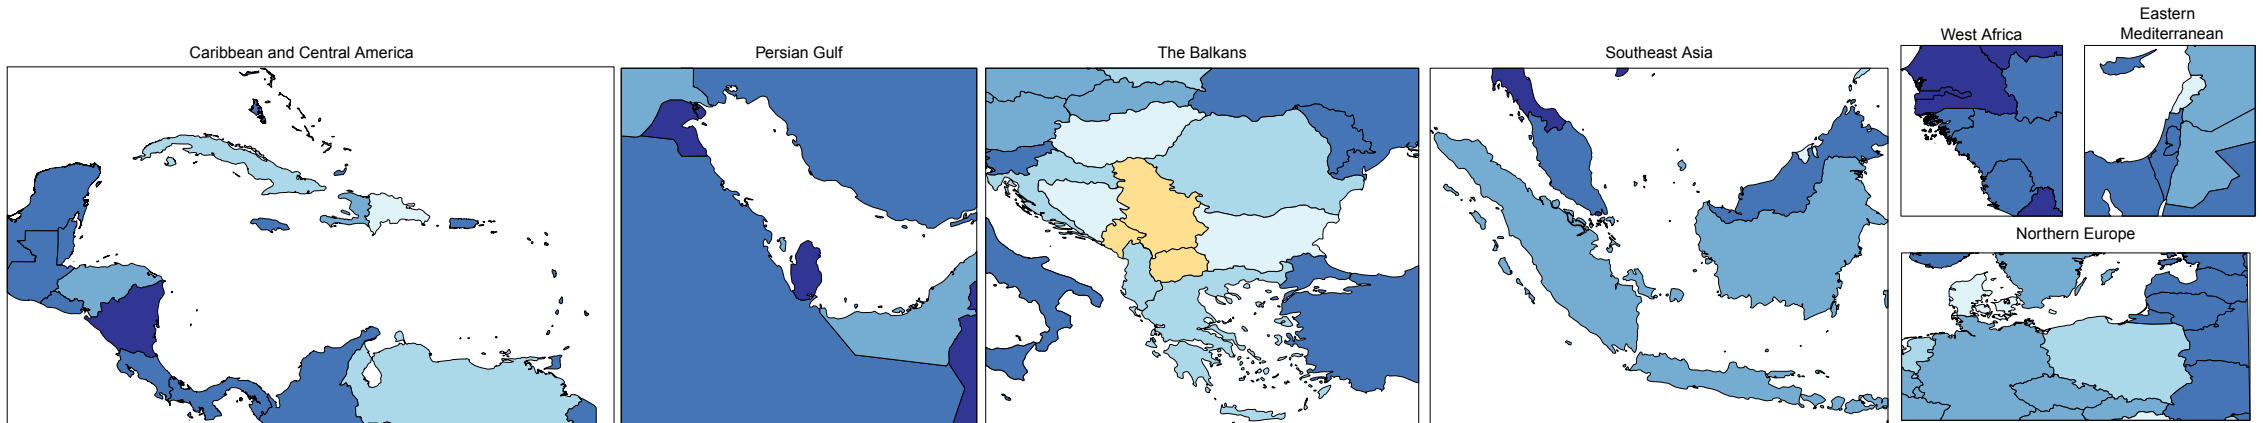

Supplement: mmc2.pdf [file mmc2.pdf]
